# Supplementary material
Source: publisher figshare collection journal article supplement (https://plos.figshare.com/articles/dataset/_/4678438)
Supplement: Supplementary file 1 [file 1]

Archive with 5 entries (5 files):
- pone.0172720.s001.pdf
- pone.0172720.s002.pdf
- pone.0172720.s003.pdf
- pone.0172720.s004.pdf
- pone.0172720.s005.xlsx
