# Supplementary material
Source: publisher figshare collection journal article supplement (https://plos.figshare.com/articles/dataset/_/4678438)
Supplement: Supplementary file 1 [file 1 › pone.0172720.s001.pdf]

**S1 Table. The list of breeds included in the study:** their sample sizes in Survey 1 (N in S1) and Survey 2 (N in S2), N of individuals in both surveys (N both Surveys), N of individuals in the merged population (S1+S2=N Total), sex ratio (ratio of males (%)), mean age (in years), and distribution according to FCI categorization (FCI group).

| <b>Breed</b>                         | <b>N in S1</b> | <b>N in S2</b> | <b>N both surveys</b> | <b>N Total</b> | <b>ratio of males (%)</b> | <b>mean age (in years)</b> | <b>FCI group</b> |
|--------------------------------------|----------------|----------------|-----------------------|----------------|---------------------------|----------------------------|------------------|
| Affenpinscher                        | 2              | 2              | 1                     | 3              | 66.7%                     | 6.0                        | 2                |
| Afghan Hound                         | 3              | 2              | 0                     | 5              | 40.0%                     | 7.8                        | 10               |
| Airedale Terrier                     | 31             | 37             | 1                     | 67             | 61.2%                     | 3.7                        | 3                |
| Akbash Dog                           | 3              | 2              | 1                     | 4              | 75.0%                     | 2.7                        | NR               |
| Akita                                | 22             | 6              | 0                     | 28             | 46.4%                     | 3.8                        | 5                |
| Alaskan Malamute                     | 11             | 8              | 1                     | 18             | 77.8%                     | 4.6                        | 5                |
| Alpine Dachsbracke                   | 4              | 1              | 0                     | 5              | 100%                      | 5.7                        | 6                |
| Altdeutscher Hütchund                | 21             | 30             | 0                     | 51             | 60.8%                     | 3.4                        | NR               |
| American Bulldog                     | 60             | 15             | 0                     | 75             | 61.3%                     | 2.1                        | NR               |
| American Cocker Spaniel              | 16             | 1              | 0                     | 17             | 64.7%                     | 5.7                        | 8                |
| American Staffordshire Terrier       | 60             | 26             | 2                     | 84             | 58.3%                     | 4.7                        | 3                |
| Andalusian Hound Maneto              | 0              | 1              | 0                     | 1              | 100%                      | 3.0                        | NR               |
| Andalusian Podenco                   | 2              | 2              | 0                     | 4              | 75.0%                     | 5.3                        | NR               |
| Appenzell Cattle Dog                 | 37             | 18             | 0                     | 55             | 63.6%                     | 2.7                        | 2                |
| Australian Cattle Dog                | 11             | 10             | 0                     | 21             | 42.9%                     | 1.9                        | 1                |
| Australian Kelpie                    | 3              | 5              | 0                     | 8              | 62.5%                     | 2.1                        | 1                |
| Australian Shepherd                  | 60             | 37             | 0                     | 97             | 64.9%                     | 2.5                        | 1                |
| Australian Silky Terrier             | 0              | 2              | 0                     | 2              | 100%                      | 2.0                        | 3                |
| Australian Terrier                   | 5              | 10             | 1                     | 14             | 42.9%                     | 3.4                        | 3                |
| Austrian Black and Tan Hound         | 2              | 1              | 0                     | 3              | 33.3%                     | 2.1                        | 6                |
| Austrian Pinscher                    | 2              | 4              | 0                     | 6              | 16.7%                     | 6.1                        | 2                |
| Azawakh                              | 0              | 2              | 0                     | 2              | 100%                      | 1.7                        | 10               |
| Bandog                               | 2              | 0              | 0                     | 2              | 50.0%                     | 10.5                       | NR               |
| Basenji                              | 4              | 3              | 0                     | 7              | 85.7%                     | 5.5                        | 5                |
| Basque Shepherd Dog                  | 1              | 2              | 1                     | 2              | 50.0%                     | 3.0                        | NR               |
| Basset Fauve de Bretagne             | 1              | 1              | 0                     | 2              | 50.0%                     | 5.0                        | 6                |
| Basset Hound                         | 8              | 5              | 0                     | 13             | 38.5%                     | 4.0                        | 6                |
| Bavarian Mountain Scent Hound        | 14             | 7              | 0                     | 21             | 71.4%                     | 3.2                        | 6                |
| Beagle                               | 60             | 37             | 0                     | 97             | 56.7%                     | 2.4                        | 6                |
| Bearded Collie                       | 58             | 33             | 1                     | 90             | 54.4%                     | 4.4                        | 1                |
| Bedlington Terrier                   | 1              | 1              | 0                     | 2              | 50.0%                     | 4.5                        | 3                |
| Belgian Shepherd Dog - Groenendael   | 9              | 9              | 1                     | 17             | 47.1%                     | 4.1                        | 1                |
| Belgian Shepherd Dog - Malinois      | 60             | 32             | 1                     | 91             | 56.0%                     | 3.1                        | 1                |
| Belgian Shepherd Dog - not specified | 24             | 15             | 0                     | 39             | 53.8%                     | 3.7                        | 1                |
| Belgian Shepherd Dog - Tervuren      | 6              | 6              | 0                     | 12             | 58.3%                     | 4.8                        | 1                |
| Berger de Beauce                     | 12             | 3              | 0                     | 15             | 73.3%                     | 2.9                        | 1                |
| Bernese Mountain Dog                 | 60             | 37             | 0                     | 97             | 56.7%                     | 3.3                        | 2                |
| Bichon Frise                         | 13             | 12             | 1                     | 24             | 58.3%                     | 3.2                        | 9                |
| Biewer Terrier                       | 9              | 6              | 0                     | 15             | 66.7%                     | 1.6                        | NR               |
| Blue Gascony Basset                  | 1              | 2              | 0                     | 3              | 100%                      | 3.4                        | 6                |
| Boerboel                             | 1              | 10             | 0                     | 11             | 54.5%                     | 2.5                        | NR               |

| <b>Breed</b>                  | <b>N in S1</b> | <b>N in S2</b> | <b>N both surveys</b> | <b>N Total</b> | <b>ratio of males (%)</b> | <b>mean age (in years)</b> | <b>FCI group</b> |
|-------------------------------|----------------|----------------|-----------------------|----------------|---------------------------|----------------------------|------------------|
| Bohemian Shepherd             | 1              | 0              | 0                     | 1              | 100%                      | 4.0                        | NR               |
| Bolognese                     | 8              | 6              | 1                     | 13             | 76.9%                     | 3.4                        | 9                |
| Bolonka Zwetna                | 40             | 16             | 0                     | 56             | 60.7%                     | 1.8                        | NR               |
| Border Collie                 | 60             | 37             | 0                     | 97             | 57.7%                     | 2.9                        | 1                |
| Border Terrier                | 14             | 21             | 2                     | 33             | 54.5%                     | 4.3                        | 3                |
| Borzoi                        | 5              | 2              | 0                     | 7              | 71.4%                     | 4.1                        | 10               |
| Boston Terrier                | 5              | 8              | 0                     | 13             | 76.9%                     | 2.2                        | 9                |
| Bouvier des Flandres          | 8              | 10             | 2                     | 16             | 56.3%                     | 4.0                        | 1                |
| Boxer                         | 60             | 37             | 0                     | 97             | 52.6%                     | 2.9                        | 2                |
| Brazilian Terrier             | 1              | 0              | 0                     | 1              | 0%                        | 2.0                        | 3                |
| Briard                        | 39             | 37             | 0                     | 76             | 60.5%                     | 3.6                        | 1                |
| Brittany Spaniel              | 11             | 22             | 0                     | 33             | 54.5%                     | 4.0                        | 7                |
| Bull Terrier                  | 20             | 15             | 0                     | 35             | 57.1%                     | 3.6                        | 3                |
| Bulldog                       | 60             | 37             | 0                     | 97             | 51.5%                     | 2.3                        | 2                |
| Bullmastiff                   | 8              | 19             | 0                     | 27             | 59.3%                     | 3.1                        | 2                |
| Cairn Terrier                 | 31             | 28             | 3                     | 56             | 48.2%                     | 5.2                        | 3                |
| Canaan Dog                    | 4              | 2              | 0                     | 6              | 66.7%                     | 2.0                        | 5                |
| Canarian Warren Hound         | 5              | 3              | 1                     | 7              | 28.6%                     | 5.2                        | 5                |
| Castro Laboreiro Dog          | 0              | 3              | 0                     | 3              | 66.7%                     | 2.6                        | 2                |
| Catahoula Cur                 | 0              | 1              | 0                     | 1              | 0%                        | 0.8                        | NR               |
| Catalan Sheepdog              | 8              | 1              | 0                     | 9              | 33.3%                     | 2.9                        | 1                |
| Caucasian Shepherd Dog        | 9              | 3              | 0                     | 12             | 83.3%                     | 2.1                        | 2                |
| Cavalier King Charles Spaniel | 25             | 36             | 1                     | 60             | 61.7%                     | 2.5                        | 9                |
| Central Asian Shepherd Dog    | 2              | 1              | 0                     | 3              | 33.3%                     | 3.0                        | 2                |
| Cesky Terrier                 | 0              | 2              | 0                     | 2              | 50.0%                     | 3.0                        | 3                |
| Chesapeake Bay Retriever      | 4              | 1              | 0                     | 5              | 80.0%                     | 4.4                        | 8                |
| Chihuahua                     | 60             | 37             | 0                     | 97             | 57.7%                     | 2.5                        | 9                |
| Chinese Crested Dog           | 8              | 4              | 1                     | 11             | 90.9%                     | 3.6                        | 9                |
| Chow Chow                     | 6              | 3              | 0                     | 9              | 66.7%                     | 6.0                        | 5                |
| Coarse-haired Styrian Hound   | 1              | 0              | 0                     | 1              | 0%                        | 4.0                        | 6                |
| Collie Rough                  | 60             | 37             | 0                     | 97             | 55.7%                     | 4.2                        | 1                |
| Collie Smooth                 | 3              | 10             | 0                     | 13             | 61.5%                     | 1.8                        | 1                |
| Continental Bulldog           | 4              | 3              | 1                     | 6              | 83.3%                     | 2.2                        | NR               |
| Continental Toy Spaniel       | 7              | 11             | 0                     | 18             | 44.4%                     | 2.9                        | 9                |
| Coton de Tulear               | 23             | 16             | 1                     | 38             | 55.3%                     | 2.9                        | 9                |
| Cretan Hound                  | 1              | 2              | 0                     | 3              | 0%                        | 2.7                        | NR               |
| Croatian Shepherd Dog         | 2              | 2              | 0                     | 4              | 75.0%                     | 1.7                        | 2                |
| Czechoslovakian Wolfdog       | 3              | 6              | 1                     | 8              | 50.0%                     | 2.6                        | 1                |
| Dachshund - Long-haired       | 6              | 7              | 0                     | 13             | 53.8%                     | 3.1                        | 4                |
| Dachshund - Miniature         | 30             | 15             | 0                     | 45             | 48.9%                     | 2.4                        | 4                |
| Dachshund - Smooth-haired     | 60             | 37             | 0                     | 97             | 61.9%                     | 4.5                        | 4                |
| Dachshund - Wire-haired       | 60             | 37             | 0                     | 97             | 64.9%                     | 4.3                        | 4                |
| Dalmatian                     | 60             | 37             | 0                     | 97             | 61.9%                     | 4.0                        | 6                |
| Dandie Dinmont Terrier        | 1              | 0              | 0                     | 1              | 100%                      | 1.0                        | 3                |
| Danish-Swedish Farmdog        | 0              | 1              | 0                     | 1              | 100%                      | 1.0                        | 2                |

| <b>Breed</b>                        | <b>N in S1</b> | <b>N in S2</b> | <b>N both surveys</b> | <b>N Total</b> | <b>ratio of males (%)</b> | <b>mean age (in years)</b> | <b>FCI group</b> |
|-------------------------------------|----------------|----------------|-----------------------|----------------|---------------------------|----------------------------|------------------|
| Deerhound                           | 1              | 3              | 0                     | 4              | 50.0%                     | 4.7                        | 10               |
| Dobermann                           | 60             | 37             | 0                     | 97             | 64.9%                     | 3.0                        | 2                |
| Dogo Argentino                      | 10             | 9              | 0                     | 19             | 47.4%                     | 3.8                        | 2                |
| Dogo Canario                        | 14             | 18             | 3                     | 29             | 62.1%                     | 2.2                        | 2                |
| Dogue de Bordeaux                   | 24             | 12             | 0                     | 36             | 36.1%                     | 2.6                        | 2                |
| Drentsche Partridge Dog             | 0              | 1              | 0                     | 1              | 0%                        | 4.0                        | 7                |
| Dutch Schapendoes                   | 11             | 4              | 1                     | 14             | 64.3%                     | 2.6                        | 1                |
| Dutch Shepherd Dog                  | 13             | 9              | 0                     | 22             | 45.5%                     | 4.3                        | 1                |
| Elo                                 | 18             | 19             | 0                     | 37             | 51.4%                     | 2.5                        | NR               |
| English Cocker Spaniel              | 60             | 37             | 0                     | 97             | 57.7%                     | 4.0                        | 8                |
| English Foxhound                    | 0              | 1              | 0                     | 1              | 100%                      | 2.0                        | 6                |
| English Pointer                     | 11             | 12             | 1                     | 22             | 54.5%                     | 3.5                        | 7                |
| English Setter                      | 11             | 11             | 0                     | 22             | 54.5%                     | 5.1                        | 7                |
| English Springer Spaniel            | 5              | 9              | 1                     | 13             | 69.2%                     | 3.6                        | 8                |
| English Toy Terrier                 | 1              | 2              | 0                     | 3              | 33.3%                     | 4.5                        | 3                |
| Entlebuch Cattle Dog                | 21             | 20             | 1                     | 40             | 55.0%                     | 3.6                        | 2                |
| Estrela Mountain Dog                | 0              | 1              | 0                     | 1              | 0%                        | 1.7                        | 2                |
| Eurasian                            | 25             | 23             | 3                     | 45             | 66.7%                     | 4.3                        | 5                |
| Eurohound                           | 2              | 0              | 0                     | 2              | 50.0%                     | 2.7                        | NR               |
| Fila Brasileiro                     | 3              | 5              | 0                     | 8              | 62.5%                     | 2.2                        | 2                |
| Finnish lapphund                    | 1              | 0              | 0                     | 1              | 0%                        | 5.0                        | 5                |
| Flat Coated Retriever               | 21             | 37             | 1                     | 57             | 49.1%                     | 2.5                        | 8                |
| Fox Terrier - Smooth-haired         | 9              | 5              | 0                     | 14             | 71.4%                     | 4.5                        | 3                |
| Fox Terrier - Wire-haired           | 32             | 34             | 1                     | 65             | 58.5%                     | 4.3                        | 3                |
| French Bulldog                      | 60             | 37             | 0                     | 97             | 70.1%                     | 1.9                        | 9                |
| French Pointing Dog - Pyrenean type | 1              | 1              | 0                     | 2              | 50.0%                     | 4.0                        | 7                |
| Garafian Shepherd                   | 0              | 2              | 0                     | 2              | 100%                      | 2.5                        | NR               |
| German Beardog                      | 2              | 2              | 0                     | 4              | 75.0%                     | 2.2                        | NR               |
| German Hound                        | 10             | 6              | 0                     | 16             | 81.3%                     | 2.7                        | 6                |
| German Hunting Terrier              | 13             | 11             | 0                     | 24             | 66.7%                     | 3.2                        | 3                |
| German Long-haired Pointing Dog     | 7              | 2              | 0                     | 9              | 44.4%                     | 3.5                        | 7                |
| German Pinscher                     | 24             | 33             | 1                     | 56             | 64.3%                     | 3.1                        | 2                |
| German Shepherd Dog                 | 60             | 37             | 0                     | 97             | 52.6%                     | 4.0                        | 1                |
| German Short-haired Pointing Dog    | 24             | 15             | 0                     | 39             | 69.2%                     | 3.6                        | 7                |
| German Spaniel                      | 3              | 1              | 0                     | 4              | 25.0%                     | 3.0                        | 8                |
| German Spitz - Giant                | 0              | 3              | 0                     | 3              | 66.7%                     | 1.3                        | 5                |
| German Spitz - Medium               | 18             | 9              | 0                     | 27             | 40.7%                     | 4.0                        | 5                |
| German Spitz - Miniature            | 10             | 6              | 0                     | 16             | 62.5%                     | 3.1                        | 5                |
| German Spitz - Wolfspitz            | 14             | 7              | 0                     | 21             | 71.4%                     | 5.2                        | 5                |
| German Wire-haired Pointing Dog     | 26             | 14             | 0                     | 40             | 55.0%                     | 3.9                        | 7                |
| Giant Schnauzer                     | 60             | 37             | 0                     | 97             | 61.9%                     | 3.7                        | 2                |
| Golden Retriever                    | 60             | 37             | 0                     | 97             | 56.7%                     | 3.6                        | 8                |
| Gordon Setter                       | 11             | 19             | 0                     | 30             | 60.0%                     | 3.4                        | 7                |
| Grand Basset Griffon Vendeen        | 1              | 5              | 0                     | 6              | 50.0%                     | 3.6                        | 6                |
| Great Anglo-French Tricolour Hound  | 0              | 1              | 0                     | 1              | 100%                      | 4.0                        | 6                |

| <b>Breed</b>                      | <b>N in S1</b> | <b>N in S2</b> | <b>N both surveys</b> | <b>N Total</b> | <b>ratio of males (%)</b> | <b>mean age (in years)</b> | <b>FCI group</b> |
|-----------------------------------|----------------|----------------|-----------------------|----------------|---------------------------|----------------------------|------------------|
| Great Dane                        | 60             | 37             | 0                     | 97             | 55.7%                     | 2.9                        | 2                |
| Great Swiss Mountain Dog          | 22             | 22             | 3                     | 41             | 61.0%                     | 3.8                        | 2                |
| Greyhound                         | 2              | 5              | 1                     | 6              | 33.3%                     | 5.7                        | 10               |
| Hanoverian Scenthound             | 6              | 1              | 1                     | 6              | 83.3%                     | 2.7                        | 6                |
| Harrier                           | 1              | 0              | 0                     | 1              | 100%                      | 2.0                        | 6                |
| Havanese                          | 60             | 37             | 3                     | 94             | 53.2%                     | 2.1                        | 9                |
| Heideterrier                      | 1              | 0              | 0                     | 1              | 0%                        | 2.0                        | NR               |
| Hellenic Hound                    | 2              | 5              | 0                     | 7              | 42.9%                     | 2.6                        | 6                |
| Hovawart                          | 60             | 37             | 0                     | 97             | 60.8%                     | 3.6                        | 2                |
| Hungarian Greyhound               | 3              | 2              | 1                     | 4              | 75.0%                     | 2.1                        | 10               |
| Transylvanian Scent Hound         | 0              | 1              | 0                     | 1              | 100%                      | 5.0                        | 6                |
| Hungarian Short-haired Pointer    | 60             | 37             | 0                     | 97             | 54.6%                     | 2.4                        | 7                |
| Hungarian Wire-haired Pointer     | 2              | 1              | 1                     | 2              | 50.0%                     | 5.5                        | 7                |
| Ibizan Podenco                    | 6              | 5              | 0                     | 11             | 63.6%                     | 5.4                        | 5                |
| Icelandic Sheepdog                | 5              | 5              | 1                     | 9              | 55.6%                     | 5.0                        | 5                |
| Irish Red Setter                  | 39             | 28             | 1                     | 66             | 42.4%                     | 4.2                        | 7                |
| Irish Soft Coated Wheaten Terrier | 19             | 8              | 0                     | 27             | 48.1%                     | 4.5                        | 3                |
| Irish Terrier                     | 17             | 12             | 0                     | 29             | 51.7%                     | 4.3                        | 3                |
| Irish Water Spaniel               | 1              | 0              | 0                     | 1              | 0%                        | 2.0                        | 8                |
| Irish Wolfhound                   | 19             | 14             | 0                     | 33             | 45.5%                     | 2.9                        | 10               |
| Italian Corso Dog                 | 11             | 28             | 1                     | 38             | 60.5%                     | 2.0                        | 2                |
| Italian Greyhound                 | 1              | 0              | 0                     | 1              | 100%                      | 0.8                        | 10               |
| Italian Segugio                   | 5              | 1              | 0                     | 6              | 66.7%                     | 3.8                        | 6                |
| Italian Spinone                   | 0              | 1              | 0                     | 1              | 0%                        | 1.5                        | 7                |
| Italian Volpino                   | 1              | 0              | 0                     | 1              | 100%                      | 1.0                        | 5                |
| Jack Russell Terrier              | 60             | 37             | 0                     | 97             | 59.8%                     | 2.3                        | 3                |
| Jämthund                          | 1              | 0              | 0                     | 1              | 100%                      | 8.0                        | 5                |
| Japanese Chin                     | 5              | 0              | 0                     | 5              | 40.0%                     | 4.5                        | 9                |
| Japanese Spitz                    | 0              | 1              | 0                     | 1              | 0%                        | 2.0                        | 5                |
| Japanese Terrier                  | 1              | 0              | 0                     | 1              | 100%                      | 0.3                        | 3                |
| Kangal                            | 15             | 12             | 0                     | 27             | 51.9%                     | 3.3                        | 2                |
| Karelian Bear Dog                 | 0              | 1              | 0                     | 1              | 100%                      | 4.0                        | 5                |
| Kerry Blue Terrier                | 2              | 1              | 0                     | 3              | 33.3%                     | 2.5                        | 3                |
| King Charles Spaniel              | 3              | 0              | 0                     | 3              | 100%                      | 10.0                       | 9                |
| Komondor                          | 1              | 2              | 0                     | 3              | 0%                        | 1.3                        | 1                |
| Korean Jindo Dog                  | 1              | 1              | 1                     | 1              | 0%                        | 2.0                        | 5                |
| Kromfohrländer                    | 60             | 19             | 3                     | 76             | 60.5%                     | 3.2                        | 9                |
| Kuvasz                            | 4              | 10             | 0                     | 14             | 50.0%                     | 4.2                        | 1                |
| Labrador Retriever                | 60             | 37             | 0                     | 97             | 54.6%                     | 2.5                        | 8                |
| Lakeland Terrier                  | 5              | 3              | 0                     | 8              | 25.0%                     | 3.1                        | 3                |
| Landseer                          | 16             | 14             | 1                     | 29             | 51.7%                     | 2.4                        | 2                |
| Large Münsterländer               | 7              | 5              | 0                     | 12             | 75.0%                     | 4.9                        | 7                |
| Leonberger                        | 22             | 13             | 0                     | 35             | 60.0%                     | 2.9                        | 2                |
| Lhasa Apso                        | 20             | 5              | 1                     | 24             | 58.3%                     | 5.7                        | 9                |
| Little Lion Dog                   | 2              | 5              | 0                     | 7              | 71.4%                     | 4.4                        | 9                |

| <b>Breed</b>                       | <b>N in S1</b> | <b>N in S2</b> | <b>N both surveys</b> | <b>N Total</b> | <b>ratio of males (%)</b> | <b>mean age (in years)</b> | <b>FCI group</b> |
|------------------------------------|----------------|----------------|-----------------------|----------------|---------------------------|----------------------------|------------------|
| Majorca Mastiff                    | 2              | 0              | 0                     | 2              | 50.0%                     | 4.3                        | 2                |
| Majorca Ratter                     | 0              | 2              | 0                     | 2              | 100%                      | 6.0                        | NR               |
| Majorca Shepherd Dog               | 4              | 2              | 0                     | 6              | 33.3%                     | 4.3                        | 1                |
| Maltese                            | 60             | 37             | 0                     | 97             | 55.7%                     | 3.8                        | 9                |
| Manchester Terrier                 | 10             | 4              | 2                     | 12             | 58.3%                     | 4.8                        | 3                |
| Maremma Sheepdog                   | 9              | 3              | 0                     | 12             | 50.0%                     | 3.0                        | 1                |
| Markiesje                          | 1              | 0              | 0                     | 1              | 100%                      | 1.4                        | NR               |
| Mastiff                            | 3              | 13             | 3                     | 16             | 50.0%                     | 3.5                        | 2                |
| Medium Poodle                      | 45             | 28             | 0                     | 73             | 67.1%                     | 4.9                        | 9                |
| Miniature Australian Shepherd      | 6              | 2              | 0                     | 8              | 62.5%                     | 1.5                        | 1                |
| Miniature Bull Terrier             | 11             | 20             | 2                     | 29             | 62.1%                     | 2.1                        | 3                |
| Miniature Pinscher                 | 42             | 37             | 1                     | 78             | 55.1%                     | 2.0                        | 2                |
| Miniature Poodle                   | 31             | 14             | 0                     | 45             | 55.6%                     | 4.1                        | 9                |
| Miniature Schnauzer                | 18             | 19             | 1                     | 36             | 52.8%                     | 4.3                        | 2                |
| Mudi                               | 6              | 1              | 0                     | 7              | 71.4%                     | 4.1                        | 1                |
| Neapolitan Mastiff                 | 2              | 6              | 0                     | 8              | 62.5%                     | 4.4                        | 2                |
| Nederlandse Kooikerhondje          | 9              | 8              | 0                     | 17             | 64.7%                     | 3.3                        | 8                |
| Newfoundland                       | 42             | 23             | 2                     | 63             | 54.0%                     | 3.7                        | 2                |
| Norfolk Terrier                    | 5              | 6              | 0                     | 11             | 63.6%                     | 3.8                        | 3                |
| Norwegian Buhund                   | 0              | 1              | 0                     | 1              | 0%                        | 1.5                        | 5                |
| Norwegian Lundehund                | 0              | 1              | 0                     | 1              | 0%                        | 4.0                        | 5                |
| Norwich Terrier                    | 1              | 5              | 0                     | 6              | 50.0%                     | 3.0                        | 3                |
| Nova Scotia Duck Tolling Retriever | 6              | 12             | 1                     | 17             | 70.6%                     | 4.5                        | 8                |
| Old English Sheepdog               | 12             | 17             | 2                     | 27             | 55.6%                     | 4.3                        | 1                |
| Otterhound                         | 2              | 1              | 0                     | 3              | 33.3%                     | 5.3                        | 6                |
| Parson Russell Terrier             | 60             | 37             | 0                     | 97             | 57.7%                     | 3.0                        | 3                |
| Patterdale Terrier                 | 3              | 1              | 0                     | 4              | 0%                        | 3.5                        | NR               |
| Pekingese                          | 21             | 9              | 2                     | 28             | 53.6%                     | 3.5                        | 9                |
| Perro Bardino                      | 2              | 4              | 0                     | 6              | 50.0%                     | 2.8                        | NR               |
| Petit Basset Griffon Vendeen       | 2              | 2              | 0                     | 4              | 50.0%                     | 4.6                        | 6                |
| Picardy Sheepdog                   | 4              | 6              | 1                     | 9              | 88.9%                     | 2.8                        | 1                |
| Pit Bull Terrier                   | 58             | 21             | 1                     | 78             | 59.0%                     | 4.9                        | NR               |
| Podenco - not specified            | 22             | 33             | 2                     | 53             | 50.9%                     | 3.8                        | 5                |
| Polish Greyhound                   | 1              | 1              | 0                     | 2              | 100%                      | 4.8                        | 10               |
| Polish Hound                       | 4              | 1              | 1                     | 4              | 75.0%                     | 1.2                        | 6                |
| Polish Lowland Sheepdog            | 23             | 16             | 0                     | 39             | 51.3%                     | 3.9                        | 1                |
| Portuguese Pointing Dog            | 3              | 1              | 0                     | 4              | 50.0%                     | 2.9                        | 7                |
| Portuguese Warren Hound            | 4              | 3              | 0                     | 7              | 28.6%                     | 2.4                        | 5                |
| Portuguese Water Dog               | 2              | 3              | 0                     | 5              | 40.0%                     | 1.6                        | 8                |
| Prague Ratter                      | 8              | 12             | 0                     | 20             | 40.0%                     | 1.3                        | NR               |
| Pudelpointer                       | 2              | 1              | 0                     | 3              | 66.7%                     | 4.0                        | 7                |
| Pug                                | 60             | 37             | 0                     | 97             | 59.8%                     | 2.2                        | 9                |
| Puli                               | 2              | 4              | 0                     | 6              | 33.3%                     | 1.6                        | 1                |
| Pumi                               | 1              | 1              | 0                     | 2              | 100%                      | 5.3                        | 1                |
| Pyrenean Mastiff                   | 3              | 0              | 0                     | 3              | 100%                      | 3.1                        | 2                |

| <b>Breed</b>                          | <b>N in S1</b> | <b>N in S2</b> | <b>N both surveys</b> | <b>N Total</b> | <b>ratio of males (%)</b> | <b>mean age (in years)</b> | <b>FCI group</b> |
|---------------------------------------|----------------|----------------|-----------------------|----------------|---------------------------|----------------------------|------------------|
| Pyrenean Mountain Dog                 | 5              | 3              | 1                     | 7              | 42.9%                     | 3.4                        | 2                |
| Pyrenean Sheepdog                     | 27             | 5              | 0                     | 32             | 65.6%                     | 4.3                        | 1                |
| Ratonero - not specified              | 4              | 3              | 0                     | 7              | 28.6%                     | 2.1                        | NR               |
| Ratonero Bodeguero Andaluz            | 0              | 2              | 0                     | 2              | 0%                        | 1.3                        | NR               |
| Rhodesian Ridgeback                   | 60             | 37             | 0                     | 97             | 59.8%                     | 2.2                        | 6                |
| Romagna Water Dog                     | 4              | 4              | 0                     | 8              | 50.0%                     | 1.7                        | 8                |
| Romaner Antikdogge                    | 3              | 1              | 0                     | 4              | 50.0%                     | 1.4                        | NR               |
| Romanian Shepherd Dog                 | 1              | 0              | 0                     | 1              | 0%                        | 0.3                        | 2                |
| Rottweiler                            | 60             | 37             | 0                     | 97             | 52.6%                     | 3.8                        | 2                |
| Russian Black Terrier                 | 8              | 7              | 2                     | 13             | 61.5%                     | 4.3                        | 2                |
| Russian Spaniel                       | 1              | 0              | 0                     | 1              | 0%                        | 7.0                        | NR               |
| Saarloos Wolfhond                     | 4              | 1              | 0                     | 5              | 80.0%                     | 3.9                        | 1                |
| Saint-Usuge Spaniel                   | 2              | 1              | 1                     | 2              | 0%                        | 4.3                        | NR               |
| Saluki                                | 4              | 6              | 0                     | 10             | 60.0%                     | 3.4                        | 10               |
| Samoyed                               | 4              | 5              | 0                     | 9              | 33.3%                     | 4.2                        | 5                |
| Schipperke                            | 1              | 1              | 0                     | 2              | 50.0%                     | 4.4                        | 1                |
| Schnauzer                             | 18             | 14             | 1                     | 31             | 61.3%                     | 3.7                        | 2                |
| Scottish Terrier                      | 10             | 6              | 1                     | 15             | 33.3%                     | 4.3                        | 3                |
| Sealyham Terrier                      | 1              | 0              | 0                     | 1              | 100%                      | 3.0                        | 3                |
| Serbian Hound                         | 0              | 1              | 0                     | 1              | 0%                        | 0.5                        | 6                |
| Shar Pei                              | 24             | 13             | 0                     | 37             | 64.9%                     | 1.7                        | 2                |
| Shetland Sheepdog                     | 33             | 19             | 0                     | 52             | 53.8%                     | 3.1                        | 1                |
| Shiba                                 | 46             | 11             | 2                     | 55             | 41.8%                     | 2.8                        | 5                |
| Shih Tzu                              | 41             | 33             | 0                     | 74             | 64.9%                     | 3.0                        | 9                |
| Shiloh Shepherd Dog                   | 1              | 0              | 0                     | 1              | 0%                        | 2.0                        | NR               |
| Siberian Husky                        | 60             | 37             | 0                     | 97             | 53.6%                     | 4.6                        | 5                |
| Sloughi                               | 1              | 1              | 0                     | 2              | 100%                      | 2.8                        | 10               |
| Slovakian Chuvach                     | 1              | 2              | 1                     | 2              | 50.0%                     | 7.0                        | 1                |
| Slovakian Hound                       | 2              | 0              | 0                     | 2              | 100%                      | 5.8                        | 6                |
| Small Münsterländer                   | 60             | 34             | 1                     | 93             | 48.4%                     | 4.5                        | 7                |
| Spanish Alano                         | 2              | 2              | 0                     | 4              | 50.0%                     | 2.2                        | NR               |
| Spanish Greyhound                     | 30             | 26             | 1                     | 55             | 61.8%                     | 4.0                        | 10               |
| Spanish Mastiff                       | 2              | 1              | 0                     | 3              | 33.3%                     | 6.9                        | 2                |
| Spanish Water Dog                     | 6              | 9              | 0                     | 15             | 53.3%                     | 2.7                        | 8                |
| St. Bernard                           | 22             | 6              | 0                     | 28             | 71.4%                     | 3.6                        | 2                |
| Staffordshire Bull Terrier            | 16             | 4              | 0                     | 20             | 35.0%                     | 5.8                        | 3                |
| Staffordshire Terrier - not specified | 48             | 13             | 0                     | 61             | 45.9%                     | 4.5                        | 3                |
| Standard Poodle                       | 8              | 7              | 1                     | 14             | 50.0%                     | 5.5                        | 9                |
| Swiss Hound                           | 1              | 4              | 0                     | 5              | 40.0%                     | 3.8                        | 6                |
| Tatra Shepherd Dog                    | 4              | 2              | 0                     | 6              | 83.3%                     | 1.5                        | 1                |
| Terrier - not specified               | 28             | 25             | 0                     | 53             | 69.8%                     | 4.9                        | 3                |
| Thai Ridgeback Dog                    | 1              | 3              | 0                     | 4              | 75.0%                     | 2.6                        | 5                |
| Tibetan Spaniel                       | 1              | 4              | 0                     | 5              | 80.0%                     | 2.7                        | 9                |
| Tibetan Terrier                       | 58             | 37             | 0                     | 95             | 55.8%                     | 3.4                        | 9                |
| Tosa                                  | 3              | 1              | 0                     | 4              | 50.0%                     | 2.3                        | 2                |

| <b>Breed</b>                          | <b>N in S1</b> | <b>N in S2</b> | <b>N both surveys</b> | <b>N Total</b> | <b>ratio of males (%)</b> | <b>mean age (in years)</b> | <b>FCI group</b> |
|---------------------------------------|----------------|----------------|-----------------------|----------------|---------------------------|----------------------------|------------------|
| Toy Poodle                            | 2              | 4              | 0                     | 6              | 50.0%                     | 1.6                        | 9                |
| Tyrolean Hound                        | 1              | 1              | 0                     | 2              | 50.0%                     | 1.6                        | 6                |
| Wäller                                | 6              | 0              | 0                     | 6              | 33.3%                     | 7.3                        | NR               |
| Weimaraner                            | 52             | 37             | 0                     | 89             | 59.6%                     | 2.7                        | 7                |
| Welsh Corgi Cardigan                  | 3              | 0              | 0                     | 3              | 33.3%                     | 3.5                        | 1                |
| Welsh Corgi Pembroke                  | 1              | 1              | 1                     | 1              | 100%                      | 7.0                        | 1                |
| Welsh Springer Spaniel                | 2              | 1              | 0                     | 3              | 0%                        | 1.0                        | 8                |
| Welsh Terrier                         | 13             | 17             | 1                     | 29             | 69.0%                     | 2.9                        | 3                |
| West Highland White Terrier           | 60             | 37             | 0                     | 97             | 59.8%                     | 5.2                        | 3                |
| West Siberian Laika                   | 1              | 2              | 0                     | 3              | 66.7%                     | 4.5                        | 5                |
| Whippet                               | 29             | 32             | 2                     | 59             | 62.7%                     | 3.5                        | 10               |
| White Swiss Shepherd Dog              | 60             | 37             | 0                     | 97             | 46.4%                     | 2.9                        | 2                |
| Wire-haired Pointing Griffon Korthals | 5              | 3              | 0                     | 8              | 37.5%                     | 4.3                        | 7                |
| Xoloitzcuintle                        | 3              | 3              | 0                     | 6              | 33.3%                     | 1.7                        | 5                |
| Yorkshire Terrier                     | 60             | 37             | 0                     | 97             | 56.7%                     | 3.7                        | 3                |
| Yugoslavian Shepherd Dog              | 0              | 1              | 0                     | 1              | 0%                        | 5.0                        | 2                |
| <b>Purebred Total</b>                 | <b>4593</b>    | <b>3199</b>    | <b>92</b>             | <b>7700</b>    | <b>57.2%</b>              | <b>3.4</b>                 | <b>-</b>         |
| <b>Mixed-breed</b>                    | <b>4593</b>    | <b>3185</b>    | <b>87</b>             | <b>7691</b>    | <b>52.7%</b>              | <b>3.7</b>                 | <b>-</b>         |

To control for the popularity of the breeds, a maximum for the number of individuals per breed was established (N = 60 for S1, N = 37 for S2). For the final dataset, a random sample was selected from the breeds with more representatives than these cut-off points. When calculating the total number (N Total), individuals in both surveys were counted only once.

The numbers in the FCI group column represents:

1: Sheepdogs and cattle dogs (except Swiss cattle dogs); 2: Pinscher and schnauzer – molossoid, Swiss mountain and cattle dogs; 3: Terriers; 4: Dachshunds; 5: Spitz and primitive types; 6: Scent hounds and related breeds; 7: Pointing dogs; 8: Retrievers, flushing dogs, water dogs; 9: Companion and toy dogs; 10: Sighthounds; NR: not recognized by the FCI.
