# Supplementary material
Source: publisher figshare collection journal article supplement (https://plos.figshare.com/articles/dataset/_/4678438)
Supplement: Supplementary file 1 [file 1 › pone.0172720.s002.pdf]

**S2 Table. Descriptive data of the purebred group in Survey 1 (S1) and Survey 2 (S2).***Survey 1*

| Descriptive characteristics                          | N of breeds | % of breeds | N of dogs   | % of dogs |
|------------------------------------------------------|-------------|-------------|-------------|-----------|
| <b>a) N of dogs / breed</b>                          |             |             |             |           |
| N = 60 dogs (the established maximum)                | 37          | 14.6%       | 2220        | 48.3%     |
| N = 50-59 dogs                                       | 4           | 1.6%        | 226         | 4.9%      |
| N = 40-49 dogs                                       | 6           | 2.4%        | 304         | 6.6%      |
| N = 30-39 dogs                                       | 10          | 3.9%        | 333         | 7.3%      |
| N = 20-29 dogs                                       | 20          | 7.9%        | 560         | 12.2%     |
| N = 10-19 dogs                                       | 35          | 13.8%       | 471         | 10.3%     |
| N = 1-9 dogs                                         | 142         | 55.9%       | 479         | 10.4%     |
| <b>b) FCI group</b>                                  |             |             |             |           |
| Sheepdogs and cattle dogs (except Swiss cattle dogs) | 37          | 14.6%       | 654         | 14.2%     |
| Pinscher and schnauzer – molosoid.                   | 42          | 16.5%       | 979         | 21.3%     |
| Swiss mountain and cattle dogs                       |             |             |             |           |
| Terriers                                             | 30          | 11.8%       | 646         | 14.1%     |
| Dachshunds                                           | 4           | 1.6%        | 156         | 3.4%      |
| Spitz and primitive types                            | 23          | 9.1%        | 275         | 6.0%      |
| Scent hounds and related breeds                      | 22          | 8.7%        | 248         | 5.4%      |
| Pointing dogs                                        | 17          | 6.7%        | 332         | 7.2%      |
| Retrievers, flushing dogs, water dogs                | 15          | 5.9%        | 259         | 5.6%      |
| Companion and toy dogs                               | 25          | 9.8%        | 686         | 14.9%     |
| Sighthounds                                          | 12          | 4.7%        | 99          | 2.2%      |
| Breeds not recognised by the FCI                     | 27          | 10.6%       | 259         | 5.6%      |
| <b>Purebred group total</b>                          | <b>254</b>  |             | <b>4593</b> |           |

*Survey 2*

| Descriptive characteristics                                          | N of breeds | % of breeds | N of dogs   | % of dogs |
|----------------------------------------------------------------------|-------------|-------------|-------------|-----------|
| <b>a) N of dogs / breed</b>                                          |             |             |             |           |
| N = 37 dogs (the established maximum)                                | 38          | 15.1%       | 1406        | 44.0%     |
| N = 30-36 dogs                                                       | 9           | 3.6%        | 330         | 10.3%     |
| N = 20-29 dogs                                                       | 14          | 5.6%        | 361         | 11.3%     |
| N = 10-19 dogs                                                       | 42          | 16.7%       | 617         | 19.3%     |
| N = 1-9 dogs                                                         | 148         | 59.0%       | 485         | 15.2%     |
| <b>b) FCI group</b>                                                  |             |             |             |           |
| Sheepdogs and cattle dogs (except Swiss cattle dogs)                 | 36          | 14.3%       | 433         | 13.5%     |
| Pinscher and schnauzer - molosoid and Swiss mountain and cattle dogs | 43          | 17.1%       | 717         | 22.4%     |
| Terriers                                                             | 28          | 11.2%       | 466         | 14.6%     |
| Dachshunds                                                           | 4           | 1.6%        | 96          | 3.0%      |
| Spitz and primitive types                                            | 25          | 10.0%       | 185         | 5.8%      |
| Scent hounds and related breeds                                      | 23          | 9.2%        | 159         | 5.0%      |
| Pointing dogs                                                        | 19          | 7.6%        | 245         | 7.7%      |
| Retrievers, flushing dogs, water dogs                                | 14          | 5.6%        | 197         | 6.2%      |
| Companion and toy dogs                                               | 23          | 9.2%        | 443         | 13.8%     |
| Sighthounds                                                          | 12          | 4.8%        | 96          | 3.0%      |
| Breeds not recognised by the FCI                                     | 24          | 9.6%        | 162         | 5.1%      |
| <b>Purebred group total</b>                                          | <b>251</b>  |             | <b>3199</b> |           |

To control for the popularity of the breeds, a maximum for the number of individuals per breed was established (N = 60 for S1, N = 37 for S2). For the final dataset, a random sample was

selected from the breeds with more representatives than these cut-off points. The table presents two characteristics of the purebred group: a) the numbers of breeds within different frequency categories, and b) the distribution of the breeds and individuals among the FCI breed groups.
