# Supplementary material
Source: publisher figshare collection journal article supplement (https://plos.figshare.com/articles/dataset/_/4678438)
Supplement: Supplementary file 1 [file 1 › pone.0172720.s003.pdf]

**S3 Table. Questionnaire items in Survey 1 (see in Kubinyi et al., 2009).**

| <b>Calmness</b>                             | <b>Trainability</b>                                                      |
|---------------------------------------------|--------------------------------------------------------------------------|
| Is calm, even in ambiguous situations       | Is ingenious, inventive when seeks hidden food or toy                    |
| Can be stressed easily*                     | Is intelligent, learns quickly                                           |
| Is emotionally balanced, not easy to rile   | Is very easy to warm up to a new toy                                     |
| Is cool-headed even in stressful situations | Is not much interested except in eating and sleeping*                    |
| Is sometimes anxious and uncertain*         | Often does not understand what was expected from him/her during playing* |
| Cronbach's alpha: 0.849                     | Cronbach's alpha: 0.711                                                  |
| <b>Dog sociability</b>                      | <b>Boldness</b>                                                          |
| Fights with conspecifics frequently*        | Is rather cool, reserved*                                                |
| Is ready to share toys with conspecifics    | Is unassertive, aloof when unfamiliar persons enter the home*            |
| Is bullying with conspecifics*              | Is sometimes fearful, awkward*                                           |
| Gets on well with conspecifics              |                                                                          |
| Cronbach's alpha: 0.738                     | Cronbach's alpha: 0.642                                                  |

All items were scored using a 3-point scale

\* reverse coded
