# Supplementary material
Source: publisher figshare collection journal article supplement (https://plos.figshare.com/articles/dataset/_/4678438)
Supplement: Supplementary file 1 [file 1 › pone.0172720.s005.xlsx]

## Sheet: Data
Survey	ID	Date	Dog name	Breed	FCI group	Mix_purebred	Age	Sex	Neutering	Nprevious_dogs4gr	Age_acquisition	Owner_gender	Owner_age	Education	Npeople3gr	Nother_dogs3gr	Purpose_keeping3gr	Training4gr	Time_together2gr_S1	Play_week2gr_S1	Child2gr_S2	Where_keep3gr_S2	Walk3gr_S2	Play_day2gr_S2	Gift_S2	Allow_bed_S2	S1_Calmness	S1_Trainability	S1_DogSociability	S1_Boldness	S2_ProblematicBehaviour
2	90079	12.23.2008 1:44 AM	coco	Affenpinscher	2	1	10	1	0	0	3	2	2	2	1	1	2	0			0	1	2	1	1	1					0.42
3	2346	09.22.2007 2:21 PM	Lucas	Affenpinscher	2	1	6	1	0	3	2	2	1	2	3	2	2	1	2	2	1	2	2	1	1	1	1.8	1.6	2	0.67	0.75
1	2057	09.19.2007 11:41 PM	Raffaela	Affenpinscher	2	1	2	2	0	1	2	2	2	2	3	2	2	0	2	2							0.8	2	2	1.67
1	12641	12.24.2007 11:55 PM	Feghar	Afghan Hound	10	1	10	1	0	1	3	2	3	2	2	1	2	1	1	2							0.8	1.8	0.5	2
1	8451	11.18.2007 12:03 AM	Jahra	Afghan Hound	10	1	10	2	1	1	4	2	3	3	3	1	1	0	1	1							1.8	0.8	2	1.67
1	12869	12.28.2007 10:18 AM	Onurah	Afghan Hound	10	1	11	2	0	1	4	1	3	3	1	0	2	1	2	2							1.6	1	1.5	0.67
2	93255	01.10.2009 6:57 PM	Padon	Afghan Hound	10	1	4	1	0	3	2	2	2	4	3	0	2	0			0	1	2	1	1	1					0.5
2	81130	11.15.2008 12:02 PM	samira	Afghan Hound	10	1	4	2	0	0	2	1	3	2	1	2	3	0			1	1	2	1	1	1					1.5
2	83927	11.26.2008 7:35 PM	Accarazevole aus dem G?nztal	Airedale Terrier	3	1	5	1	0	1	2	2	3	2	2	0	2	3			0	2	2	1	1	0					0.33
1	11364	12.09.2007 8:49 PM	adele	Airedale Terrier	3	1	1.5	2	0	1	3	1	3	2	3	1	1	1	1	2							0.6	1	1.75	0.67
1	13366	01.02.2008 6:12 PM	Aika	Airedale Terrier	3	1	11	2	0	2	1	2	3	4	1	2	2	0	2	2							1.6	1.6	1	2
2	79383	11.08.2008 7:41 AM	Amy	Airedale Terrier	3	1	4	2	0	2	4	2	3	2	3	0	2	0			1	1	2	2	0	1					0.17
2	83156	11.23.2008 6:56 PM	Angie	Airedale Terrier	3	1	3	2	1	3	4	2	3	3	2	0	2	1			0	1	2	1	1	0					0.67
1	635	09.06.2007 4:28 PM	Annie	Airedale Terrier	3	1	3	2	1	1	2	2	3	4	3	0	1	3	2	2							2	1.8	1.75	1.67
1	512	09.04.2007 6:37 AM	Anton	Airedale Terrier	3	1	3.5	1	0	3	2	1	3	4	2	1	1	2	1	2							1.4	1.2	1.75	1.67
2	64988	09.01.2008 2:39 PM	Anton	Airedale Terrier	3	1	1	1	0	1	2	2	3	2	2	0	2	2			0	2	2	1	1	0					0.67
2	66987	09.11.2008 2:53 PM	Ares	Airedale Terrier	3	1	3	1	0	3	2	2	3	2	1	2	2	2			0	2	2	2	0	1					0.25
1	852	09.10.2007 1:43 PM	Axel	Airedale Terrier	3	1	15	1	0	0	4	2	3	4	1	0	2	0	2	2							1.4	1.8	1.75	1.33
2	63103	08.22.2008 2:30 AM	Bommelito	Airedale Terrier	3	1	1.5	1	0	0	2	1	3	2	3	0	2	3			0	1	2	1	0	0					1.08
2	54635	07.13.2008 6:47 PM	bucki	Airedale Terrier	3	1	3	1	0	0	2	2	3	4	2	0	3	1			0	3	3	1	0	0					0.33
2	53985	07.10.2008 7:22 AM	Campino	Airedale Terrier	3	1	2	1	1	0	2	2	3	2	2	0	1	3			0	1	2	2	1	0					0.67
1	12263	12.18.2007 8:17 PM	Cherry	Airedale Terrier	3	1	11	1	1	0	2	2	2	2	3	0	2	3	2	1							2	1	1.25	1.67
2	75685	10.21.2008 1:11 PM	Chico	Airedale Terrier	3	1	0.4	1	0	3	2	1	3	3	2	0	2	1			0	2	2	2	1	0					0.75
2	83167	11.23.2008 10:29 PM	Ede	Airedale Terrier	3	1	1.25	1	0	1	2	2	3	3	2	0	2	2			0	1	2	1	0	0					0.92
2	83159	11.23.2008 7:52 PM	Ehrat	Airedale Terrier	3	1	9	2	1	2	2	2	3	1	2	2	2	3			0	2	3	1	1	1					0.33
2	91107	12.29.2008 5:08 PM	Eika	Airedale Terrier	3	1	3	2	1	2	3	2	3	4	2	0	1	1			0	1	2	2	1	0					0.83
1	4726	10.16.2007 2:49 PM	Einstein	Airedale Terrier	3	1	2	1	0	0	3	2	3	3	3	0	1	2	2	2							1.6	1	2	1.67
2	59123	08.03.2008 4:16 PM	Fine	Airedale Terrier	3	1	0.7	2	0	2	2	2	3	4	2	0	2	2			0	2	2	1	0	0					0.58
2	84512	11.29.2008 1:58 PM	Grace	Airedale Terrier	3	1	1	2	1	0	2	1	3	3	2	0	2	2			0	2	2	1	0	0					0.58
1	3176	10.01.2007 5:18 PM	Guinni	Airedale Terrier	3	1	7	1	1	1	3	2	3	3	3	0	2	2	1	2							1	0.8	1.5	0.33
2	64899	08.31.2008 10:22 PM	Gustav	Airedale Terrier	3	1	7	1	1	2	3	2	3	2	3	1	2	1			1	1	2	1	0	0					0.58
1	4815	10.17.2007 10:29 AM	Hauke	Airedale Terrier	3	1	0.6	1	0	1	3	2	3	2	3	1	2	3	1	1							1.4	2	1.75	2
1	4896	10.17.2007 10:50 PM	Hero	Airedale Terrier	3	1	3	1	0	3	2	1	3	2	1	0	2	2	2	2							1.8	1.6	1.5	1.33
2	85707	12.04.2008 9:27 PM	inka	Airedale Terrier	3	1	8	2	1	1	2	2	4	1	2	1	2	3			0	1	2	1	0	0					0.33
2	73804	10.14.2008 9:17 AM	Janosch	Airedale Terrier	3	1	2	1	1	1	3	2	2	4	2	1	2	2			0	2	2	2	1	0					0.75
1	13462	01.03.2008 5:48 PM	joker	Airedale Terrier	3	1	5	1	0	1	1	1	4	2	2	0	1	3	2	2							1.6	1.6	1.75	2
1	6377	10.30.2007 3:38 AM	Jule	Airedale Terrier	3	1	3.5	2	1	0	2	2	3	2	2	0	1	3	2	2							1.6	1.6	2	1.67
1	877	09.10.2007 6:42 PM	Jule	Airedale Terrier	3	1	6	2	0	2	1	2	3	4	3	2	2	1	1	2							1.4	2	0.25	2
1	12622	12.24.2007 12:42 PM	Jule	Airedale Terrier	3	1	7	2	1	0	2	2	3	3	2	1	3	3	2	2							0	1.8	1.75	0.67
1	10564	12.03.2007 9:38 PM	Kasi	Airedale Terrier	3	1	3	1	1	2	2	1	3	2	1	0	2	3	1	2							1.8	2	1.25	2
2	59944	08.07.2008 10:39 PM	Kira	Airedale Terrier	3	1	5.5	2	1	3	2	2	3	3	3	0	2	2			0	1	2	1	0	0					1.25
2	60206	08.08.2008 11:22 PM	Kira	Airedale Terrier	3	1	9	2	1	1	2	2	4	2	2	0	2	3			0	1	2	1	1	1					0.42
2	61964	08.16.2008 11:09 PM	Lotte	Airedale Terrier	3	1	0.4	2	0	0	2	2	2	4	2	0	1	1			0	1	2	1	0	0					1.08
2	55010	07.15.2008 6:57 PM	Lotte	Airedale Terrier	3	1	1.5	2	1	1	2	2	3	4	2	0	1	2			0	3	2	1	1	0					0.67
3	768	09.08.2007 9:23 PM	Louis	Airedale Terrier	3	1	1.3	1	0	2	2	2	3	3	3	0	2	3	2	2	1	1	2	1	1	0	2	2	1.5	2	0.5
2	73731	10.13.2008 6:47 PM	Luis	Airedale Terrier	3	1	2	1	0	3	2	2	3	4	3	0	1	1			1	2	2	1	0	0					1.33
2	53484	07.08.2008 12:27 PM	luna	Airedale Terrier	3	1	3	2	1	1	2	2	3	2	3	1	2	0			1	1	2	1	1	0					1
2	65184	09.02.2008 6:18 PM	Maggy	Airedale Terrier	3	1	9	2	1	1	2	2	1	4	2	0	2	0			0	1	2	2	1	1					1.08
1	7508	11.08.2007 3:23 PM	Max	Airedale Terrier	3	1	5	1	0	3	3	1	3	2	2	0	2	1	2	2							1.2	1	1.5	2
1	655	09.06.2007 7:59 PM	Miro	Airedale Terrier	3	1	1.5	1	1	0	2	2	3	4	3	0	1	1	2	2							1.2	1.2	2	1.33
1	13626	01.05.2008 5:37 AM	mythos	Airedale Terrier	3	1	0.8	1	0	2	2	1	2	4	3	1	2	1	2	2							1.4	1.6	0.5	1
2	70065	09.27.2008 11:32 AM	Nanouk	Airedale Terrier	3	1	2	1	0	0	2	2	1	2	3	0	2	3			1	2	3	2	1	1					0.42
1	3691	10.06.2007 9:09 AM	Neelix	Airedale Terrier	3	1	0.4	1	0	3	2	2	3	2	3	0	1	1	2	2							1.2	2	2	2
1	1664	09.17.2007 10:51 PM	nele	Airedale Terrier	3	1	2	2	1	0	2	2	3	3	3	0	2	1	2	1							1.6	2	1.75	1.67
2	54141	07.10.2008 5:14 PM	Nelson	Airedale Terrier	3	1	3	1	0	3	2	2	3	2	2	0	2	3			0	2	2	1	1	0					0.5
2	80008	11.11.2008 7:58 PM	Olli	Airedale Terrier	3	1	2	1	0	2	3	2	3	2	3	1	2	2			0	2	2	2	1	1					0.92
1	11582	12.11.2007 3:50 PM	paloma	Airedale Terrier	3	1	4	2	0	3	2	2	3	4	2	2	2	3	2	2							1.6	2	1	1
1	10019	11.30.2007 8:36 AM	pancho	Airedale Terrier	3	1	10	1	0	3	2	2	3	1	2	0	2	3	2	2							1	2	1.25	2
2	54739	07.14.2008 12:55 PM	Patzy	Airedale Terrier	3	1	5	2	1	1	3	2	3	2	3	1	1	2			0	1	2	1	1	0					0.75
1	303	08.30.2007 10:14 PM	paul	Airedale Terrier	3	1	0.8	1	0	0	2	1	3	2	2	1	3	2	1	2							0.6	1.4	1.75	2
2	54416	07.11.2008 5:54 PM	Percy	Airedale Terrier	3	1	1.5	1	0	3	3	2	3	2	2	0	2	3			0	1	2	2	0	0					0.42
1	11406	12.10.2007 9:38 AM	Perdi	Airedale Terrier	3	1	2	2	0	1	2	1	3	1	3	0	1	0	1	1							1.2	1.8	1.5	2
1	7942	11.13.2007 8:58 AM	Pia	Airedale Terrier	3	1	2	2	1	0	2	2	3	2	3	0	2	3	1	2							0.6	1.8	1.75	2
2	75165	10.18.2008 4:40 PM	Popeye	Airedale Terrier	3	1	5	1	1	2	2	2	3	4	3	0	2	3			0	2	3	2	1	0					0.08
2	70609	09.30.2008 1:34 PM	Porthos	Airedale Terrier	3	1	1	1	0	0	2	2	2	3	2	0	2	2			0	1	2	2	1	1					0.33
1	12797	12.27.2007 1:36 PM	Roque	Airedale Terrier	3	1	3.5	1	0	0	3	1	3	2	3	0	2	2	1	1							2	1.4	1.75	2
2	53270	07.07.2008 1:18 PM	Seico	Airedale Terrier	3	1	4	1	0	1	2	2	2	3	3	2	3	3			0	2	2	1	0	1					0.5
2	71453	10.03.2008 6:49 PM	Sisko	Airedale Terrier	3	1	0.9	1	0	0	2	1	3	2	2	0	2	0			0	1	2	2	1	1					1.42
1	11729	12.12.2007 5:02 PM	sparky	Airedale Terrier	3	1	2	1	0	1	3	1	3	4	3	0	1	2	1	2							2	1.6	2	1.67
2	54002	07.10.2008 9:26 AM	Tako	Airedale Terrier	3	1	6	1	0	3	4	2	3	2	1	0	1	1			0	1	2	1	0	1					0.67
2	59105	08.03.2008 3:01 PM	tara	Airedale Terrier	3	1	10	2	0	0	2	2	3	3	3	0	2	1			0	2	3	1	1	0					0.67
1	7164	11.05.2007 12:13 PM	Toffee	Airedale Terrier	3	1	0.6	2	0	3	2	2	3	3	1	0	2	2	2	2							1.4	1.4	2	2
2	53907	07.09.2008 6:06 PM	Tom	Airedale Terrier	3	1	5	1	1	1	4	2	3	3	2	1	2	3			0	1	1	2	1	1					0.58
1	11904	12.14.2007 2:57 PM	yasko-lo	Airedale Terrier	3	1	0.8	1	0	0	2	2	4	4	2	0	2	1	2	2							1.2	1.8	2	2
1	11457	12.10.2007 2:35 PM	Yucon	Airedale Terrier	3	1	0.9	1	0	2	2	1	3	2	2	0	1	1	1	2							1	1.6	2	1.67
3	347	08.31.2007 2:05 PM	Jule	Akbash Dog	-	1	5	2	1	3	4	1	3	3	1	2	2	0	2	1	0	2	2	1	0	0	0.4	1.4	0.25	2	0.58
1	3489	10.04.2007 1:21 PM	Kiran	Akbash Dog	-	1	2	1	0	2	2	2	3	3	3	0	2	2	1	1							1.8	1.4	1.5	2
1	195	08.30.2007 9:25 AM	pala	Akbash Dog	-	1	2	1	1	1	4	2	3	3	2	1	2	2	2	2							0.8	2	2	0.67
2	60408	08.10.2008 9:12 AM	Teddy	Akbash Dog	-	1	1.7	1	0	3	3	1	3	2	3	0	2	1			0	1	3	1	1	0					1
1	9151	11.24.2007 4:08 AM	aki	Akita	5	1	3	1	0	0	2	1	3	3	3	0	1	0	1	1							1.2	2	0.25	2
2	62446	08.19.2008 7:39 PM	akita	Akita	5	1	8	2	1	1	4	1	3	3	3	0	1	0			1	2	2	1	1	0					0.75
1	9451	11.26.2007 1:40 PM	Aky	Akita	5	1	1.3	1	0	3	2	2	3	3	2	1	2	3	1	2							1.6	1.8	1	2
1	6540	10.31.2007 9:43 AM	Alewa	Akita	5	1	6	2	0	0	2	2	4	4	2	1	2	3	2	2							1.8	1.4	0.75	1.67
1	9020	11.22.2007 8:51 PM	asta	Akita	5	1	1.5	2	0	1	2	2	3	3	3	0	1	0	2	2							2	1.8	0.75	2
2	78190	11.02.2008 5:56 PM	Banira Bush Inu	Akita	5	1	9	2	0	1	2	2	3	2	3	0	1	3			1	1	2	1	1	0					0.25
1	5713	10.24.2007 7:38 PM	Ben	Akita	5	1	0.5	1	0	0	2	1	3	1	2	0	1	0	2	1							1.4	0.6	2	1.67
1	663	09.06.2007 10:08 PM	Chiyomi	Akita	5	1	3	2	0	0	3	2	2	1	2	0	2	2	2	1							0.6	1	0	1.33
1	196	08.30.2007 9:30 AM	Edda	Akita	5	1	2	2	1	1	2	2	3	3	3	0	1	2	1	2							2	2	1.25	1.67
1	13917	01.07.2008 7:58 PM	Eiwa	Akita	5	1	2	2	0	0	2	1	3	3	2	2	2	0	2	2							1.4	1.6	0.5	1.33
1	12210	12.18.2007 1:40 PM	Emmana	Akita	5	1	3	2	0	2	2	1	3	2	3	0	1	3	2	2							1.6	1.4	1.25	0.67
2	65808	09.04.2008 10:08 PM	Fuku	Akita	5	1	6	2	1	0	4	2	3	1	2	0	2	2			0	1	3	1	0	0					0.75
1	2427	09.23.2007 5:23 PM	Hertz	Akita	5	1	4.8	2	0	2	2	2	3	2	2	1	2	3	2	2							1.6	1.4	1.5	1
1	6140	10.28.2007 12:58 AM	Honshu	Akita	5	1	3	1	0	1	2	2	3	1	2	0	2	2	2	2							1.6	1.4	0.5	0.67
2	56921	07.23.2008 3:41 PM	Jinzai	Akita	5	1	1	2	0	0	2	2	3	2	3	0	2	0			0	2	2	2	1	1					0.75
1	13479	01.03.2008 7:04 PM	kimba	Akita	5	1	5	1	1	0	4	2	3	3	3	1	1	0	2	1							1.2	1.2	0.75	2
1	6542	10.31.2007 9:49 AM	Kuma	Akita	5	1	2	1	0	1	3	2	4	4	2	1	2	1	2	2							0	1.6	0.5	2
1	11461	12.10.2007 3:29 PM	Leon	Akita	5	1	2	1	0	1	2	1	3	1	3	0	2	2	1	2							0.8	2	0.5	1.67
1	13170	12.31.2007 12:37 PM	Max	Akita	5	1	8	1	0	0	2	2	3	4	3	0	3	0	2	2							1.2	0.8	0.25	0.67
1	1387	09.15.2007 12:39 PM	Nasca	Akita	5	1	4	2	0	0	2	2	2	4	2	0	2	2	2	2							1.2	2	1.25	0.67
1	3004	09.29.2007 7:41 PM	raimbow	Akita	5	1	1	1	0	0	3	1	3	3	2	0	1	0	2	2							0.2	1	1	0
1	2253	09.21.2007 10:32 AM	sammy	Akita	5	1	3	1	0	0	2	1	3	1	2	0	2	2	2	2							1.6	0.6	1	2
1	2992	09.29.2007 4:21 PM	Scotty	Akita	5	1	9	1	0	0	2	2	2	1	1	0	2	2	2	1							1	0.8	0	2
1	6092	10.27.2007 4:01 PM	Stella	Akita	5	1	0.7	2	0	0	3	2	1	1	3	0	1	0	2	2							1.4	1.8	1.25	1.67
2	65303	09.03.2008 9:29 AM	Tobi of Kalamalka	Akita	5	1	10	1	0	0	4	2	2	3	2	0	2	0			0	2	2	1	1	0					0.67
1	4144	10.10.2007 8:52 PM	Tora	Akita	5	1	1.4	1	0	3	4	1	3	2	2	2	2	2	2	2							1.4	1.8	1.5	1.67
2	81764	11.17.2008 2:15 PM	Unsha	Akita	5	1	1	2	1	3	2	2	3	2	2	1	2	2			0	1	1	1	0	0					0.5
1	188	08.30.2007 7:12 AM	Yuki	Akita	5	1	4	2	1	3	4	2	2	4	3	1	1	0	1	2							2	1.6	0.25	1.67
1	5114	10.19.2007 5:08 PM	Annett König	Alaskan Malamute	5	1	8	1	0	0	4	2	3	2	3	0	2	1	2	2							0.8	1	0.5	1
3	11859	12.13.2007 7:20 PM	anuk	Alaskan Malamute	5	1	1.3	1	0	1	2	2	3	1	2	2	2	3	2	1	0	2	2	2	0	0	1.8	1.8	1.25	2	0.75
1	4844	10.17.2007 3:38 PM	Bärli	Alaskan Malamute	5	1	5	1	1	1	3	2	3	3	2	2	1	3	1	1							2	1.2	1.5	1.33
1	279	08.30.2007 6:25 PM	Bengal	Alaskan Malamute	5	1	6	1	1	0	4	2	3	2	3	0	2	0	2	2							2	0.4	1.25	1.33
1	9641	11.27.2007 5:01 PM	Diana	Alaskan Malamute	5	1	7	2	1	1	4	2	3	1	3	0	1	1	2	2							1.6	0.4	2	0.67
1	4868	10.17.2007 6:47 PM	Fenja	Alaskan Malamute	5	1	1.8	2	1	3	2	2	3	4	3	2	2	1	2	2							2	1.6	2	1.33
2	56325	07.22.2008 10:45 AM	Jerry	Alaskan Malamute	5	1	5	1	1	0	4	2	3	2	2	0	1	3			0	1	2	2	1	0					0.08
1	11826	12.13.2007 1:38 PM	Laika	Alaskan Malamute	5	1	6	2	1	1	4	2	2	2	2	0	1	0	2	2							1.2	0.4	0.25	2
1	152	08.29.2007 8:05 PM	Layka	Alaskan Malamute	5	1	7	2	1	0	2	2	3	1	1	0	1	2	2	2							1.4	1	1.5	1.67
1	9366	11.25.2007 8:25 PM	Maximus	Alaskan Malamute	5	1	2	1	0	3	3	2	2	2	3	2	2	0	2	2							2	1.2	1.5	1.67
2	95334	01.20.2009 11:05 PM	Moonlight	Alaskan Malamute	5	1	4	1	0	2	2	2	3	1	3	2	1	3			0	1	2	1	1	0					0.17
1	101	08.29.2007 2:06 PM	Nome	Alaskan Malamute	5	1	7	1	1	0	4	1	3	2	3	0	1	1	2	2							2	2	1.75	0.67
2	94667	01.16.2009 4:04 PM	Petra Lunau	Alaskan Malamute	5	1	2	1	0	1	2	2	3	1	2	0	1	3			0	2	2	1	0	0					1
2	56644	07.22.2008 3:54 PM	Pinsel	Alaskan Malamute	5	1	7	1	1	0	4	2	3	2	3	0	2	0			1	1	2	1	1	0					0.92
2	57140	07.24.2008 12:32 PM	Sancezz	Alaskan Malamute	5	1	3	1	1	2	2	2	2	2	1	1	2	3			0	2	2	2	1	1					0.5
2	90405	12.24.2008 8:57 PM	Shadow	Alaskan Malamute	5	1	0.6	1	0	0	2	2	3	1	3	0	1	2			1	2	2	2	0	0					1.17
1	8446	11.17.2007 10:56 PM	Wolf	Alaskan Malamute	5	1	9	1	1	0	4	1	3	1	2	0	1	0	2	2							1.4	1.4	1.25	1.67
2	73908	10.14.2008 2:43 PM	Yukon	Alaskan Malamute	5	1	0.4	1	0	0	3	2	1	1	3	1	1	0			0	2	2	1	1	0					1.33
1	12713	12.26.2007 11:31 AM	Arco	Alpine Dachsbracke	6	1	0.6	1	0	2	3	2	3	4	3	0	3	1	2	2							2	2	2	1.33
1	3211	10.01.2007 10:06 PM	arris	Alpine Dachsbracke	6	1	4	1	0	3	2	2	3	3	2	2	3	1	2	2							1.6	1.6	0	1.67
2	74345	10.16.2008 12:30 AM	Chonn	Alpine Dachsbracke	6	1	7	1	0	3	1	1	3	4	3	2	3	1			1	2	3	1	0	0					0.17
1	4260	10.11.2007 11:37 PM	dax	Alpine Dachsbracke	6	1	15	1	1	3	3	1	3	3	3	0	2	1	1	1							1.4	0	0	1
1	1754	09.18.2007 5:51 PM	otto	Alpine Dachsbracke	6	1	2	1	1	0	4	2	2	2	2	0	1	1	2	2							0.6	1.6	0.5	2
2	95183	01.19.2009 5:05 PM	Albert	Altdeutscher Hütehund	-	1	0.25	1	0	2	2	2	3	4	3	2	1	0			1	2	1	2	0	0					1
1	8697	11.20.2007 11:06 AM	Alma	Altdeutscher Hütehund	-	1	1	2	0	1	2	1	4	3	2	0	1	3	2	2							1.6	2	1.5	1.67
1	7764	11.11.2007 12:31 PM	Barnie	Altdeutscher Hütehund	-	1	4	1	0	0	2	2	2	1	2	0	2	1	1	1							0.6	1.8	1.25	2
2	95312	01.20.2009 6:21 PM	biggy	Altdeutscher Hütehund	-	1	4	2	0	2	3	2	3	1	2	2	2	2			0	2	2	2	0	0					0.58
2	65467	09.03.2008 5:57 PM	Bod	Altdeutscher Hütehund	-	1	4	1	0	1	2	1	3	2	1	0	3	1			0	2	2	1	0	0					0.42
2	80303	11.12.2008 10:03 PM	buma	Altdeutscher Hütehund	-	1	4	1	0	1	4	2	2	2	3	0	1	1			0	1	2	1	0	0					0.08
2	56724	07.22.2008 7:24 PM	chester	Altdeutscher Hütehund	-	1	1.5	1	0	2	2	2	3	1	3	1	2	3			1	2	1	2	1	0					0.67
1	8510	11.18.2007 6:26 PM	Chico	Altdeutscher Hütehund	-	1	4	1	0	0	2	1	3	2	2	1	2	2	2	1							1.6	2	1.5	2
2	63484	08.24.2008 5:42 PM	Digger	Altdeutscher Hütehund	-	1	0.25	1	0	1	2	2	3	2	3	1	1	0			1	2	1	2	0	0					0.67
1	7051	11.04.2007 11:45 AM	Dingo	Altdeutscher Hütehund	-	1	10	1	1	3	4	2	3	2	2	2	1	0	2	1							0	2	1.25	0.67
2	77286	10.29.2008 3:00 PM	eik	Altdeutscher Hütehund	-	1	2	1	1	0	2	2	1	1	3	0	2	0			1	3	3	2	1	0					1.42
1	2335	09.22.2007 12:21 PM	Fina	Altdeutscher Hütehund	-	1	0.1	2	0	0	1	2	3	4	3	0	2	0	2	2							1.6	1.2	2	0
2	76146	10.23.2008 1:35 PM	Henry	Altdeutscher Hütehund	-	1	0.4	1	0	1	2	2	2	4	2	0	3	2			0	1	2	2	1	0					0.5
2	78209	11.02.2008 9:09 PM	Isy	Altdeutscher Hütehund	-	1	5.5	2	1	0	4	2	2	3	2	0	2	2			0	1	2	1	0	1					0.58
1	9964	11.29.2007 7:54 PM	Jule	Altdeutscher Hütehund	-	1	2	2	1	3	2	2	3	2	2	1	1	3	1	2							0.4	2	0.75	0.67
2	62324	08.19.2008 8:50 AM	Jule	Altdeutscher Hütehund	-	1	4	2	1	0	4	2	2	4	2	2	2	3			0	1	2	1	1	0					0.42
1	10120	12.01.2007 12:19 AM	Juma	Altdeutscher Hütehund	-	1	4	2	1	2	2	2	2	3	3	2	2	3	2	2							1.2	2	1.5	0.33
2	65910	09.05.2008 8:28 AM	Kessy	Altdeutscher Hütehund	-	1	11	2	1	0	4	2	2	2	2	0	2	0			0	1	2	1	1	1					0.42
1	13219	12.31.2007 7:21 PM	kimba	Altdeutscher Hütehund	-	1	0.3	2	0	2	3	1	3	2	3	1	1	0	2	2							2	1.6	2	1.33
2	57128	07.24.2008 10:59 AM	Kimba	Altdeutscher Hütehund	-	1	1	1	1	0	3	2	2	3	2	0	2	1			0	1	3	2	0	0					0.67
1	1173	09.13.2007 9:42 AM	Leon	Altdeutscher Hütehund	-	1	1.3	1	0	2	2	1	3	2	1	2	2	2	2	2							1	2	0.25	2
2	61072	08.13.2008 9:07 PM	Leska	Altdeutscher Hütehund	-	1	11	2	0	3	2	2	3	3	2	0	3	0			0	1	2	1	0	0					0.5
2	91763	01.02.2009 2:03 PM	Lessi	Altdeutscher Hütehund	-	1	2.5	2	0	1	2	2	2	4	2	0	2	2			0	2	2	1	1	0					0.33
2	55906	07.19.2008 2:41 PM	Lord Nelson	Altdeutscher Hütehund	-	1	1.5	1	0	3	3	2	3	3	2	1	2	1			0	1	1	2	1	1					0.75
2	79440	11.08.2008 8:06 PM	Lotte	Altdeutscher Hütehund	-	1	6	2	0	1	4	2	2	2	3	1	2	0			0	1	2	1	0	0					0.92
2	79362	11.07.2008 8:12 PM	Luna	Altdeutscher Hütehund	-	1	1.5	2	0	0	3	2	3	3	3	0	1	1			1	2	2	1	1	1					0.83
2	58745	08.01.2008 1:15 PM	martha	Altdeutscher Hütehund	-	1	0.75	2	0	1	2	2	3	3	3	0	2	2			0	1	2	1	1	0					0.42
1	3134	10.01.2007 9:57 AM	mäx	Altdeutscher Hütehund	-	1	2	1	1	2	3	2	3	3	2	0	1	1	2	2							0.2	0.8	2	1.67
2	76629	10.26.2008 2:22 PM	Medi	Altdeutscher Hütehund	-	1	1	2	0	1	2	2	3	2	2	1	2	3			0	1	2	1	0	0					0.42
2	66949	09.11.2008 11:37 AM	meier	Altdeutscher Hütehund	-	1	7	1	0	3	2	2	3	2	3	2	1	2			1	1	2	1	1	0					0.33
1	13491	01.03.2008 8:17 PM	Miko	Altdeutscher Hütehund	-	1	3	1	0	3	4	2	3	3	3	0	1	0	2	2							0.4	1.6	1.5	1
2	76545	10.25.2008 12:10 PM	momo	Altdeutscher Hütehund	-	1	3	2	0	3	3	1	2	4	2	0	3	3			0	3	1	1	0	0					1.75
2	68742	09.20.2008 3:45 PM	moppi	Altdeutscher Hütehund	-	1	2.5	1	0	0	2	1	3	2	2	0	2	2			0	1	2	2	1	0					0.33
1	3948	10.08.2007 10:39 PM	nanuk	Altdeutscher Hütehund	-	1	2	2	0	1	4	2	3	4	2	0	2	2	2	2							0.4	2	0.5	1
1	7776	11.11.2007 1:52 PM	Paula	Altdeutscher Hütehund	-	1	2	2	0	0	2	2	1	1	3	0	3	3	1	2							1.2	2	0.5	1.67
1	13630	01.05.2008 7:53 AM	Prondo	Altdeutscher Hütehund	-	1	1.5	1	0	1	2	2	3	3	2	0	1	2	2	2							1.6	2	1.5	2
2	52923	07.04.2008 5:31 PM	Ronja	Altdeutscher Hütehund	-	1	8	2	0	0	4	2	2	2	2	0	1	0			0	1	3	2	1	0					0.75
2	67375	09.13.2008 1:07 PM	rudy	Altdeutscher Hütehund	-	1	1.5	1	0	2	2	2	3	4	2	1	1	2			0	1	2	1	0	0					1
1	4406	10.13.2007 9:55 PM	sam	Altdeutscher Hütehund	-	1	2	1	1	0	2	2	2	3	3	1	1	0	2	2							0.4	1.6	0.75	2
1	7527	11.08.2007 5:40 PM	Samson	Altdeutscher Hütehund	-	1	5	1	0	3	2	2	3	4	3	2	2	0	1	2							1.8	1.4	1.5	2
1	3549	10.04.2007 9:23 PM	sepp	Altdeutscher Hütehund	-	1	3	1	1	1	4	2	1	1	3	2	1	1	1	1							2	0.6	1.75	2
2	70343	09.29.2008 12:53 PM	Sesam	Altdeutscher Hütehund	-	1	1.75	1	0	1	3	2	2	3	2	0	2	3			0	2	2	1	1	1					0.5
1	8656	11.19.2007 8:53 PM	Taran	Altdeutscher Hütehund	-	1	6	1	0	3	2	2	3	2	3	1	2	3	1	2							0.8	2	1.25	1.67
1	5143	10.19.2007 7:54 PM	Teddy	Altdeutscher Hütehund	-	1	4	1	1	1	2	2	3	1	2	2	2	3	2	2							0.6	1.8	0.75	1
1	4902	10.17.2007 11:36 PM	tenzing	Altdeutscher Hütehund	-	1	4.5	1	0	0	2	2	3	4	3	0	2	3	2	2							1.8	2	1.25	1.33
2	58147	07.30.2008 1:35 PM	Vito	Altdeutscher Hütehund	-	1	0.7	1	0	0	2	2	2	3	3	0	1	2			1	1	2	1	1	0					1.08
1	7030	11.04.2007 10:10 AM	Willi	Altdeutscher Hütehund	-	1	1.5	1	0	3	4	1	3	2	2	2	2	1	2	2							0.4	1.6	1	2
2	60672	08.12.2008 8:27 AM	Willi	Altdeutscher Hütehund	-	1	5	1	1	2	3	2	2	2	3	0	2	2			0	2	2	2	1	0					0.25
2	68106	09.17.2008 1:34 PM	Willy	Altdeutscher Hütehund	-	1	5	1	1	0	3	2	3	2	3	1	2	3			1	1	2	1	0	0					0.42
2	93863	01.14.2009 12:44 PM	wolf	Altdeutscher Hütehund	-	1	8	1	0	1	4	1	3	2	3	0	3	0			0	1	1	1	0	0					1.58
2	55353	07.16.2008 9:42 PM	Zora	Altdeutscher Hütehund	-	1	3.5	2	1	2	2	2	3	1	3	0	2	2			1	1	2	1	1	0					0.83
2	56040	07.20.2008 6:21 PM	Aisha	American Bulldog	-	1	2.5	2	1	1	4	2	2	2	2	0	1	0			0	1	2	2	1	0					0.5
1	94	08.29.2007 1:19 PM	Alpha	American Bulldog	-	1	4	1	0	3	1	2	3	3	3	2	2	3	2	2							1.6	2	1.75	2
1	88	08.29.2007 1:07 PM	anja	American Bulldog	-	1	1.5	1	0	3	2	2	3	2	3	2	2	0	1	1							1.4	2	1.5	0.67
2	74724	10.16.2008 10:07 PM	Archi	American Bulldog	-	1	1.5	1	1	1	4	1	2	2	3	1	2	0			1	1	2	2	1	0					1.5
1	182	08.30.2007 12:23 AM	Ares	American Bulldog	-	1	1	1	0	3	1	2	3	1	3	2	2	0	2	1							2	1.4	2	2
1	122	08.29.2007 3:50 PM	Arisha	American Bulldog	-	1	1.1	2	0	2	2	2	2	3	2	0	2	3	2	2							1.4	2	0.75	2
1	96	08.29.2007 1:22 PM	Arthur	American Bulldog	-	1	0.8	1	0	3	2	1	2	2	3	0	2	2	2	2							1.2	1.8	1.25	1.67
2	72825	10.09.2008 10:27 PM	Ashkii	American Bulldog	-	1	0.8	1	0	0	3	2	2	3	2	0	1	0			0	2	2	1	0	0					1
2	75443	10.20.2008 9:57 AM	Balou	American Bulldog	-	1	0.5	1	0	0	2	2	2	3	2	0	2	2			0	2	2	2	1	0					0.58
1	9734	11.28.2007 12:01 PM	Balu	American Bulldog	-	1	5	1	0	2	2	1	3	2	2	0	1	1	1	2							1	0.8	0.5	1.67
1	13177	12.31.2007 1:49 PM	Balu	American Bulldog	-	1	5	1	0	3	2	1	3	3	2	2	1	2	2	2							1.4	0.8	1.5	1.67
1	141	08.29.2007 6:20 PM	bertha	American Bulldog	-	1	2.5	2	1	1	4	1	2	3	3	0	1	1	2	2							1.8	1.4	1.25	2
1	344	08.31.2007 12:58 PM	Bertha	American Bulldog	-	1	2.5	2	1	1	4	2	2	3	2	1	2	0	2	2							2	1.4	1.5	2
1	334	08.31.2007 11:38 AM	Blue	American Bulldog	-	1	5	1	1	3	3	2	2	2	3	2	2	2	2	2							0.4	1.6	0.75	0.67
1	308	08.30.2007 11:02 PM	Bolle	American Bulldog	-	1	2.5	1	1	3	4	1	3	2	3	0	1	0	2	2							1.4	1.6	2	1.33
1	275	08.30.2007 5:48 PM	Bondage	American Bulldog	-	1	2	1	0	3	2	2	2	2	2	1	2	2	2	2							1.8	2	0.25	1.67
1	7746	11.11.2007 8:58 AM	Boomer	American Bulldog	-	1	0.2	1	0	1	2	2	2	3	2	0	2	0	2	2							1.2	1.4	1.75	2
1	6665	11.01.2007 8:46 AM	Boris	American Bulldog	-	1	0.6	1	0	2	2	1	3	1	2	0	1	1	2	2							1.6	1.8	2	2
2	62663	08.20.2008 5:30 PM	Bosse	American Bulldog	-	1	0.5	1	0	2	2	2	3	2	2	0	1	1			0	1	2	1	1	0					0.5
1	1468	09.16.2007 10:59 AM	branco	American Bulldog	-	1	0.9	1	0	0	3	1	2	3	2	0	2	2	1	2							1.2	1.4	2	0.67
1	5444	10.22.2007 7:25 PM	Bullwei	American Bulldog	-	1	0.4	1	0	0	2	1	2	3	2	0	1	0	2	2							1.8	1.6	2	1.33
2	90864	12.28.2008 10:10 AM	buma	American Bulldog	-	1	0.6	1	0	2	2	1	3	1	3	0	2	1			0	1	2	1	0	0					1.17
1	9736	11.28.2007 12:04 PM	Cano	American Bulldog	-	1	3	1	0	2	2	2	2	3	2	1	2	2	2	2							1.4	1.4	1.5	1.67
2	57071	07.24.2008 1:19 AM	Cap	American Bulldog	-	1	6	2	0	3	4	2	3	3	2	1	2	0			0	1	2	1	1	0					0.67
1	339	08.31.2007 12:05 PM	Chestnutas Little Fox	American Bulldog	-	1	2.3	1	0	3	2	1	3	2	2	0	2	3	2	2							1.6	1.8	1	2
1	4516	10.14.2007 8:16 PM	Chicco	American Bulldog	-	1	0.9	1	0	1	2	2	2	3	2	0	3	2	2	2							1.4	1.8	1.5	2
1	148	08.29.2007 7:24 PM	chicka	American Bulldog	-	1	0.4	2	0	2	2	1	2	1	3	0	1	1	2	2							1.2	2	2	2
1	299	08.30.2007 9:07 PM	Chimak	American Bulldog	-	1	5	1	1	1	2	2	3	1	2	2	2	3	2	2							1.2	2	1.75	2
1	9558	11.26.2007 10:19 PM	Cooper	American Bulldog	-	1	1.1	1	0	2	2	2	2	3	3	0	1	2	2	2							1.6	1.4	2	2
1	90	08.29.2007 1:10 PM	Countrygirl	American Bulldog	-	1	5	2	0	2	1	2	3	3	2	2	2	0	2	1							2	1.4	1.75	2
2	72046	10.07.2008 2:40 PM	davinci	American Bulldog	-	1	2	1	0	0	2	1	2	2	2	0	2	2			0	1	2	1	0	0					0.33
1	297	08.30.2007 8:59 PM	Dicker	American Bulldog	-	1	5	1	1	1	2	2	3	1	2	1	2	2	2	2							0.8	2	1.5	2
1	256	08.30.2007 4:08 PM	Diva	American Bulldog	-	1	3	2	0	3	3	2	2	3	2	2	3	0	2	1							1	1.6	1.5	1
1	421	09.02.2007 12:09 AM	Duke	American Bulldog	-	1	1	1	0	2	2	2	3	3	3	1	1	1	2	1							1.8	1.6	1.25	2
1	2261	09.21.2007 12:39 PM	Dyson	American Bulldog	-	1	0.7	1	0	0	3	2	3	1	3	0	1	1	1	2							1.4	1.2	2	1.67
1	180	08.30.2007 12:12 AM	Enji	American Bulldog	-	1	3	2	0	3	2	2	3	1	3	2	2	1	2	1							1.8	1.8	1.5	2
2	91308	12.30.2008 6:10 PM	fff	American Bulldog	-	1	0.4	1	0	2	2	1	3	3	2	0	1	2			0	2	3	2	1	0					0.75
1	100	08.29.2007 2:04 PM	Fox	American Bulldog	-	1	2	1	0	1	2	2	3	2	1	0	1	1	2	2							2	1.6	1.25	2
1	444	09.02.2007 2:48 PM	geronimo	American Bulldog	-	1	0.8	1	0	1	2	1	3	3	2	2	2	0	2	2							1.4	1.6	2	2
1	1599	09.17.2007 3:21 PM	Gizmo	American Bulldog	-	1	8	1	0	2	2	2	3	3	3	0	1	1	1	2							0.8	1.6	0.5	0
1	6296	10.29.2007 1:47 PM	Gordon	American Bulldog	-	1	0.8	1	0	3	2	2	2	1	2	0	2	1	1	2							1.2	1.8	1.75	1.33
2	61887	08.16.2008 11:34 AM	Hampton	American Bulldog	-	1	1	1	1	0	2	2	2	3	3	1	1	0			1	2	3	1	1	0					0.83
1	10514	12.03.2007 6:26 PM	hund	American Bulldog	-	1	1	1	1	2	3	2	3	3	3	1	1	1	1	2							0.2	1.6	1.75	2
2	60457	08.10.2008 5:37 PM	Igraine	American Bulldog	-	1	2	2	0	3	2	2	3	3	3	2	2	3			1	1	2	1	1	0					0.75
1	132	08.29.2007 5:20 PM	Jayz	American Bulldog	-	1	0.8	1	0	0	2	1	2	2	2	0	2	1	2	2							2	2	2	1.33
1	268	08.30.2007 5:19 PM	joy	American Bulldog	-	1	1	2	0	1	2	1	2	2	3	1	2	2	2	2							2	1.6	2	2
1	266	08.30.2007 5:02 PM	Kira	American Bulldog	-	1	0.7	2	0	3	3	2	2	1	2	0	1	2	2	2							1.4	2	2	1
2	62323	08.19.2008 8:40 AM	Lana	American Bulldog	-	1	5	2	1	1	4	2	3	2	2	2	2	0			0	1	3	2	0	0					0.42
1	300	08.30.2007 9:25 PM	Lennox	American Bulldog	-	1	0.9	1	0	1	3	1	3	1	2	0	2	2	1	1							1	1.4	1.25	0.67
1	260	08.30.2007 4:30 PM	liselotte	American Bulldog	-	1	4	2	1	1	2	1	2	3	3	0	2	3	2	2							1.2	1.6	1.5	1.67
1	13558	01.04.2008 2:26 PM	Lola	American Bulldog	-	1	3	2	0	2	3	2	3	3	3	0	1	3	1	2							1.6	1.6	0.5	0
1	10547	12.03.2007 8:45 PM	Lyndon	American Bulldog	-	1	0.3	1	0	1	2	1	3	4	2	0	2	1	2	2							1.4	1.4	1.75	1.67
1	318	08.31.2007 8:10 AM	Maja	American Bulldog	-	1	1.5	2	1	1	2	2	2	1	2	0	1	2	2	2							1.4	1.8	2	2
2	71389	10.03.2008 10:28 AM	Maja	American Bulldog	-	1	1	2	0	1	2	2	2	2	2	0	2	2			0	2	2	1	1	1					1
1	11988	12.15.2007 6:57 PM	Marry	American Bulldog	-	1	0.6	2	0	3	2	2	3	3	2	2	1	2	2	2							1.8	2	1.5	2
1	4945	10.18.2007 1:54 PM	merlin	American Bulldog	-	1	5	1	1	2	2	2	3	1	3	0	2	3	2	2							0.6	0.2	1.5	0.67
1	248	08.30.2007 3:44 PM	Moesha	American Bulldog	-	1	0.4	2	0	1	2	1	2	2	2	1	2	1	2	2							2	2	1.5	2
2	66942	09.11.2008 11:01 AM	momo	American Bulldog	-	1	1.25	2	0	0	2	1	3	3	1	0	3	0			0	1	2	1	1	1					0.83
1	382	09.01.2007 8:38 AM	Patch	American Bulldog	-	1	2	2	0	0	3	2	3	1	2	1	1	1	1	2							1.6	1.8	2	2
1	12780	12.27.2007 3:12 AM	patsy	American Bulldog	-	1	6	2	0	2	4	2	2	2	3	0	1	0	2	2							2	1.6	1.5	0.67
2	66275	09.07.2008 1:34 PM	Paul	American Bulldog	-	1	5	1	0	0	4	1	2	1	3	0	1	1			0	1	2	1	1	1					0.25
1	311	08.31.2007 12:31 AM	Phoebe	American Bulldog	-	1	7	2	1	3	2	1	3	2	3	2	3	2	2	2							2	2	2	2
1	113	08.29.2007 2:57 PM	Punkie	American Bulldog	-	1	4	2	0	2	2	2	3	3	2	2	2	0	2	1							1.6	1.4	0	2
1	9890	11.29.2007 9:35 AM	Rambo	American Bulldog	-	1	0.9	1	0	3	3	1	3	1	3	0	1	0	2	2							0.6	1.6	1	0.67
1	104	08.29.2007 2:15 PM	Sam	American Bulldog	-	1	0.7	1	0	3	2	2	2	3	3	2	3	2	2	2							0	1.6	1.25	0.67
1	251	08.30.2007 3:53 PM	sarah	American Bulldog	-	1	3	2	0	1	2	2	2	3	2	0	2	2	1	2							0	1.4	0.75	1.33
1	11531	12.11.2007 12:08 AM	Sony	American Bulldog	-	1	1.3	1	0	0	2	1	2	2	3	0	2	1	2	2							1	1.6	2	2
1	140	08.29.2007 6:18 PM	Suki	American Bulldog	-	1	0.8	2	0	0	2	1	2	3	3	0	1	3	2	2							1.4	2	1.75	0.67
1	181	08.30.2007 12:19 AM	Tattoo	American Bulldog	-	1	3	2	0	3	2	2	3	1	3	2	2	0	2	1							2	0.8	1.25	2
1	1054	09.12.2007 11:23 AM	thys	American Bulldog	-	1	0.4	1	0	1	2	2	3	2	3	0	1	0	2	2							1.8	1.4	1.5	1.67
1	5767	10.25.2007 1:44 AM	tyson	American Bulldog	-	1	0.8	1	0	2	3	1	2	1	3	1	1	1	2	2							1.2	1.8	1.5	2
1	183	08.30.2007 12:27 AM	Wahja	American Bulldog	-	1	1	2	0	3	2	2	3	1	3	2	2	0	2	1							0.8	1.4	1.75	1.67
1	92	08.29.2007 1:14 PM	White An	American Bulldog	-	1	0.9	2	0	3	3	2	2	1	3	1	1	1	2	2							0.2	1.6	2	0.33
1	247	08.30.2007 3:26 PM	Wizzard	American Bulldog	-	1	1.3	1	0	0	2	1	2	2	2	1	2	2	2	2							0.2	1.6	1.75	1.33
1	276	08.30.2007 5:56 PM	Zeus	American Bulldog	-	1	1	1	0	1	2	2	2	1	2	0	2	1	2	2							0.4	1	1	1
1	13115	12.30.2007 6:15 PM	Archie	American Cocker Spaniel	8	1	1	1	0	0	2	2	3	2	3	0	1	0	2	1							1	1.6	1.75	1.67
1	1679	09.18.2007 8:57 AM	arni	American Cocker Spaniel	8	1	13	1	0	0	3	2	3	4	2	1	1	0	2	2							1.6	1.2	1.75	1.67
2	69245	09.23.2008 11:07 AM	Baily	American Cocker Spaniel	8	1	5	1	1	2	4	2	3	2	1	2	2	1			0	1	2	1	1	1					1.42
1	12954	12.29.2007 7:45 AM	Cherie	American Cocker Spaniel	8	1	6	2	0	2	2	1	3	3	3	0	2	0	1	2							1.6	0.8	1.25	1.67
1	5085	10.19.2007 2:01 PM	Chili	American Cocker Spaniel	8	1	4	2	1	1	4	2	3	2	2	0	1	0	2	2							1.4	1	1.25	2
1	6704	11.01.2007 1:37 PM	Cindy	American Cocker Spaniel	8	1	7	2	1	1	4	2	2	2	2	0	1	1	2	2							1	1.6	1.5	2
1	13295	01.01.2008 8:08 PM	Fritzi	American Cocker Spaniel	8	1	3	2	0	3	4	1	3	2	3	0	2	2	1	2							1.6	1.2	1.25	1.33
1	7263	11.06.2007 10:41 AM	geky	American Cocker Spaniel	8	1	6	1	0	0	3	2	3	4	3	0	1	0	2	2							1.4	1.4	1	2
1	6889	11.03.2007 8:27 AM	Keegan	American Cocker Spaniel	8	1	13	1	0	0	2	2	2	2	3	0	1	0	2	1							1.2	1.2	0.25	1.67
1	5593	10.23.2007 9:02 PM	Mario	American Cocker Spaniel	8	1	8	1	1	2	4	1	3	2	2	0	1	0	2	2							1.6	1.6	1.75	2
1	7522	11.08.2007 4:40 PM	Mino	American Cocker Spaniel	8	1	1.2	1	0	0	2	1	1	1	3	0	2	0	1	2							1.2	1.2	2	1
1	1230	09.13.2007 8:24 PM	Pruna	American Cocker Spaniel	8	1	8	2	0	1	4	1	2	2	1	0	2	0	2	1							2	0.6	0	1.33
1	6171	10.28.2007 10:57 AM	Roxy	American Cocker Spaniel	8	1	8	2	1	0	3	2	2	2	2	1	2	1	2	1							1	1.2	1.75	1.33
1	10142	12.01.2007 11:34 AM	sammy	American Cocker Spaniel	8	1	1.5	1	0	1	3	2	3	2	2	0	1	0	2	1							1.6	2	1.5	1.67
1	2223	09.20.2007 11:29 PM	tommy	American Cocker Spaniel	8	1	3.5	1	0	0	4	2	3	2	3	0	2	2	2	2							0.4	1.6	0	1
1	8701	11.20.2007 11:24 AM	Tyler	American Cocker Spaniel	8	1	0.3	1	0	3	2	2	3	3	3	1	1	0	2	2							0.4	1.6	1.5	1.67
1	5622	10.23.2007 10:55 PM	Vossi	American Cocker Spaniel	8	1	8	1	0	0	3	2	3	3	2	0	2	3	2	1							1.6	1.4	1.75	2
1	11520	12.10.2007 10:23 PM		American Staffordshire Terrier	3	1	12	2	1	0	4	2	2	3	3	2	2	0	2	2							2	2	1	1.33
2	92085	01.04.2009 8:43 PM	>Shiba	American Staffordshire Terrier	3	1	14	2	1	0	4	2	3	4	2	0	1	1			0	1	1	1	0	1					0.75
2	54628	07.13.2008 5:48 PM	Adria	American Staffordshire Terrier	3	1	11	2	1	0	2	2	2	2	3	0	1	0			1	1	3	1	1	0					0.25
1	4915	10.18.2007 9:51 AM	Alize	American Staffordshire Terrier	3	1	0.6	2	0	0	2	2	2	3	2	0	1	1	2	2							1.2	1.8	2	2
1	7531	11.08.2007 6:07 PM	Amaron	American Staffordshire Terrier	3	1	4	1	1	0	4	2	2	2	3	0	1	1	1	2							2	1.6	1.5	2
2	66250	09.07.2008 10:35 AM	Amily	American Staffordshire Terrier	3	1	10	2	1	0	2	2	2	1	3	0	1	3			1	1	2	2	1	0					0.25
1	12909	12.28.2007 5:37 PM	Angel	American Staffordshire Terrier	3	1	3	2	1	0	2	2	2	3	2	0	1	2	2	2							1.4	1.4	1.75	2
2	63470	08.24.2008 4:27 PM	Angi	American Staffordshire Terrier	3	1	8	2	0	0	4	2	2	3	2	0	1	0			0	2	2	1	1	1					0.75
2	54870	07.15.2008 8:30 AM	anni	American Staffordshire Terrier	3	1	11	2	1	0	4	2	2	2	2	2	2	1			0	1	2	1	1	0					0.67
1	9658	11.27.2007 6:22 PM	Baby	American Staffordshire Terrier	3	1	2.5	1	0	1	3	2	2	3	2	0	2	0	2	2							1.2	1.6	1.75	2
3	1536	09.16.2007 9:32 PM	Bakira	American Staffordshire Terrier	3	1	1	2	0	1	3	2	2	3	2	0	1	0	2	2	0	1	2	1	1	0	0.8	2	2	1	0.67
1	11901	12.14.2007 2:29 PM	baxter	American Staffordshire Terrier	3	1	1.5	1	0	2	2	1	3	1	2	1	1	2	2	1							1.6	1.8	2	2
2	54807	07.14.2008 6:15 PM	Bodo	American Staffordshire Terrier	3	1	5	1	1	3	4	2	3	3	2	0	2	0			0	2	2	1	0	0					0.33
1	8762	11.20.2007 7:08 PM	Bubba	American Staffordshire Terrier	3	1	1	1	0	0	2	1	2	1	2	0	1	0	2	2							1	1.6	1	2
1	11545	12.11.2007 10:33 AM	Buddy	American Staffordshire Terrier	3	1	0.4	1	0	0	2	1	3	1	3	0	1	2	2	1							2	1.6	0.75	1
1	10344	12.02.2007 5:14 PM	Buffy	American Staffordshire Terrier	3	1	8	2	1	1	2	2	2	1	2	0	2	3	1	1							0.8	0.8	0.25	1.33
2	73474	10.12.2008 3:41 PM	Casull	American Staffordshire Terrier	3	1	0.6	1	0	0	2	2	2	3	2	0	1	0			0	1	2	1	0	0					1.17
1	12041	12.16.2007 2:25 PM	chila	American Staffordshire Terrier	3	1	3	2	0	0	2	2	2	3	3	1	1	0	1	2							1.4	2	0.5	2
1	5151	10.19.2007 8:25 PM	Chillly	American Staffordshire Terrier	3	1	7	2	0	1	2	2	2	3	2	1	2	3	2	1							1.6	1.4	1	2
1	7534	11.08.2007 6:20 PM	chip	American Staffordshire Terrier	3	1	1	1	1	0	2	1	3	1	1	1	1	0	2	2							2	1.8	1.25	1.33
1	7721	11.10.2007 8:33 PM	Diabolo	American Staffordshire Terrier	3	1	5	1	1	1	2	1	2	3	2	0	1	0	2	2							2	1.8	0.75	1.67
1	4154	10.11.2007 7:16 AM	diego	American Staffordshire Terrier	3	1	0.3	1	0	1	2	2	3	1	1	0	3	0	2	2							2	1.6	1.75	2
1	12634	12.24.2007 4:46 PM	Digger	American Staffordshire Terrier	3	1	3	1	0	0	4	1	3	1	1	0	1	1	2	1							0.6	1	1	2
1	11956	12.15.2007 1:44 AM	Don	American Staffordshire Terrier	3	1	2	1	1	1	4	1	3	1	2	2	1	0	1	2							1.6	1.4	1.25	1.67
1	121	08.29.2007 3:41 PM	Don	American Staffordshire Terrier	3	1	4	1	0	0	2	2	3	2	1	0	1	1	2	2							1.8	2	1.5	2
1	9665	11.27.2007 7:35 PM	Dusty	American Staffordshire Terrier	3	1	2	1	0	2	2	2	2	3	3	0	1	3	1	2							1.6	1.6	1.5	2
1	8850	11.21.2007 2:20 PM	Dusty	American Staffordshire Terrier	3	1	5	1	1	0	4	2	2	1	3	1	2	3	2	2							2	1	0.5	1.67
2	90804	12.27.2008 8:33 PM	Face	American Staffordshire Terrier	3	1	0.7	2	0	1	2	2	3	1	3	0	1	0			0	1	2	2	1	0					0.83
2	76671	10.26.2008 8:35 PM	felix	American Staffordshire Terrier	3	1	11	1	0	1	4	1	3	1	3	0	1	1			0	1	2	2	1	1					0.92
1	1961	09.19.2007 6:05 PM	Fifty	American Staffordshire Terrier	3	1	0.4	1	0	3	2	2	2	3	3	0	1	2	2	2							1.6	1.6	2	2
1	6290	10.29.2007 12:43 PM	Gina	American Staffordshire Terrier	3	1	5	2	1	0	4	2	2	3	1	0	1	1	2	2							1.2	2	1.25	2
2	71654	10.05.2008 6:59 PM	Ginger	American Staffordshire Terrier	3	1	3	2	1	3	4	1	3	2	3	0	1	0			1	1	2	1	1	1					0.58
1	8822	11.21.2007 10:41 AM	Gino	American Staffordshire Terrier	3	1	1	1	0	0	2	1	2	2	1	0	3	0	2	2							0.2	1.8	1.75	1.33
1	2949	09.28.2007 10:26 PM	gino	American Staffordshire Terrier	3	1	2	1	1	1	2	2	2	2	2	0	2	2	1	2							0.6	1	1	2
1	6719	11.01.2007 2:51 PM	Goran	American Staffordshire Terrier	3	1	1.5	1	0	3	2	1	2	2	3	0	2	2	2	2							2	2	2	1.67
1	12222	12.18.2007 3:03 PM	Happy	American Staffordshire Terrier	3	1	10	2	1	2	4	1	3	1	2	0	1	0	1	1							1	1	1.5	1.33
2	92090	01.04.2009 9:25 PM	ibo	American Staffordshire Terrier	3	1	0.8	1	0	1	2	2	1	1	3	1	3	0			0	1	2	1	1	1					1.08
1	8373	11.17.2007 12:04 PM	janna	American Staffordshire Terrier	3	1	10	2	0	0	2	2	2	4	2	0	1	0	1	1							0.6	1.4	0.25	2
2	91032	12.29.2008 12:03 PM	Judy	American Staffordshire Terrier	3	1	12	2	1	0	3	1	3	1	2	0	1	0			0	1	2	1	0	0					0.42
1	9621	11.27.2007 2:52 PM	kassandra	American Staffordshire Terrier	3	1	12	2	0	2	2	2	3	4	3	1	1	1	1	2							1.8	2	1.25	2
1	12152	12.17.2007 5:59 PM	Kiki	American Staffordshire Terrier	3	1	0.6	2	0	0	2	2	2	2	1	0	1	0	2	2							2	1.8	1.5	1.67
1	4440	10.14.2007 12:28 PM	Lea	American Staffordshire Terrier	3	1	11	2	0	0	4	2	3	4	2	0	2	0	2	2							1.8	1.8	1	1.67
1	11471	12.10.2007 5:17 PM	leila	American Staffordshire Terrier	3	1	5	2	0	0	2	1	2	1	3	0	1	0	2	2							1	1.8	1	1.33
1	9113	11.23.2007 7:46 PM	lieschen	American Staffordshire Terrier	3	1	1.5	2	0	3	2	2	2	2	2	2	2	0	2	2							1.8	2	1	1.67
1	9119	11.23.2007 8:43 PM	Lisa	American Staffordshire Terrier	3	1	7	2	1	3	4	2	3	4	2	1	2	2	2	2							2	1	2	1.67
2	93160	01.09.2009 11:46 PM	man	American Staffordshire Terrier	3	1	2.5	1	0	1	3	1	3	1	3	1	2	3			1	2	2	1	1	0					1.08
3	2286	09.21.2007 6:11 PM	Mex	American Staffordshire Terrier	3	1	8	1	1	3	4	2	2	4	2	2	1	1	2	1	0	2	2	1	0	1	2	1.4	1.5	1	0.42
1	10227	12.01.2007 8:35 PM	Monty	American Staffordshire Terrier	3	1	11	1	0	0	2	2	3	3	2	0	3	1	2	1							1.2	1.6	0.25	2
2	62984	08.21.2008 9:22 PM	Neo	American Staffordshire Terrier	3	1	1	1	0	2	2	2	2	2	2	1	2	1			0	2	2	1	0	0					0.83
1	5399	10.22.2007 1:13 PM	Nero	American Staffordshire Terrier	3	1	2	1	1	0	4	2	2	2	2	0	2	0	2	2							1	2	1.75	0.67
2	65284	09.03.2008 8:58 AM	Odin	American Staffordshire Terrier	3	1	0.7	1	0	0	2	2	2	3	2	0	1	0			0	1	2	1	1	1					0.5
1	6807	11.02.2007 12:10 PM	Otto	American Staffordshire Terrier	3	1	2.5	1	0	0	2	2	3	1	2	0	2	3	2	2							2	1.6	2	2
2	56287	07.21.2008 11:21 PM	Pando	American Staffordshire Terrier	3	1	2	2	0	1	3	1	3	2	1	2	2	1			0	1	2	1	0	0					0.42
1	11887	12.14.2007 11:35 AM	prince	American Staffordshire Terrier	3	1	1	1	1	2	3	2	3	2	2	0	2	0	2	2							1.6	1.8	1.75	0.33
2	60303	08.09.2008 1:30 PM	Puma	American Staffordshire Terrier	3	1	2	1	0	1	2	2	1	2	2	0	2	0			0	1	2	1	0	1					1.33
1	11393	12.10.2007 6:19 AM	queen	American Staffordshire Terrier	3	1	10	2	1	0	3	2	3	3	3	2	1	2	2	1							1.2	1.8	0.75	1.67
1	9350	11.25.2007 7:05 PM	Rambo	American Staffordshire Terrier	3	1	4	1	1	1	2	2	2	2	1	0	1	1	2	2							0.8	2	1.5	1
1	9387	11.25.2007 10:07 PM	Rocko	American Staffordshire Terrier	3	1	0.2	1	0	0	2	1	3	3	2	0	2	0	2	2							2	1.8	1	1
1	6929	11.03.2007 2:28 PM	Rocky	American Staffordshire Terrier	3	1	3	1	1	1	3	2	3	2	3	0	1	2	2	2							0	1.2	1.25	2
2	54460	07.11.2008 10:31 PM	rocky	American Staffordshire Terrier	3	1	3	1	1	0	3	2	3	2	3	0	1	2			0	1	2	1	1	0					0.75
2	80934	11.14.2008 8:18 PM	sammy	American Staffordshire Terrier	3	1	1.7	2	0	0	2	2	2	1	3	1	2	0			0	3	2	2	1	1					0.5
1	9118	11.23.2007 8:31 PM	Sheila	American Staffordshire Terrier	3	1	11	2	1	1	3	2	3	2	1	0	1	2	2	2							2	1.4	2	1.33
2	76498	10.24.2008 11:47 PM	shiva	American Staffordshire Terrier	3	1	1	2	0	1	2	2	2	3	3	1	1	0			1	1	2	1	0	0					0.42
1	11499	12.10.2007 8:01 PM	shorty	American Staffordshire Terrier	3	1	0.2	1	0	0	2	2	2	1	2	0	2	0	2	1							1	1.4	0.75	1.67
1	7427	11.07.2007 4:25 PM	Sina	American Staffordshire Terrier	3	1	4	2	0	0	3	2	2	1	2	0	2	1	2	2							1.6	2	1.5	2
2	56156	07.21.2008 2:40 PM	Sita	American Staffordshire Terrier	3	1	4	2	0	1	3	2	2	2	2	0	2	1			1	1	3	1	1	1					0.67
1	7269	11.06.2007 11:40 AM	Sly	American Staffordshire Terrier	3	1	7	1	0	0	4	1	3	1	2	0	1	0	2	2							1.8	1.2	1	2
1	10351	12.02.2007 5:52 PM	Spencer	American Staffordshire Terrier	3	1	8	1	1	1	2	1	3	2	3	0	3	2	2	2							1.8	1.6	0.25	2
1	4417	10.14.2007 1:26 AM	Spike	American Staffordshire Terrier	3	1	1.2	1	0	1	2	1	2	3	3	0	1	0	1	1							0	1.4	1.75	2
1	2332	09.22.2007 11:43 AM	spike	American Staffordshire Terrier	3	1	1.3	1	0	0	3	1	2	2	3	0	2	0	2	2							1	1.4	0.25	2
1	2227	09.21.2007 1:08 AM	Spike	American Staffordshire Terrier	3	1	9	1	0	0	3	2	2	1	3	1	2	2	2	2							2	2	1.5	2
1	10955	12.06.2007 8:09 PM	spike	American Staffordshire Terrier	3	1	12	1	0	0	4	2	3	3	3	0	1	1	2	2							2	2	1	1
2	54769	07.14.2008 2:36 PM	Spike	American Staffordshire Terrier	3	1	2	1	1	2	3	2	2	2	2	0	2	2			0	1	2	1	1	1					0.42
1	1545	09.16.2007 10:05 PM	spikes	American Staffordshire Terrier	3	1	6	1	1	0	4	1	3	2	2	2	2	2	1	2							0.4	1	0.75	1
1	6012	10.26.2007 6:07 PM	teddey	American Staffordshire Terrier	3	1	7	1	1	3	4	2	3	3	2	0	2	1	1	2							1.6	1.4	2	2
1	10674	12.04.2007 6:24 PM	tessa	American Staffordshire Terrier	3	1	3	2	0	1	2	2	2	1	3	1	1	0	2	2							2	2	2	1.33
2	53837	07.09.2008 3:20 PM	Thysson	American Staffordshire Terrier	3	1	8	1	1	0	4	2	2	4	1	0	2	3			0	1	2	2	1	1					0.67
1	6703	11.01.2007 1:37 PM	Tito	American Staffordshire Terrier	3	1	9	1	1	2	4	1	3	3	1	1	1	3	1	2							1.8	2	0.75	1.67
1	2208	09.20.2007 9:14 PM	tom heinen	American Staffordshire Terrier	3	1	2	2	0	3	1	1	3	3	3	2	2	1	1	2							1.8	2	1.5	2
1	1294	09.14.2007 3:24 PM	Tukker	American Staffordshire Terrier	3	1	11	1	1	0	4	2	2	3	2	0	2	2	2	2							2	0.6	0.75	1
1	11893	12.14.2007 1:02 PM	tupak	American Staffordshire Terrier	3	1	0.3	1	0	0	2	1	2	1	2	0	2	0	2	1							1.2	1.2	1.5	2
1	9482	11.26.2007 4:49 PM	Tyson	American Staffordshire Terrier	3	1	1	1	0	0	2	1	2	1	3	1	2	1	2	1							0.2	1.4	1	0.67
2	53830	07.09.2008 2:40 PM	Wanda	American Staffordshire Terrier	3	1	11	2	1	2	2	2	2	2	3	1	2	3			0	1	2	1	1	1					0.42
1	1505	09.16.2007 5:20 PM	Zema	American Staffordshire Terrier	3	1	0.6	2	0	3	2	2	3	2	1	2	1	1	2	2							2	2	1.75	2
2	94387	01.15.2009 7:54 PM	Nika	Andalusian Hound Maneto	-	1	3	1	1	1	4	2	2	4	2	0	1	0			0	1	2	2	0	1					0.58
2	55778	07.18.2008 3:18 PM	atman	Andalusian Podenco	-	1	3	1	0	1	3	2	3	4	1	0	2	3			0	1	2	1	0	1					0.33
1	1923	09.19.2007 3:40 PM	Chili	Andalusian Podenco	-	1	6	2	1	1	4	2	3	2	2	2	1	2	2	1							0.6	1.2	1.25	0.33
2	52928	07.04.2008 6:54 PM	Les	Andalusian Podenco	-	1	3	1	1	1	4	1	3	2	2	1	2	0			0	1	2	1	0	0					1.33
1	4797	10.17.2007 1:42 AM	murphy	Andalusian Podenco	-	1	9	1	0	1	3	2	3	3	2	2	1	0	2	2							1.8	2	1.25	2
1	9396	11.25.2007 10:40 PM	aicha	Appenzell Cattle Dog	2	1	5	2	1	0	2	2	3	3	3	0	2	2	2	2							1.2	1.8	1.5	0.67
1	11245	12.08.2007 8:57 PM	Anton	Appenzell Cattle Dog	2	1	0.5	1	0	0	2	1	2	2	2	0	1	1	2	2							1.4	1.8	1	2
2	57448	07.25.2008 4:55 PM	Anton	Appenzell Cattle Dog	2	1	1.1	1	0	3	2	2	3	2	3	2	2	3			0	2	2	1	1	1					0.67
1	10498	12.03.2007 4:45 PM	Atan	Appenzell Cattle Dog	2	1	5	1	0	0	2	2	3	4	2	0	2	1	2	1							0.4	2	1.25	1.67
2	77543	10.30.2008 5:46 PM	Axel	Appenzell Cattle Dog	2	1	0.7	1	0	2	2	2	3	1	3	0	2	0			0	1	2	1	0	1					0.5
1	6047	10.26.2007 10:02 PM	Balou	Appenzell Cattle Dog	2	1	0.9	1	0	2	2	2	3	4	3	0	2	2	1	1							1.2	1.6	1.5	1
1	4105	10.10.2007 2:16 PM	Bello	Appenzell Cattle Dog	2	1	1	1	0	0	2	2	3	2	2	0	1	2	2	2							1.4	1.2	1.75	1.67
1	2219	09.20.2007 10:28 PM	Bernhard	Appenzell Cattle Dog	2	1	0.9	1	0	3	2	2	3	1	3	0	1	0	2	2							2	1.6	1.5	2
1	11759	12.12.2007 8:29 PM	bosco	Appenzell Cattle Dog	2	1	1	1	0	1	2	2	2	2	2	0	1	0	1	1							0.6	1.2	1	1.33
1	7435	11.07.2007 5:45 PM	Cato	Appenzell Cattle Dog	2	1	2	1	0	1	2	2	3	2	3	0	2	2	2	1							0.2	2	0.5	1
2	53255	07.07.2008 12:31 PM	Charles	Appenzell Cattle Dog	2	1	4.5	1	0	0	2	2	3	2	1	0	1	2			0	1	1	1	1	1					1.17
1	10793	12.05.2007 6:10 PM	Charlie	Appenzell Cattle Dog	2	1	7	1	1	1	2	2	2	1	3	0	2	0	2	1							1.4	1.4	1.75	1.67
2	65147	09.02.2008 4:16 PM	Cher-Sunshine	Appenzell Cattle Dog	2	1	1.5	2	0	3	2	2	3	1	2	2	3	3			0	2	2	1	1	0					0
1	12535	12.22.2007 5:55 PM	dario	Appenzell Cattle Dog	2	1	1.2	1	1	0	2	2	1	2	3	0	1	1	2	1							0.6	1.6	1	1
1	3880	10.08.2007 1:40 PM	Diego	Appenzell Cattle Dog	2	1	0.5	1	0	1	2	2	3	3	2	0	1	1	2	2							1.4	1.8	2	2
2	53295	07.07.2008 4:34 PM	Dina	Appenzell Cattle Dog	2	1	10	2	1	0	3	1	3	2	3	0	1	2			0	1	2	1	0	0					0.58
1	2544	09.24.2007 8:36 PM	Einstein	Appenzell Cattle Dog	2	1	2	1	0	0	2	2	2	2	2	0	3	3	1	2							0.8	1.4	1.25	0.67
2	66840	09.10.2008 9:31 PM	elroy	Appenzell Cattle Dog	2	1	0.4	1	0	1	2	2	3	1	3	0	1	0			1	1	2	1	0	0					0.25
2	92348	01.06.2009 1:51 PM	Gina	Appenzell Cattle Dog	2	1	0.25	2	0	0	2	2	2	2	2	0	2	1			0	1	2	2	1	0					0.75
1	8353	11.17.2007 7:53 AM	Gizmo	Appenzell Cattle Dog	2	1	2	1	1	2	2	1	3	4	3	0	1	1	2	2							0.2	1.8	1	1.67
2	68686	09.19.2008 10:32 PM	Hasso	Appenzell Cattle Dog	2	1	7	1	1	0	2	2	1	1	3	2	2	3			0	2	2	1	1	1					0.5
1	3187	10.01.2007 7:00 PM	Jette	Appenzell Cattle Dog	2	1	2	2	1	0	2	2	3	2	3	0	1	2	1	2							1.4	1.4	2	1.67
2	77231	10.29.2008 12:29 PM	Kalle	Appenzell Cattle Dog	2	1	1.6	1	1	0	2	2	3	2	2	0	3	3			0	2	2	2	0	0					1.08
2	85184	12.03.2008 9:29 AM	Kerberus	Appenzell Cattle Dog	2	1	1	1	0	1	4	2	3	3	3	0	3	1			0	1	2	1	1	0					0.83
2	79644	11.10.2008 3:30 PM	Kimba	Appenzell Cattle Dog	2	1	1.5	1	0	0	2	2	1	2	3	0	1	2			0	1	3	1	1	0					0.25
1	11502	12.10.2007 8:20 PM	kira	Appenzell Cattle Dog	2	1	0.3	2	0	1	2	2	2	2	3	0	2	0	2	2							1	1.8	1.5	1.33
2	78518	11.04.2008 9:10 PM	Kira	Appenzell Cattle Dog	2	1	2	2	0	1	4	2	3	2	3	0	2	0			0	2	2	2	1	0					0.67
1	6964	11.03.2007 6:03 PM	Leo	Appenzell Cattle Dog	2	1	2	1	0	0	4	1	3	1	3	1	3	0	1	2							0.8	1.6	1.5	1
1	9169	11.24.2007 12:30 PM	Lina	Appenzell Cattle Dog	2	1	1.5	2	0	2	4	2	1	3	3	0	2	0	1	1							1	2	1	2
1	12599	12.23.2007 8:27 PM	lisa	Appenzell Cattle Dog	2	1	1	2	1	0	2	2	2	1	3	0	2	2	1	2							1.4	1.8	2	2
1	11593	12.11.2007 5:12 PM	lucky	Appenzell Cattle Dog	2	1	1.6	1	0	0	3	2	1	2	3	0	1	1	2	2							1.6	1.6	1.25	2
2	53264	07.07.2008 1:05 PM	Lucy alias Clea vom Holbach	Appenzell Cattle Dog	2	1	0.75	2	1	2	2	2	3	4	2	0	2	3			0	1	2	2	1	1					0.92
2	95209	01.19.2009 7:44 PM	Mara	Appenzell Cattle Dog	2	1	1.1	2	1	1	2	2	3	2	3	0	1	2			1	1	2	1	0	0					0.75
1	7971	11.13.2007 12:00 PM	Max	Appenzell Cattle Dog	2	1	7	1	0	2	2	2	3	4	3	1	1	3	2	2							1	1.8	0.25	1.33
2	78650	11.05.2008 2:35 PM	max	Appenzell Cattle Dog	2	1	0.4	1	0	0	3	2	3	3	3	0	2	0			1	1	2	2	0	0					1.17
2	64104	08.27.2008 9:32 AM	Merlin	Appenzell Cattle Dog	2	1	3	1	0	1	2	1	3	3	2	0	1	1			0	2	1	2	1	0					0.75
1	4351	10.13.2007 8:11 AM	mexx	Appenzell Cattle Dog	2	1	2	1	0	1	2	2	3	1	3	2	2	2	2	1							0	2	1.25	1.67
1	5140	10.19.2007 7:34 PM	Nelly	Appenzell Cattle Dog	2	1	10	2	0	0	2	2	2	2	2	0	2	1	2	2							0.4	1.8	1.5	0
1	3080	09.30.2007 5:27 PM	nic	Appenzell Cattle Dog	2	1	3	1	1	1	4	2	3	2	2	0	3	0	2	2							0	2	1.5	1.67
1	11693	12.12.2007 12:52 PM	Nina	Appenzell Cattle Dog	2	1	15	2	1	0	3	2	1	2	3	0	1	0	1	2							1.8	1.4	1.75	1.67
2	66940	09.11.2008 10:43 AM	Otto	Appenzell Cattle Dog	2	1	2.75	1	1	0	4	2	3	1	2	0	2	1			0	2	2	1	1	0					0.5
1	10797	12.05.2007 6:30 PM	Paula	Appenzell Cattle Dog	2	1	0.9	2	0	0	2	2	1	2	3	0	1	1	1	1							1.4	2	1.75	2
1	6921	11.03.2007 1:54 PM	Paula	Appenzell Cattle Dog	2	1	5.5	2	1	0	2	2	3	3	2	1	1	0	2	2							1.4	1.6	1.5	1
1	7391	11.07.2007 1:33 PM	Pimpf	Appenzell Cattle Dog	2	1	6	2	0	1	4	2	3	2	2	0	2	1	2	1							0	1	2	0.67
1	2509	09.24.2007 3:09 PM	Rajata	Appenzell Cattle Dog	2	1	1.5	2	0	0	2	2	3	2	3	0	2	3	2	2							0.2	2	1.5	0.67
1	9833	11.28.2007 8:41 PM	Rex	Appenzell Cattle Dog	2	1	0.1	1	0	3	3	2	2	1	3	0	2	0	2	2							1	1.4	1.25	1.33
1	10168	12.01.2007 2:44 PM	Ricky	Appenzell Cattle Dog	2	1	0.3	2	0	3	2	2	3	1	3	0	2	0	2	2							1.2	1.8	1.75	2
1	8597	11.19.2007 1:10 PM	Rocky	Appenzell Cattle Dog	2	1	2	1	0	0	2	1	3	1	3	0	2	2	1	2							1.6	1.6	1.75	2
1	9951	11.29.2007 6:26 PM	Sam	Appenzell Cattle Dog	2	1	1	1	0	1	3	2	2	2	3	0	2	2	2	2							0.2	2	0.75	1
1	3685	10.06.2007 1:03 AM	Sammy	Appenzell Cattle Dog	2	1	7	1	1	1	2	2	3	2	3	0	1	0	1	1							0.6	1.4	1.25	1.67
1	835	09.10.2007 10:06 AM	Sunny	Appenzell Cattle Dog	2	1	4	2	1	0	3	2	2	3	3	0	1	0	1	1							1.4	1.6	1.5	0.67
1	6277	10.29.2007 10:36 AM	Umbria	Appenzell Cattle Dog	2	1	0.2	2	0	0	2	2	2	3	2	0	2	1	2	2							1.2	1.8	1.75	2
1	7535	11.08.2007 6:27 PM	Wotan	Appenzell Cattle Dog	2	1	0.3	1	0	0	2	1	4	2	2	2	1	1	2	2							0.8	1.4	1.5	1.67
1	3764	10.07.2007 9:30 AM	wotan	Appenzell Cattle Dog	2	1	0.5	1	0	1	2	2	3	1	2	0	1	2	2	2							1.6	1.6	1.5	1.33
2	66118	09.05.2008 11:56 PM	xxx	Appenzell Cattle Dog	2	1	5	1	1	0	2	2	3	1	3	0	1	2			1	2	2	2	1	1					1
2	91363	12.31.2008 7:13 AM	Amaroo	Australian Cattle Dog	1	1	0.2	1	0	0	2	2	3	1	3	0	2	1			1	1	1	2	1	0					1.5
1	584	09.05.2007 2:52 PM	Bluey	Australian Cattle Dog	1	1	2	1	0	2	2	2	2	2	1	0	2	3	2	2							1	2	1.25	2
1	10237	12.01.2007 8:58 PM	bob	Australian Cattle Dog	1	1	0.3	1	0	0	2	1	2	1	1	0	3	2	1	1							1	1.4	0.75	1
2	77294	10.29.2008 3:50 PM	Carlos	Australian Cattle Dog	1	1	3	1	1	1	4	2	2	2	1	0	2	3			0	1	2	2	0	1					0.5
2	87764	12.14.2008 9:03 AM	chicco	Australian Cattle Dog	1	1	1.2	1	0	0	3	1	3	2	3	0	1	0			0	1	1	1	0	0					1.33
1	3083	09.30.2007 5:38 PM	diego	Australian Cattle Dog	1	1	2	1	0	0	3	2	3	2	3	0	1	0	1	2							0.4	1.8	1.75	1.67
2	89284	12.19.2008 10:28 AM	Djemba	Australian Cattle Dog	1	1	1.5	2	0	0	3	2	2	2	2	0	2	3			0	1	2	1	0	1					0.25
2	66701	09.10.2008 12:27 PM	Don Speedy	Australian Cattle Dog	1	1	0.9	1	0	1	2	2	2	2	3	1	2	3			0	2	2	2	1	0					0.58
1	4383	10.13.2007 5:29 PM	emmy	Australian Cattle Dog	1	1	0.5	2	0	0	2	2	3	1	3	0	1	1	2	2							1.4	1.8	1.75	1.67
2	79968	11.11.2008 6:03 PM	Eole	Australian Cattle Dog	1	1	5	2	0	1	2	1	3	4	3	0	3	3			0	1	1	1	0	0					0.42
2	76569	10.25.2008 8:04 PM	fly	Australian Cattle Dog	1	1	1	2	0	2	3	2	3	2	3	1	1	0			1	2	2	2	0	0					0.58
1	11076	12.07.2007 5:45 PM	Gangha	Australian Cattle Dog	1	1	3	2	0	3	4	2	3	2	2	2	3	1	2	2							0.4	2	1.25	1.33
2	54140	07.10.2008 5:12 PM	joe	Australian Cattle Dog	1	1	11	1	0	3	2	2	3	2	1	1	2	3			0	2	2	1	1	0					0.17
2	61204	08.14.2008 1:07 PM	judy	Australian Cattle Dog	1	1	0.8	2	0	1	2	2	2	1	3	1	2	1			0	2	1	2	0	1					0.75
2	86070	12.06.2008 9:23 PM	Lotta	Australian Cattle Dog	1	1	1.2	2	0	3	2	1	3	2	2	0	1	1			0	1	2	2	0	1					1
1	12764	12.26.2007 8:36 PM	Rajah	Australian Cattle Dog	1	1	2	2	0	3	2	2	3	3	3	2	2	3	2	1							1.4	2	1	1.33
1	3947	10.08.2007 10:38 PM	Roké	Australian Cattle Dog	1	1	0.5	2	0	2	2	2	2	2	3	1	2	2	1	2							1.2	1.8	1.75	1
1	3044	09.30.2007 11:05 AM	Rosi	Australian Cattle Dog	1	1	0.2	2	0	0	2	2	1	2	3	0	2	1	2	2							1.6	2	1.75	2
1	11014	12.07.2007 12:51 PM	Snuppi	Australian Cattle Dog	1	1	0.6	1	0	3	3	2	3	3	3	2	1	0	2	2							1	1.4	1	1.67
1	913	09.11.2007 10:08 AM	Sophie	Australian Cattle Dog	1	1	0.8	2	1	0	2	2	3	2	2	0	1	1	2	2							2	1.6	2	2
1	2303	09.21.2007 9:26 PM	sunny	Australian Cattle Dog	1	1	2	2	1	1	4	2	2	2	2	1	2	3	2	2							0.2	2	2	0.67
2	55947	07.19.2008 8:48 PM	Amaroo	Australian Kelpie	1	1	0.7	1	0	2	2	2	2	3	3	2	2	2			0	2	2	2	0	1					1
1	8653	11.19.2007 8:36 PM	Debb	Australian Kelpie	1	1	4	2	0	2	2	2	2	2	3	0	2	0	2	2							1	1	1	1.67
2	53463	07.08.2008 9:08 AM	rufus	Australian Kelpie	1	1	4	1	1	0	3	2	3	2	2	2	2	3			0	1	2	1	0	0					0.5
2	94607	01.16.2009 12:05 PM	Smilie	Australian Kelpie	1	1	1	1	0	3	2	2	3	3	3	2	2	2			1	1	2	1	1	0					0.42
1	10601	12.04.2007 9:58 AM	Taree Kelpiebrink	Australian Kelpie	1	1	1.2	1	0	3	2	2	3	2	3	1	2	3	2	2							0.8	2	0.25	2
2	67985	09.17.2008 12:38 AM	Wilma	Australian Kelpie	1	1	1.5	2	0	3	3	2	3	3	2	1	2	3			0	2	2	1	0	1					1.25
1	10468	12.03.2007 2:41 PM	winnie	Australian Kelpie	1	1	3.5	1	0	1	2	2	3	4	2	0	2	2	2	2							1	1.8	1.75	1
2	67263	09.12.2008 4:26 PM	xxx	Australian Kelpie	1	1	1.2	2	0	1	4	2	3	4	2	2	2	3			0	1	2	1	1	0					1.08
1	4042	10.09.2007 9:16 PM		Australian Shepherd	1	1	2.5	1	0	0	2	1	3	3	3	0	3	2	2	2							1.4	2	1.25	1
1	9148	11.23.2007 11:59 PM	aaron	Australian Shepherd	1	1	1	1	0	0	2	2	3	4	1	0	2	3	2	2							0.6	1.8	0.75	1
1	770	09.08.2007 10:30 PM	Akira	Australian Shepherd	1	1	3	2	0	1	2	2	2	3	3	1	1	3	1	2							1.8	2	1.75	1
1	9653	11.27.2007 6:05 PM	Alf	Australian Shepherd	1	1	0.9	1	0	3	2	2	3	4	3	2	2	2	1	2							0.2	2	1.25	1
2	95253	01.20.2009 12:06 PM	Aukie	Australian Shepherd	1	1	0.5	2	0	3	3	2	3	1	2	0	2	1			0	1	2	2	0	0					0.33
2	53131	07.06.2008 12:29 PM	b	Australian Shepherd	1	1	3	1	1	1	2	2	3	2	3	1	1	3			0	1	1	1	0	1					0.42
1	5019	10.19.2007 12:10 AM	Barney	Australian Shepherd	1	1	3	1	0	1	3	2	3	4	1	1	1	0	2	2							2	1.8	2	1
1	2206	09.20.2007 9:09 PM	Beere	Australian Shepherd	1	1	3	1	0	3	2	1	3	2	1	1	1	3	2	2							1.4	2	1.5	2
2	53502	07.08.2008 2:44 PM	Bella	Australian Shepherd	1	1	1	2	0	2	2	2	3	2	2	0	2	3			0	1	2	1	1	0					0.58
1	9867	11.28.2007 10:51 PM	Billa	Australian Shepherd	1	1	0.3	1	0	1	2	2	3	2	3	0	1	0	2	2							1.8	2	2	2
2	66125	09.06.2008 9:40 AM	Blue sky	Australian Shepherd	1	1	2	1	0	1	4	1	3	3	3	2	1	3			0	1	2	1	1	0					0.58
1	4496	10.14.2007 6:35 PM	Bobby	Australian Shepherd	1	1	0.9	1	0	3	2	2	2	4	3	0	2	3	2	2							1.4	2	1.75	1.67
2	55005	07.15.2008 6:34 PM	Buddy	Australian Shepherd	1	1	1.8	1	0	0	2	2	2	2	3	0	1	3			0	1	2	2	1	0					0.25
2	71104	10.02.2008 1:53 PM	chipsy	Australian Shepherd	1	1	4	1	0	0	2	2	3	2	3	0	2	2			1	1	2	1	1	0					0.5
1	12840	12.27.2007 8:05 PM	Choco	Australian Shepherd	1	1	1	2	0	1	2	2	3	2	3	2	3	1	2	2							0	1.8	2	1.67
2	72534	10.08.2008 11:06 PM	Connor	Australian Shepherd	1	1	3	1	0	1	2	2	3	2	3	0	2	1			1	1	3	2	0	0					0.42
2	68918	09.21.2008 4:45 PM	Cosmo	Australian Shepherd	1	1	0.3	1	0	1	2	2	3	4	2	0	1	2			0	2	1	1	1	0					1.5
1	7664	11.10.2007 12:58 PM	Davey	Australian Shepherd	1	1	12	2	0	0	3	2	3	4	2	2	2	2	2	1							0	1.2	1	0.67
1	5017	10.18.2007 11:58 PM	Digger	Australian Shepherd	1	1	0.7	1	0	1	2	2	3	4	1	1	1	0	2	2							1	2	2	2
2	72523	10.08.2008 9:21 PM	Dublin	Australian Shepherd	1	1	2	1	0	0	2	1	3	3	3	0	3	0			0	2	2	1	1	0					0.42
2	94885	01.18.2009 12:56 AM	Dude	Australian Shepherd	1	1	9	1	0	0	4	2	2	2	3	0	2	3			0	1	2	1	1	1					0.42
1	8323	11.16.2007 8:44 PM	Elvis	Australian Shepherd	1	1	3	1	0	3	2	2	2	2	3	2	2	3	1	2							2	1.8	2	2
2	74265	10.15.2008 4:49 PM	Elly	Australian Shepherd	1	1	0.6	2	0	1	2	2	2	2	3	0	2	1			1	2	2	1	1	0					0.58
2	91908	01.03.2009 11:45 AM	Fanus	Australian Shepherd	1	1	0.4	1	0	0	3	2	2	2	2	0	2	1			0	1	2	2	0	0					0.92
1	3557	10.04.2007 10:18 PM	Fayu	Australian Shepherd	1	1	3.5	1	0	0	2	2	3	1	3	0	1	2	2	2							0.8	1.6	1.25	2
1	3141	10.01.2007 11:28 AM	Flakes	Australian Shepherd	1	1	2	1	1	2	3	2	3	4	2	0	1	2	2	2							0	2	1.5	0
1	1876	09.19.2007 1:03 PM	Frau Merkel	Australian Shepherd	1	1	2	2	0	3	2	2	3	2	2	2	3	3	1	1							0	1.6	0.5	2
1	4007	10.09.2007 4:54 PM	Frodeo	Australian Shepherd	1	1	1	1	0	0	2	1	3	1	2	2	1	2	1	2							1	2	2	1.33
2	68730	09.20.2008 11:45 AM	Fynn	Australian Shepherd	1	1	2	1	1	0	2	2	2	2	3	0	2	1			0	1	2	1	1	0					0.58
1	11342	12.09.2007 6:02 PM	gizmo	Australian Shepherd	1	1	1.8	1	1	3	2	2	3	1	3	0	2	3	1	1							1.4	1.8	1.75	1.33
1	6583	10.31.2007 3:06 PM	Glenn	Australian Shepherd	1	1	0.3	1	0		3	1	3	1	3	1	2	0	2	1							0.2	1	1.25	0
1	13415	01.03.2008 1:30 AM	Hailey may	Australian Shepherd	1	1	2	2	0	1	2	2	2	2	2	1	2	1	1	1							0	2	0.75	1
1	13331	01.02.2008 1:21 PM	Harley	Australian Shepherd	1	1	0.9	1	0	0	2	2	2	3	3	1	2	2	2	2							1.6	1.8	2	2
2	92247	01.05.2009 6:53 PM	Harry	Australian Shepherd	1	1	2.5	1	1	1	2	2	2	3	3	2	2	3			0	1	2	1	1	1					0.67
2	77015	10.28.2008 11:41 AM	hauser	Australian Shepherd	1	1	0.4	1	0	0	2	2	3	4	2	0	1	2			0	2	2	1	1	0					1.33
1	5109	10.19.2007 4:52 PM	Jacki	Australian Shepherd	1	1	8	2	0	3	2	2	3	1	2	2	2	3	2	1							0.2	1.8	0.5	1.67
2	58036	07.29.2008 4:28 PM	Jenna	Australian Shepherd	1	1	3.5	2	0	0	2	2	3	1	1	0	2	3			0	2	2	2	1	0					0.33
1	6456	10.30.2007 3:04 PM	jocy	Australian Shepherd	1	1	6	2	0	2	2	2	3	1	3	2	3	1	2	1							1.6	1.6	1.5	2
2	89448	12.19.2008 7:04 PM	Jon	Australian Shepherd	1	1	0.3	1	0	0	2	1	3	4	3	0	2	1			1	1	2	1	0	0					0.5
1	1481	09.16.2007 1:03 PM	Josy	Australian Shepherd	1	1	1.4	2	0	1	2	1	3	2	2	0	1	3	2	2							1	1.8	1.75	1.67
2	91723	01.02.2009 12:19 PM	Joy	Australian Shepherd	1	1	0.75	2	0	0	2	1	2	2	2	1	1	2			0	2	2	1	1	0					1.08
2	73625	10.13.2008 10:28 AM	joy	Australian Shepherd	1	1	6	2	1	0	2	2	2	2	3	0	2	3			0	2	3	1	1	1					0.58
1	4335	10.12.2007 9:39 PM	Kenai	Australian Shepherd	1	1	1.2	1	0	3	2	1	3	2	3	2	2	3	2	2							1	1.6	1.25	0.67
1	4729	10.16.2007 3:14 PM	Kira	Australian Shepherd	1	1	3	2	1	1	2	2	3	4	3	0	2	2	2	2							1.2	2	1.5	2
1	7218	11.05.2007 5:20 PM	Leni	Australian Shepherd	1	1	0.8	2	0	0	2	2	3	4	2	0	2	2	2	2							1	2	2	1.67
1	1314	09.14.2007 6:22 PM	Leonie	Australian Shepherd	1	1	3	2	0	0	2	2	2	3	2	2	1	1	2	2							0.8	2	2	2
1	8655	11.19.2007 8:39 PM	linus	Australian Shepherd	1	1	0.4	1	0	0	2	2	3	4	3	0	2	2	1	2							1	1.8	1.75	1.67
2	53931	07.09.2008 7:17 PM	Lucky	Australian Shepherd	1	1	5	1	1	0	2	2	3	2	2	0	2	0			0	1	2	2	1	1					0.33
1	5307	10.21.2007 4:46 PM	Lucy	Australian Shepherd	1	1	3	2	1	2	2	2	3	4	2	1	1	3	2	2							1.4	1.8	2	0.67
2	66425	09.08.2008 4:01 PM	Luk	Australian Shepherd	1	1	2	1	0	1	2	2	2	2	3	0	2	3			0	2	2	2	1	1					0.25
2	67833	09.16.2008 1:57 PM	Luke	Australian Shepherd	1	1	2.5	1	1	1	2	1	3	2	2	0	2	3			0	1	3	1	1	0					0.5
1	1840	09.19.2007 10:13 AM	mala	Australian Shepherd	1	1	0.3	2	0	2	2	1	3	1	2	0	2	0	2	2							1.4	2	1.5	0.67
1	12933	12.28.2007 9:08 PM	mara	Australian Shepherd	1	1	4	2	1	2	2	1	3	2	3	0	2	3	1	1							1.6	1.6	1.25	1.67
1	1872	09.19.2007 12:56 PM	Matjes	Australian Shepherd	1	1	7	2	0	3	1	2	3	2	2	2	3	3	2	1							1	1.8	2	2
2	60911	08.13.2008 1:51 PM	melzig	Australian Shepherd	1	1	3.5	1	0	0	2	2	3	3	2	1	3	0			0	1	2	1	1	0					0.92
1	6771	11.02.2007 12:13 AM	mensen	Australian Shepherd	1	1	0.5	1	0	1	2	2	2	4	3	0	2	2	2	2							0.8	1.4	2	2
1	9556	11.26.2007 10:15 PM	Merlin	Australian Shepherd	1	1	1.6	1	0	1	2	2	3	1	3	1	2	0	2	2							1.8	2	2	1
2	90014	12.22.2008 2:36 PM	Merlin	Australian Shepherd	1	1	1	1	0	0	2	2	3	2	1	0	2	2			0	1	2	1	1	0					0.33
2	94303	01.15.2009 4:39 PM	Merlin	Australian Shepherd	1	1	2.5	1	1	0	2	2	3	2	2	0	2	3			0	2	2	1	1	0					1.58
1	3895	10.08.2007 3:16 PM	Mickey	Australian Shepherd	1	1	5	1	1	1	2	2	3	3	2	0	1	2	2	2							1.4	2	1	1.67
1	6782	11.02.2007 8:32 AM	minka	Australian Shepherd	1	1	5	2	0	2	2	1	3	2	3	0	3	3	1	2							1.2	2	0.75	2
1	5081	10.19.2007 1:31 PM	Monty	Australian Shepherd	1	1	3.8	1	1	0	2	2	3	4	2	0	2	3	2	1							0.4	1.4	0	0.67
1	2593	09.25.2007 12:46 PM	mosis	Australian Shepherd	1	1	1	1	0	2	2	2	2	4	1	0	1	0	2	2							1.2	1.8	2	1.67
1	1882	09.19.2007 1:09 PM	Mulle	Australian Shepherd	1	1	9	2	1	3	2	2	3	2	2	2	3	2	1	1							2	0.6	1.75	2
1	12025	12.16.2007 10:26 AM	Mylo	Australian Shepherd	1	1	0.6	1	0	0	2	2	3	2	3	0	1	2	1	2							0.6	1.8	2	1
1	7652	11.10.2007 10:00 AM	Nash	Australian Shepherd	1	1	0.3	2	0	2	2	2	2	2	3	1	2	1	1	2							0.4	1.6	1.75	1.67
2	94048	01.14.2009 8:14 PM	Nele	Australian Shepherd	1	1	0.5	2	0	0	2	2	2	2	2	0	1	0			0	2	2	2	1	0					0.58
1	5249	10.20.2007 11:28 PM	Pan Tau	Australian Shepherd	1	1	0.5	1	0	2	2	2	2	2	1	2	2	1	2	2							1.4	2	2	1.33
2	66553	09.09.2008 1:38 PM	Party	Australian Shepherd	1	1	1.4	2	0	1	3	2	2	4	1	0	2	3			0	1	2	2	1	0					0.5
2	93243	01.10.2009 4:52 PM	Paula	Australian Shepherd	1	1	4.5	2	1	3	2	2	2	2	2	2	1	2			0	1	3	2	1	0					0.33
2	58523	07.31.2008 8:16 PM	Pepper	Australian Shepherd	1	1	1.2	1	1	1	2	2	2	2	3	0	2	3			0	2	3	1	1	0					0.42
1	8515	11.18.2007 6:46 PM	Piwo	Australian Shepherd	1	1	1	1	0	1	2	2	3	3	3	2	3	3	2	2							0.8	1.8	1.75	2
1	4109	10.10.2007 3:10 PM	ronja	Australian Shepherd	1	1	7	2	0	1	2	2	3	2	2	0	1	2	2	2							0.6	2	1.25	1.33
1	10098	11.30.2007 8:34 PM	Rusty	Australian Shepherd	1	1	2	1	1	3	3	2	3	4	3	0	1	2	2	2							1	2	1.75	2
1	3110	09.30.2007 9:07 PM	Sally	Australian Shepherd	1	1	5	2	0	0	2	1	4	1	3	0	1	2	2	1							1.2	1.6	0.75	1.67
2	72725	10.09.2008 5:01 PM	Scotty	Australian Shepherd	1	1	0.3	1	0	2	2	2	3	2	3	0	1	2			0	1	2	2	1	0					1
2	92059	01.04.2009 6:11 PM	Scotty	Australian Shepherd	1	1	0.7	1	0	1	2	1	2	3	1	0	1	1			0	1	3	2	1	0					0.92
2	85603	12.04.2008 5:47 PM	Sepp	Australian Shepherd	1	1	3	1	0	0	2	2	3	4	2	0	1	2			0	1	2	1	0	0					0.42
2	93511	01.12.2009 8:55 PM	Sgt. Pepper	Australian Shepherd	1	1	2	1	0	0	2	2	3	4	2	0	1	3			0	1	2	1	1	1					0.33
1	4482	10.14.2007 5:45 PM	Shadow	Australian Shepherd	1	1	0.7	2	0	1	2	2	2	2	2	1	2	2	2	2							1.6	1.8	1.5	2
1	4517	10.14.2007 8:23 PM	Shadow	Australian Shepherd	1	1	1.5	1	0	3	2	2	3	1	2	0	2	1	2	2							1.8	1.8	1.75	0.67
1	10994	12.07.2007 1:56 AM	Sheila	Australian Shepherd	1	1	1.3	2	0	1	2	2	3	4	2	0	2	3	2	2							0.6	2	2	1
1	9061	11.23.2007 10:17 AM	silke	Australian Shepherd	1	1	0.6	1	0	0	2	2	3	2	3	0	3	2	1	2							1.2	2	1.75	1
1	5080	10.19.2007 1:27 PM	Sina	Australian Shepherd	1	1	7	2	1	0	3	1	2	3	2	0	2	3	2	2							1.6	2	1	1.67
1	6310	10.29.2007 3:21 PM	Skippy	Australian Shepherd	1	1	2	2	0	1	4	1	3	4	3	0	1	2	1	2							2	1.8	1.5	2
2	81908	11.17.2008 9:21 PM	Sky	Australian Shepherd	1	1	0.75	1	0	0	2	2	2	3	2	0	3	3			0	1	2	2	1	1					0.58
2	71541	10.04.2008 7:57 PM	Spencer	Australian Shepherd	1	1	0.4	1	0	0	2	2	3	3	3	0	1	1			1	1	2	1	1	0					1.25
2	65088	09.02.2008 9:37 AM	Spike	Australian Shepherd	1	1	3	1	0	3	2	2	1	2	3	1	3	2			0	1	2	2	0	1					0.58
1	6457	10.30.2007 3:18 PM	summer	Australian Shepherd	1	1	2	2	0	2	2	2	3	1	3	2	3	1	2	1							1.2	1.8	2	1.33
1	6790	11.02.2007 9:55 AM	Sunny	Australian Shepherd	1	1	0.5	1	0	0	2	2	3	3	3	0	1	1	2	2							1.4	1.8	1.75	1.67
1	8151	11.15.2007 11:41 AM	timber	Australian Shepherd	1	1	1	1	0	2	2	2	3	4	2	1	2	3	2	2							0.2	1.8	1.5	0
1	9417	11.26.2007 9:44 AM	Timmel, Ines	Australian Shepherd	1	1	1.5	1	0	1	2	2	3	1	2	0	1	3	2	2							0.6	1.6	0.75	2
1	5186	10.20.2007 12:06 PM	Tommy	Australian Shepherd	1	1	1.2	1	0	0	2	2	3	4	2	0	1	2	1	2							1.4	2	1.75	2
1	4976	10.18.2007 8:55 PM	TomTom	Australian Shepherd	1	1	2	1	1	3	3	2	3	3	3	0	2	1	2	2							1	1.8	1.5	1
1	907	09.10.2007 10:43 PM	willi	Australian Shepherd	1	1	6	1	0	0	2	2	3	2	3	0	2	3	1	2							0.6	2	2	1.67
1	1879	09.19.2007 1:06 PM	Wurschti	Australian Shepherd	1	1	7	1	1	3	1	2	3	2	2	2	3	3	1	1							1.6	1.4	2	1.33
2	62184	08.18.2008 5:17 PM	Yaris	Australian Shepherd	1	1	4	1	1	1	3	2	2	2	2	1	2	3			0	2	2	1	1	1					0.83
2	67371	09.13.2008 12:35 PM	Bijou	Australian Silky Terrier	3	1	3	1	0	1	3	1	3	1	2	0	3	1			0	1	3	1	0	1					0.33
2	68075	09.17.2008 11:08 AM	eros	Australian Silky Terrier	3	1	1	1	0	1	3	2	3	1	3	0	1	1			0	1	2	1	1	0					1.17
2	54949	07.15.2008 2:09 PM	All About Lucy	Australian Terrier	3	1	6	2	1	0	2	2	3	3	1	0	2	3			0	1	2	1	1	1					0.5
2	66565	09.09.2008 3:12 PM	Anke S?tterlin	Australian Terrier	3	1	2	2	0	1	1	2	3	1	3	1	2	3			1	2	2	1	0	1					0.92
2	66534	09.09.2008 12:11 PM	Anke S?tterlin	Australian Terrier	3	1	6	2	0	0	2	2	3	1	3	1	2	3			1	2	2	1	0	1					0.25
2	92257	01.05.2009 8:13 PM	cessy	Australian Terrier	3	1	12	2	1	0	2	2	2	4	3	0	1	2			0	1	2	1	0	0					0.58
2	57032	07.23.2008 8:42 PM	Djipsy	Australian Terrier	3	1	5	2	1	0	2	2	1	2	2	0	2	3			0	1	3	2	1	1					0.08
2	53341	07.07.2008 8:40 PM	don	Australian Terrier	3	1	3	1	0	3	3	2	3	2	3	1	3	0			1	1	2	1	0	0					0.25
3	5282	10.21.2007 12:50 PM	Ivanhoe	Australian Terrier	3	1	3	1	1	3	2	2	3	1	2	1	1	0	2	2	0	1	2	1	1	1	0.4	1.8	0.75	2	1.25
2	65332	09.03.2008 1:16 PM	IXI	Australian Terrier	3	1	0.5	2	0	0	2	2	3	3	3	0	2	2			0	1	2	1	1	0					1.25
1	97	08.29.2007 1:22 PM	Jack	Australian Terrier	3	1	3	1	0	1	2	2	1	1	3	1	2	0	2	1							0.6	1.2	1	1.33
1	3615	10.05.2007 2:07 PM	Kiara	Australian Terrier	3	1	2.5	2	0	0	4	2	3	1	2	1	2	0	2	2							1	1.8	1.5	1.67
2	65544	09.03.2008 9:09 PM	Lu	Australian Terrier	3	1	1	1	0	1	2	2	3	4	2	2	2	0			0	1	2	1	1	0					0.17
1	7915	11.12.2007 5:53 PM	Nikki	Australian Terrier	3	1	0.7	2	0	3	3	2	3	2	3	0	1	1	1	2							1.4	1.8	1.75	1.67
2	57432	07.25.2008 2:46 PM	Samy	Australian Terrier	3	1	2.5	1	1	0	2	2	1	2	3	0	1	2			0	1	3	2	1	0					0.67
1	8512	11.18.2007 6:30 PM	Victor	Australian Terrier	3	1	0.3	1	0	0	3	2	2	3	3	1	2	2	2	2							1.6	2	1.25	1.33
1	5092	10.19.2007 2:18 PM	Aika	Austrian Black and Tan Hound	6	1	2	2	0	3	2	1	4	3	3	0	3	1	2	1							0	1	1.5	0.33
2	53702	07.08.2008 9:57 PM	Aisha	Austrian Black and Tan Hound	6	1	1.3	2	0	0	2	2	3	4	2	0	2	1			0	1	2	2	0	1					0.58
1	3559	10.04.2007 10:41 PM	tiko	Austrian Black and Tan Hound	6	1	3	1	0	1	3	2	3	2	3	1	2	1	2	1							0.4	2	2	1.67
1	4037	10.09.2007 8:37 PM	Elli	Austrian Pinscher	2	1	5	2	1	0	4	2	1	1	3	0	1	0	1	2							1.2	0.8	0.5	1.33
2	75145	10.18.2008 3:27 PM	gracy	Austrian Pinscher	2	1	8	2	1	2	2	2	3	3	2	2	2	2			0	1	2	1	0	0					0.67
2	87547	12.12.2008 6:35 PM	Kira	Austrian Pinscher	2	1	6	2	0	1	2	2	1	1	3	0	2	1			0	1	1	1	1	0					0.67
1	7635	11.09.2007 6:54 PM	Rudi	Austrian Pinscher	2	1	7	1	1	0	2	2	2	2	1	1	3	2	1	2							1.6	1.8	1.25	2
2	57044	07.23.2008 10:20 PM	Samira	Austrian Pinscher	2	1	1.3	2	1	2	3	2	2	1	1	0	2	0			0	1	3	2	0	1					1
2	95168	01.19.2009 4:29 PM	Stella	Austrian Pinscher	2	1	9	2	1	0	3	2	3	3	2	0	1	3			0	3	2	1	1	1					1
2	54172	07.10.2008 7:53 PM	Rebhaja	Azawakh	10	1	3	1	1	1	2	2	3	4	3	0	1	3			0	1	2	1	1	0					0.42
2	84783	12.01.2008 5:02 PM	Wayaasi	Azawakh	10	1	0.4	1	0	1	2	2	3	4	2	0	1	1			0	1	2	1	1	0					0.42
1	3723	10.06.2007 7:31 PM	alfred	Bandog	-	1	11	1	1	0	3	2	3	2	2	0	2	0	1	1							1.6	1.6	0.75	2
1	4271	10.12.2007 9:03 AM	Mara	Bandog	-	1	10	2	0	3	3	1	3	1	2	1	3	1	2	2							0.8	1.4	0	1.67
1	11959	12.15.2007 10:14 AM	Basenji	Basenji	5	1	0.2	2	0	0	2	2	3	2	3	0	1	0	1	2							1.8	2	1.75	1.67
1	1854	09.19.2007 11:35 AM	Bello	Basenji	5	1	2	1	1	1	2	2	2	4	2	0	1	0	2	2							0.2	0.8	0.75	1
2	57990	07.29.2008 10:58 AM	Billy	Basenji	5	1	12	1	1	1	2	2	3	2	1	0	1	1			0	1	2	1	0	1					0.75
2	86692	12.10.2008 1:26 PM	Jupp	Basenji	5	1	12	1	0	1	3	2	3	2	2	1	1	0			0	1	1	2	1	1					0.92
1	3868	10.08.2007 12:33 PM	Ken	Basenji	5	1	5	1	1	0	4	2	3	4	2	1	1	0	2	1							0.2	0.6	1.75	0
2	80843	11.14.2008 3:34 PM	nico	Basenji	5	1	2	1	0	0	3	2	1	2	3	0	2	0			1	2	2	2	1	0					0.58
1	3061	09.30.2007 2:47 PM	Pablo	Basenji	5	1	5	1	0	2	2	2	3	3	3	2	2	1	2	1							1.6	0.8	1.25	0.33
2	82545	11.20.2008 5:23 PM	Matteo	Basque Shepherd Dog	-	1	4	1	1	0	4	2	3	3	3	0	1	0			1	1	2	1	0	0					0.67
3	3677	10.05.2007 10:59 PM	Sunny	Basque Shepherd Dog	-	1	2	2	1	1	4	2	2	4	2	0	1	0	1	2	0	1	2	1	1	0	0.2	1.6	1.75	0.67	0.33
1	11863	12.13.2007 8:20 PM	Ella	Basset Fauve de Bretagne	6	1	2	2	1	3	4	2	3	2	3	2	2	1	2	2							1.4	2	1	1.33
2	69529	09.24.2008 6:02 PM	Willy	Basset Fauve de Bretagne	6	1	8	1	0	1	4	1	3	3	3	0	1	0			0	1	1	1	0	0					0.92
2	63684	08.25.2008 8:14 PM	Albert	Basset Hound	6	1	7	1	0	0	2	2	3	1	2	0	1	0			0	1	2	1	1	0					1.33
1	10629	12.04.2007 2:19 PM	barnie	Basset Hound	6	1	0.5	1	0	0	3	1	3	2	3	0	1	2	2	2							1.8	1.4	2	2
1	5212	10.20.2007 5:17 PM	Cleo	Basset Hound	6	1	8	2	1	1	2	2	3	2	3	0	2	0	2	1							2	0.8	2	0.67
2	57736	07.27.2008 3:42 PM	Einstein	Basset Hound	6	1	4.5	1	0	3	2	2	3	2	2	1	1	3			0	2	2	1	0	0					0.25
1	11276	12.09.2007 8:54 AM	G.Hosemann	Basset Hound	6	1	7	2	1	3	2	1	4	4	1	0	3	0	2	2							1.4	1.4	1.5	2
2	53116	07.06.2008 11:26 AM	Leeloo	Basset Hound	6	1	0.5	2	0	0	2	1	2	3	2	0	2	2			0	1	1	1	0	0					0.83
1	4333	10.12.2007 9:38 PM	paco	Basset Hound	6	1	0.5	1	0	0	2	1	3	2	3	1	3	1	2	2							0.8	1.4	2	2
1	2732	09.26.2007 5:07 PM	Pauline	Basset Hound	6	1	2	2	0	1	4	2	2	3	1	0	1	1	2	2							2	1.2	2	2
2	61129	08.14.2008 9:22 AM	popp	Basset Hound	6	1	1.1	2	1	1	2	2	3	2	2	0	1	1			0	1	3	1	0	1					1.25
1	12636	12.24.2007 5:28 PM	Rusina	Basset Hound	6	1	3	2	0	3	3	2	3	2	2	2	2	3	2	2							1.6	1.8	2	2
1	1874	09.19.2007 12:59 PM	Socke	Basset Hound	6	1	13	1	1	3	3	2	4	4	1	2	1	3	2	2							2	1.8	1.75	2
2	64114	08.27.2008 11:11 AM	Taggy	Basset Hound	6	1	5	2	0	0	2	2	3	2	2	0	1	0			0	2	2	2	1	0					0.75
1	8995	11.22.2007 6:05 PM	Wanda	Basset Hound	6	1	0.5	2	0	0	2	2	3	3	3	0	1	2	2	2							1.8	1.4	1.75	2
2	75322	10.19.2008 7:21 PM		Bavarian Mountain Scent Hound	6	1	0.75	1	0	0	2	2	3	4	3	0	2	1			0	2	2	2	1	0					0.83
1	9650	11.27.2007 5:59 PM	Artos	Bavarian Mountain Scent Hound	6	1	6	1	0	0	2	2	3	2	3	0	2	3	1	1							1.4	1.8	1.25	2
1	8337	11.16.2007 10:03 PM	asko	Bavarian Mountain Scent Hound	6	1	2.5	1	0	0	2	1	3	3	3	0	3	0	1	2							1	1.4	0.25	2
1	1783	09.18.2007 9:16 PM	Benny	Bavarian Mountain Scent Hound	6	1	2.5	1	0	3	2	1	3	1	3	0	1	2	2	2							2	1.8	2	1.67
2	64113	08.27.2008 10:55 AM	buddy	Bavarian Mountain Scent Hound	6	1	0.75	1	1	1	3	2	3	3	3	0	1	0			0	1	3	2	0	1					0.42
2	61623	08.15.2008 12:08 PM	Dalf	Bavarian Mountain Scent Hound	6	1	3	1	0	1	2	2	3	4	3	0	3	2			1	1	2	1	1	0					0.67
1	13716	01.05.2008 10:18 PM	Enzo	Bavarian Mountain Scent Hound	6	1	9	1	0	0	2	2	2	3	3	0	2	2	2	2							1.6	1.4	0.75	1.67
2	93883	01.14.2009 2:00 PM	F. v. Schwarzenbruch	Bavarian Mountain Scent Hound	6	1	3	2	1	1	2	2	3	2	2	0	1	2			0	1	2	1	0	0					0.5
1	9827	11.28.2007 8:10 PM	Fatima	Bavarian Mountain Scent Hound	6	1	3	2	1	0	2	2	1	1	3	0	2	3	2	2							0.2	2	1.25	1
1	1782	09.18.2007 9:14 PM	Franz?l	Bavarian Mountain Scent Hound	6	1	3	1	0	3	2	2	3	4	2	2	2	1	2	2							2	2	1.75	1.67
1	3720	10.06.2007 6:55 PM	Franzi	Bavarian Mountain Scent Hound	6	1	2	2	1	0	2	1	3	1	3	0	2	3	1	2							1.2	1.8	1.5	0.33
1	3055	09.30.2007 1:32 PM	Harry	Bavarian Mountain Scent Hound	6	1	3	1	0	0	2	2	1	1	3	0	2	2	2	2							1	1.4	2	1.33
1	8676	11.20.2007 1:27 AM	jack	Bavarian Mountain Scent Hound	6	1	0.2	1	0	1	2	1	3	1	3	1	2	0	2	2							1.2	1.8	1.25	1.33
2	93570	01.13.2009 11:33 AM	Jackl	Bavarian Mountain Scent Hound	6	1	3	1	1	0	2	1	3	1	2	0	1	3			0	1	2	1	0	0					0.08
1	4288	10.12.2007 2:21 PM	leni	Bavarian Mountain Scent Hound	6	1	0.3	2	0	1	2	2	3	2	3	0	2	1	2	2							2	1.4	1.75	1
1	13971	01.08.2008 10:21 AM	Pino	Bavarian Mountain Scent Hound	6	1	3	1	1	1	3	2	3	1	3	1	2	3	2	2							0	1.2	0.75	1.67
1	11416	12.10.2007 10:28 AM	Rike	Bavarian Mountain Scent Hound	6	1	1.5	2	0	2	2	1	3	1	3	1	2	3	2	2							1.4	1.2	1.75	2
2	92037	01.04.2009 4:24 PM	Rocco	Bavarian Mountain Scent Hound	6	1	3	1	1	2	3	2	2	1	3	0	3	3			0	1	2	1	1	0					0.33
1	7517	11.08.2007 4:11 PM	Schroeder	Bavarian Mountain Scent Hound	6	1	5	1	0	2	2	2	3	2	3	1	2	0	1	1							1.6	1.2	2	1.33
1	12658	12.25.2007 1:30 PM	Timi	Bavarian Mountain Scent Hound	6	1	6	1	1	0	4	2	3	1	3	0	1	0	1	2							0.6	1.8	0.75	1.67
2	75050	10.17.2008 9:10 PM	wanzel	Bavarian Mountain Scent Hound	6	1	6	2	1	2	1	2	3	2	3	2	2	3			1	1	3	2	1	0					0.58
1	10739	12.05.2007 8:55 AM	Aaron	Beagle	6	1	0.3	1	0	0	3	1	2	1	2	0	2	0	2	2							1.4	1.4	1	2
1	1085	09.12.2007 2:40 PM	aika	Beagle	6	1	0.6	2	0	1	2	2	3	4	3	1	2	2	2	2							0.6	2	1.75	2
1	6356	10.29.2007 9:22 PM	alina	Beagle	6	1	3	2	0	0	4	2	2	3	3	0	2	0	2	2							0.4	0.6	2	0
2	75665	10.21.2008 12:05 PM	Amy	Beagle	6	1	1.3	2	1	0	2	2	3	1	3	0	1	1			1	1	2	1	1	0					1.17
1	5963	10.26.2007 12:44 PM	Anton	Beagle	6	1	0.5	1	0	2	2	2	2	3	2	0	1	0	2	2							1	1.6	2	1.67
1	6147	10.28.2007 6:50 AM	anton	Beagle	6	1	0.5	1	0	0	2	1	3	2	2	0	2	2	1	2							1.4	1.6	1.5	2
1	10619	12.04.2007 12:47 PM	balou	Beagle	6	1	1.5	1	0	2	2	2	3	1	2	2	1	2	2	2							1.4	1.8	1.75	2
1	5836	10.25.2007 3:13 PM	balu	Beagle	6	1	0.5	1	0	0	2	2	3	3	3	0	1	0	2	2							1	1.6	1.75	2
1	5102	10.19.2007 3:23 PM	Bayley	Beagle	6	1	3.5	2	1	1	2	2	2	2	1	0	1	1	2	1							0.2	0.6	1.5	0
2	54446	07.11.2008 8:27 PM	Beat	Beagle	6	1	1.9	1	0	0	2	2	2	2	2	0	2	2			0	2	2	2	1	1					1
2	70177	09.28.2008 1:55 PM	Bella	Beagle	6	1	2	2	0	1	2	2	3	2	2	1	1	3			0	1	2	2	1	0					1.17
1	7833	11.11.2007 6:45 PM	ben	Beagle	6	1	2	1	1	0	2	1	3	1	3	0	1	1	2	2							0.2	1	0.25	2
1	8847	11.21.2007 1:55 PM	benny	Beagle	6	1	0.5	1	0	1	2	1	3	1	2	0	1	1	2	2							1.4	1	2	2
1	13896	01.07.2008 6:05 PM	Bobby	Beagle	6	1	1.2	1	0	3	2	1	3	2	2	0	2	0	1	1							1.4	1.4	1.75	2
1	11952	12.14.2007 11:55 PM	Bobby	Beagle	6	1	2	1	0	0	4	1	2	2	2	0	1	0	2	2							1.4	1.2	2	1.67
1	6005	10.26.2007 5:19 PM	bonny	Beagle	6	1	1.6	2	0	0	2	2	3	4	2	2	1	0	2	2							1	1.8	2	2
2	53150	07.06.2008 2:58 PM	Bosco	Beagle	6	1	3	1	1	0	2	1	3	4	2	0	2	3			0	2	2	1	1	0					0.75
2	61946	08.16.2008 6:24 PM	Brinja	Beagle	6	1	3	2	1	0	2	2	3	1	3	0	2	2			1	1	2	1	0	0					0.33
1	5931	10.26.2007 9:56 AM	Bryan	Beagle	6	1	3	1	0	3	2	2	3	2	2	1	2	3	2	2							2	2	2	1.67
1	11605	12.11.2007 6:38 PM	Caruso	Beagle	6	1	0.5	1	0	1	2	1	3	3	2	0	2	0	2	2							1.2	1.6	2	2
2	64783	08.31.2008 7:58 AM	cedric	Beagle	6	1	1.5	1	0	3	1	1	3	2	2	2	2	0			0	3	1	2	1	0					0.92
1	7817	11.11.2007 5:28 PM	Charly	Beagle	6	1	0.6	1	0	0	2	2	3	1	2	0	1	2	2	2							0.6	1.6	1.75	2
1	8022	11.13.2007 7:15 PM	Choupett	Beagle	6	1	0.4	2	0	0	3	2	2	3	2	0	2	0	2	2							1.2	2	2	1.67
1	8197	11.15.2007 6:45 PM	cindy	Beagle	6	1	3.5	2	1	0	2	1	3	1	3	0	1	3	2	2							1.8	2	1.75	0.67
2	62987	08.21.2008 9:48 PM	comtesse	Beagle	6	1	0.4	2	0	2	2	2	3	1	3	1	1	2			0	2	3	2	1	0					0.67
1	12813	12.27.2007 5:05 PM	Conrad	Beagle	6	1	0.6	1	0	0	3	1	2	1	3	0	2	2	1	2							1.4	2	1.75	2
1	5669	10.24.2007 3:21 PM	daysi	Beagle	6	1	0.9	2	0	2	2	1	4	1	2	0	1	1	2	2							1.6	1.4	2	1.67
1	9202	11.24.2007 6:10 PM	Diego	Beagle	6	1	0.2	1	0	0	2	2	2	2	3	0	1	1	2	2							2	1.2	1.75	1.67
2	91963	01.04.2009 2:31 AM	dog	Beagle	6	1	0.6	2	0	1	2	2	2	4	2	0	1	1			0	1	2	2	1	1					1
1	3953	10.09.2007 12:07 AM	elmo	Beagle	6	1	0.8	1	0	2	2	2	3	2	2	0	1	2	2	2							1.2	1.4	1.5	2
2	72052	10.07.2008 3:36 PM	Emely	Beagle	6	1	0.7	2	0	1	2	2	3	2	3	0	2	2			0	1	3	2	1	1					0.75
2	55625	07.17.2008 9:02 PM	Emil	Beagle	6	1	1	1	0	0	2	1	3	3	3	1	2	3			1	2	2	1	1	0					0.83
1	5487	10.23.2007 7:10 AM	Emily	Beagle	6	1	3	2	1	0	2	1	2	3	3	0	1	0	2	2							0.8	1.8	1.5	1.67
1	110	08.29.2007 2:43 PM	Emma	Beagle	6	1	3	2	1	0	2	1	2	3	2	0	1	3	2	2							0.6	1.6	1	0.67
1	5728	10.24.2007 8:42 PM	Felix	Beagle	6	1	3	1	0	0	2	2	3	2	1	0	2	3	2	1							1.6	1.4	1.25	0.67
2	93725	01.13.2009 6:33 PM	Fr?i	Beagle	6	1	3	2	1	0	4	2	3	2	2	0	1	3			0	1	2	1	1	1					0.83
1	2577	09.25.2007 10:56 AM	Frida	Beagle	6	1	0.3	2	0	1	2	2	3	1	2	0	1	1	2	2							2	2	2	2
1	8913	11.21.2007 9:25 PM	Fry	Beagle	6	1	1.3	1	0	0	4	2	2	2	2	0	2	1	2	2							0.2	1.8	1.5	0.67
2	63903	08.26.2008 5:48 PM	Gamble	Beagle	6	1	3	1	1	0	2	1	3	2	2	0	1	3			0	1	2	1	1	0					0.92
1	9039	11.22.2007 10:25 PM	Glimmer	Beagle	6	1	2	2	1	0	2	2	2	4	2	0	2	3	2	2							0.8	2	1.75	1.33
2	73423	10.12.2008 10:11 AM	Hannah	Beagle	6	1	0.4	2	0	0	2	2	1	1	3	0	2	0			0	1	2	1	1	0					0.67
2	56161	07.21.2008 3:20 PM	Henry	Beagle	6	1	4	1	0	0	2	2	3	2	1	0	3	3			0	1	3	1	1	0					0.83
1	5117	10.19.2007 5:21 PM	Herr Lehmann	Beagle	6	1	1.2	1	0	0	2	2	4	2	3	2	2	3	2	2							2	1.6	1.75	1.33
1	9608	11.27.2007 1:51 PM	higgens	Beagle	6	1	3	1	1	0	2	1	3	1	3	2	1	1	2	2							1.2	1.4	1.5	1.33
2	73343	10.11.2008 6:53 PM	Joey	Beagle	6	1	3	1	1	1	4	2	2	2	2	0	1	0			0	1	3	2	1	1					1.5
1	1414	09.15.2007 4:18 PM	Jona	Beagle	6	1	3	2	1	0	2	2	2	2	2	1	2	3	2	2							0.8	1.6	1.5	2
2	82625	11.20.2008 9:17 PM	jule	Beagle	6	1	2	2	0	2	3	2	3	2	3	0	2	0			1	1	1	2	1	1					1.42
1	11551	12.11.2007 11:36 AM	Kalli	Beagle	6	1	6	1	1	0	4	2	2	3	2	0	1	2	2	1							1.4	1.6	1.75	1.67
2	93963	01.14.2009 3:30 PM	keira	Beagle	6	1	3.5	2	1	0	2	1	2	2	2	0	1	1			0	1	2	1	1	1					0.83
2	70884	10.01.2008 2:15 PM	Kimo	Beagle	6	1	7	1	0	0	2	2	3	2	2	0	1	2			0	1	2	1	1	1					1.17
1	7516	11.08.2007 4:06 PM	kira	Beagle	6	1	0.3	2	0	0	2	2	3	2	1	0	1	1	1	1							0.6	1.4	1.75	2
2	68664	09.19.2008 4:11 PM	Laila	Beagle	6	1	2	2	1	0	2	2	3	3	3	0	1	3			0	2	2	1	1	0					1.08
2	58343	07.31.2008 9:24 AM	Lena	Beagle	6	1	1.3	2	0	0	2	2	2	3	2	0	2	1			0	1	2	1	1	1					1.08
2	85463	12.04.2008 11:44 AM	Leo	Beagle	6	1	8	1	1	0	4	2	3	1	2	0	1	0			0	1	1	1	0	0					0.92
2	70165	09.28.2008 9:47 AM	lilie	Beagle	6	1	0.2	2	0	0	2	2	2	2	3	0	2	0			1	1	3	2	0	0					1.42
1	109	08.29.2007 2:33 PM	Lina Doster	Beagle	6	1	3	2	1	0	2	2	2	3	2	0	2	3	2	1							1.2	1.8	1.5	1
1	5816	10.25.2007 12:26 PM	Lola	Beagle	6	1	1.3	2	0	0	2	2	2	2	2	0	2	2	1	2							1	1.4	2	1.67
1	6364	10.29.2007 11:00 PM	lotta	Beagle	6	1	4	2	1	0	4	2	3	1	3	0	1	0	2	2							0.4	1.2	1.5	2
1	11064	12.07.2007 4:19 PM	lucky	Beagle	6	1	7	1	1	0	2	1	3	1	3	0	2	1	1	1							1.8	2	1.5	2
2	79569	11.10.2008 11:11 AM	lucky	Beagle	6	1	4	1	0	1	2	2	2	3	2	1	1	1			0	2	2	2	1	0					0.58
2	94163	01.15.2009 10:59 AM	Lucky	Beagle	6	1	4	1	0	0	4	2	2	2	2	0	1	2			0	1	2	1	1	1					1.08
1	8787	11.20.2007 8:43 PM	lucy	Beagle	6	1	0.3	2	0	0	2	1	2	3	3	0	1	0	1	2							1.6	1.4	1	2
1	2611	09.25.2007 3:27 PM	LUG	Beagle	6	1	2	1	0	0	2	2	3	3	2	0	1	1	2	2							1.6	2	2	2
1	5942	10.26.2007 11:04 AM	Luna	Beagle	6	1	0.9	2	0	0	2	2	3	3	3	0	1	2	1	1							1.2	1.4	1.5	2
2	61023	08.13.2008 5:11 PM	Maya	Beagle	6	1	6	2	0	3	4	2	3	4	3	0	2	0			0	2	2	2	1	0					0.5
1	6984	11.03.2007 7:14 PM	Mex	Beagle	6	1	1	1	0	0	2	2	3	4	3	1	3	3	1	2							1	2	1.75	1.67
1	13742	01.06.2008 8:11 AM	Mica	Beagle	6	1	0.5	1	0	2	2	2	3	2	2	0	1	1	2	2							1.4	1.8	1.75	2
1	5645	10.24.2007 11:26 AM	Minou	Beagle	6	1	5	2	0	3	2	2	3	3	3	0	2	1	2	2							1	2	1.75	1
2	62583	08.20.2008 1:56 PM	Murphy	Beagle	6	1	0.3	1	0	0	2	2	2	2	2	0	2	1			0	1	2	1	1	0					0.92
1	8226	11.15.2007 10:12 PM	Nala	Beagle	6	1	1	2	0	2	3	2	2	2	2	1	2	1	2	2							2	1.4	1.75	1.33
2	78074	11.01.2008 10:58 PM	Nelson	Beagle	6	1	1.4	1	0	0	2	2	3	4	1	0	2	0			0	1	2	1	0	1					1.5
2	75644	10.21.2008 9:14 AM	Oscar	Beagle	6	1	6	1	0	3	3	2	4	3	2	0	1	2			0	2	2	2	1	1					0.33
1	6067	10.27.2007 10:30 AM	Oskar	Beagle	6	1	0.8	1	0	1	2	2	1	3	1	0	1	1	2	1							1.2	1.8	1.75	1.67
1	5788	10.25.2007 9:51 AM	Paul	Beagle	6	1	2	1	0	0	2	2	2	2	2	0	2	0	1	2							0.6	2	1.75	2
2	92944	01.08.2009 10:22 PM	paul	Beagle	6	1	2	1	0	0	2	2	3	3	2	0	1	0			0	1	2	2	1	1					0.83
1	5770	10.25.2007 7:08 AM	Pebbles	Beagle	6	1	3	2	1	2	2	2	3	2	2	0	1	3	2	1							2	0.8	1	1
1	2591	09.25.2007 12:31 PM	peddy	Beagle	6	1	0.5	2	0	2	2	2	3	4	3	2	3	0	1	2							1.2	1.6	1.5	2
2	77303	10.29.2008 4:23 PM	Pretty	Beagle	6	1	5	2	1	3	2	2	1	2	3	1	2	2			1	2	1	1	1	0					1
2	60565	08.11.2008 2:38 PM	Queeny	Beagle	6	1	4	2	0	0	2	2	2	4	2	0	2	3			0	1	2	1	1	0					0.83
1	5137	10.19.2007 7:19 PM	ronni	Beagle	6	1	0.5	1	0	1	2	1	3	3	3	0	1	1	2	2							2	1.8	2	1.67
1	1485	09.16.2007 1:58 PM	Rüdi	Beagle	6	1	2.5	1	0	0	2	1	2	2	2	0	1	1	1	2							1.6	1.8	1.75	2
2	75723	10.21.2008 3:05 PM	Sam	Beagle	6	1	4	1	0	3	2	2	3	1	2	1	1	2			0	2	3	2	1	1					0.75
1	5753	10.24.2007 11:27 PM	Sammy	Beagle	6	1	4	1	1	0	4	2	3	3	3	2	2	0	2	2							1	1.8	1.75	1.33
2	61990	08.17.2008 10:23 AM	Sammy	Beagle	6	1	0.25	1	0	0	2	2	1	2	3	0	1	0			1	1	2	2	1	0					1.17
1	6173	10.28.2007 10:58 AM	Sancho	Beagle	6	1	1.5	1	1	0	3	1	2	2	3	0	2	2	2	2							0.8	1.6	1.75	2
1	9848	11.28.2007 9:06 PM	Schmidt	Beagle	6	1	0.9	1	0	0	2	1	3	1	2	0	1	3	1	1							1	1.8	1.5	1.67
2	70097	09.27.2008 7:27 PM	Shira	Beagle	6	1	1.5	2	1	0	2	2	3	2	3	0	1	1			0	1	2	1	1	1					1.17
1	11835	12.13.2007 2:39 PM	Sita	Beagle	6	1	0.5	2	0	0	2	2	1	3	3	0	1	0	2	2							1.4	2	2	2
1	1056	09.12.2007 11:30 AM	Snoopy	Beagle	6	1	4	1	1	1	2	2	2	3	3	0	1	3	2	2							1.4	1.8	0.75	2
2	66470	09.08.2008 9:24 PM	Snoopy	Beagle	6	1	3	1	1	3	3	2	3	2	2	1	1	0			0	1	2	1	1	1					1.67
1	11423	12.10.2007 11:04 AM	Spanky	Beagle	6	1	2.5	1	1	0	4	1	2	2	2	0	3	1	1	1							1.4	1.8	1.75	1.67
2	84464	11.28.2008 8:54 PM	stinki	Beagle	6	1	0.8	2	0	0	3	2	2	3	2	0	2	1			0	1	3	1	1	1					0.75
1	5412	10.22.2007 2:41 PM	Timmy	Beagle	6	1	7	1	1	3	4	1	3	3	3	1	2	3	2	2							1.8	1	2	0.33
1	5973	10.26.2007 2:03 PM	Timo van het Olieland	Beagle	6	1	3	1	0	0	2	2	3	3	2	0	2	2	1	2							1.2	2	1.25	2
1	7653	11.10.2007 10:01 AM	Tina	Beagle	6	1	5	2	0	0	3	1	4	3	2	0	1	1	2	2							0.4	0	0.25	1
2	61745	08.15.2008 2:23 PM	Tommy	Beagle	6	1	13	1	1	0	3	2	2	1	2	0	1	0			0	1	2	1	1	1					0.75
1	5766	10.25.2007 1:05 AM	Willi	Beagle	6	1	2.8	1	0	1	3	2	3	2	2	0	2	1	2	2							1.2	0.6	2	2
1	8522	11.18.2007 7:46 PM	Alex	Bearded Collie	1	1	2.5	1	0	0	2	2	3	1	2	0	1	0	1	2							0.6	1.4	1.25	1.33
2	94045	01.14.2009 7:20 PM	Alina Sunpoint Dancing Queen	Bearded Collie	1	1	12	2	1	2	2	2	3	2	2	0	2	0			0	1	2	2	1	1					0.42
1	5358	10.21.2007 10:40 PM	amanda	Bearded Collie	1	1	0.7	2	0	1	2	2	3	2	3	0	2	2	2	2							1.4	1	2	2
2	77480	10.30.2008 2:04 PM	Anton	Bearded Collie	1	1	8	1	0	2	2	1	3	2	2	0	1	1			0	1	2	1	1	0					0.5
1	13209	12.31.2007 5:46 PM	ava	Bearded Collie	1	1	0.4	2	0	1	2	2	3	1	3	0	2	2	2	2							1.8	1.8	1.75	0.67
1	8068	11.14.2007 3:32 PM	balou	Bearded Collie	1	1	4	1	1	2	2	2	3	3	3	0	2	3	1	2							1	1.8	1.5	1.33
1	9551	11.26.2007 9:48 PM	balou	Bearded Collie	1	1	9	1	0	0	4	2	2	2	3	0	1	2	2	2							1	1.6	1	1.33
1	12149	12.17.2007 5:15 PM	Bogey	Bearded Collie	1	1	12	1	0	0	3	2	3	1	3	1	1	0	2	2							0.6	1.8	1.5	1.33
1	9135	11.23.2007 10:28 PM	Buddy	Bearded Collie	1	1	8	1	1	0	2	2	3	1	3	0	1	0	1	2							0.6	1.2	2	2
1	3950	10.08.2007 10:59 PM	Butch	Bearded Collie	1	1	1.4	1	1	3	3	1	3	3	3	0	1	0	1	1							0.4	0.6	1.75	1.33
2	74413	10.16.2008 8:44 AM	Butch	Bearded Collie	1	1	3	1	1	3	4	1	3	2	2	1	1	1			0	1	2	1	0	0					1.25
1	6476	10.30.2007 5:23 PM	ceddi	Bearded Collie	1	1	11	1	0	0	2	2	3	2	3	1	2	1	1	1							1.4	1	1.5	2
2	73751	10.13.2008 10:19 PM	chiara	Bearded Collie	1	1	2.5	2	0	0	2	2	2	4	2	0	2	3			0	1	2	1	0	1					0.75
2	86385	12.08.2008 9:18 PM	Cora	Bearded Collie	1	1	6	2	1	2	2	2	3	2	2	1	1	3			0	1	2	1	1	1					0.75
1	8799	11.20.2007 9:49 PM	Corin	Bearded Collie	1	1	5	2	1	2	2	2	3	2	2	1	1	3	2	2							1	2	1.75	1.33
2	53115	07.06.2008 11:26 AM	Debbie	Bearded Collie	1	1	8.5	2	1	0	3	2	3	2	2	0	1	3			0	1	2	1	1	1					0.25
1	13161	12.31.2007 12:52 AM	dijou	Bearded Collie	1	1	4	2	1	1	2	2	3	1	3	1	2	2	1	1							1.2	1.4	1.75	2
1	640	09.06.2007 5:29 PM	Dinky	Bearded Collie	1	1	9	2	0	0	2	2	2	2	3	0	2	0	1	2							1.6	1.4	1.5	1.67
2	93147	01.09.2009 8:11 PM	Dougal	Bearded Collie	1	1	3	1	0	1	2	2	3	2	2	0	1	1			0	1	2	1	1	1					1.08
1	13073	12.30.2007 12:33 PM	dustin	Bearded Collie	1	1	1.8	1	1	1	4	2	3	1	3	2	1	2	2	2							2	1	2	1.33
2	66839	09.10.2008 9:30 PM	elmo	Bearded Collie	1	1	1.7	1	0	2	2	2	3	1	3	0	1	2			1	1	2	1	0	0					0.83
1	3609	10.05.2007 1:23 PM	Elton	Bearded Collie	1	1	4.5	1	0	0	2	2	3	1	2	2	1	2	2	2							1.8	1	1.75	1
1	524	09.04.2007 1:24 PM	Emma	Bearded Collie	1	1	1.3	2	0	1	2	1	3	3	3	0	2	2	2	2							1.6	1.6	2	1.67
1	4142	10.10.2007 8:23 PM	Emma	Bearded Collie	1	1	3	2	0	0	2	2	3	3	3	0	1	3	2	2							1.4	1.8	1.75	1.67
1	12067	12.16.2007 5:59 PM	emma	Bearded Collie	1	1	6	2	0	0	3	2	2	1	3	0	2	3	2	1							0.2	1.2	1	1.33
1	309	08.30.2007 11:48 PM	Emma	Bearded Collie	1	1	10	2	0	1	2	2	2	4	2	0	2	1	2	2							1	1.6	1.75	0.67
1	12801	12.27.2007 3:23 PM	faddle	Bearded Collie	1	1	14	1	1	0	2	2	3	2	3	1	1	0	1	2							1.8	1	1.75	1.33
1	12770	12.26.2007 9:55 PM	Fearghus	Bearded Collie	1	1	1.7	1	0	2	2	2	3	4	3	0	2	3	2	2							1.2	2	1.5	2
2	66165	09.06.2008 5:54 PM	felix	Bearded Collie	1	1	6	1	0	0	2	2	3	3	2	0	2	3			0	1	2	1	0	0					0.25
2	84784	12.01.2008 5:13 PM	Flocke	Bearded Collie	1	1	7	2	0	0	2	2	3	3	2	0	1	2			0	1	2	2	1	1					0.25
1	10438	12.03.2007 11:23 AM	Francis	Bearded Collie	1	1	4	1	0	2	2	2	3	2	2	0	2	3	2	2							1	1.6	1.75	2
1	13965	01.08.2008 9:48 AM	Frieda	Bearded Collie	1	1	1.1	2	0	2	2	2	3	3	3	0	2	2	2	2							1.4	1.8	2	2
2	54105	07.10.2008 2:36 PM	Frieda	Bearded Collie	1	1	1.5	2	1	0	2	2	3	2	1	0	2	2			0	1	2	1	1	0					0.83
2	64976	09.01.2008 12:52 PM	frodo	Bearded Collie	1	1	3	1	1	0	2	2	3	3	2	0	1	3			0	2	2	1	1	1					1
1	1533	09.16.2007 9:20 PM	Fynn	Bearded Collie	1	1	4	1	0	2	2	2	3	2	3	0	2	1	2	2							2	1.8	1.75	2
2	65324	09.03.2008 12:16 PM	Gordie	Bearded Collie	1	1	6	1	1	0	2	2	3	2	2	1	1	3			0	1	2	1	0	0					0.67
1	11015	12.07.2007 12:57 PM	gordy	Bearded Collie	1	1	0.5	1	0	1	2	2	3	2	3	0	2	2	2	2							1.4	2	2	2
2	80923	11.14.2008 6:13 PM	grisu	Bearded Collie	1	1	1	1	0	0	2	2	2	3	1	0	2	2			0	1	2	2	1	0					0.58
2	93265	01.10.2009 8:55 PM	Henry	Bearded Collie	1	1	8	1	0	1	2	1	4	1	2	1	1	2			0	2	2	1	0	0					0.67
2	61080	08.13.2008 11:29 PM	Jamie	Bearded Collie	1	1	4	1	0	0	2	2	3	3	3	0	2	1			1	1	2	1	1	0					0.42
1	2823	09.27.2007 4:18 PM	Jule	Bearded Collie	1	1	5	2	0	0	2	2	3	2	3	0	2	1	1	2							0.6	1.8	1.75	1.33
2	61069	08.13.2008 8:24 PM	jupp	Bearded Collie	1	1	10.5	1	1	3	2	2	3	4	2	0	1	0			0	1	2	2	1	0					0.33
1	1066	09.12.2007 12:36 PM	kasimir	Bearded Collie	1	1	7	1	0	3	1	2	3	1	2	1	3	3	2	2							1.8	2	2	1.33
1	5508	10.23.2007 12:17 PM	Kölbach	Bearded Collie	1	1	7	1	1	3	3	1	3	2	2	2	1	0	2	2							1.6	1.8	2	2
1	7637	11.09.2007 7:36 PM	lady	Bearded Collie	1	1	0.8	2	0	1	2	2	1	3	3	0	1	1	1	2							1.4	1.4	2	2
1	12029	12.16.2007 11:52 AM	Lana	Bearded Collie	1	1	0.8	2	1	1	2	2	3	3	3	1	3	3	2	2							1.2	1.8	2	2
2	90072	12.22.2008 9:23 PM	Lemmy	Bearded Collie	1	1	8	1	0	0	3	1	3	2	3	0	1	2			0	2	2	1	1	0					0.58
1	10137	12.01.2007 10:39 AM	Lilly	Bearded Collie	1	1	10	2	1	2	2	2	3	4	3	0	1	3	2	2							0.4	2	1.75	1.67
2	78295	11.03.2008 2:51 PM	Lilly	Bearded Collie	1	1	3	2	0	2	2	2	1	2	3	0	3	1			1	2	1	1	1	0					0.92
1	5170	10.19.2007 11:03 PM	Lissy	Bearded Collie	1	1	2	2	0	1	2	2	3	2	2	0	2	3	2	2							1.6	1.8	2	1
1	5644	10.24.2007 10:53 AM	Lotti	Bearded Collie	1	1	0.6	2	0	0	2	2	3	3	2	0	2	1	2	2							0.6	1.4	2	2
2	69525	09.24.2008 5:27 PM	Lucky	Bearded Collie	1	1	4	1	0	2	4	2	3	4	3	0	2	3			0	2	2	1	0	0					0.17
1	7102	11.04.2007 4:55 PM	Luna	Bearded Collie	1	1	0.4	2	0	3	2	2	2	2	3	0	2	1	2	2							2	1.6	1.75	1
1	5100	10.19.2007 3:11 PM	Luna	Bearded Collie	1	1	3.5	2	0	1	2	2	2	2	3	0	1	3	2	2							1.6	1.8	2	1
1	10486	12.03.2007 4:05 PM	Max	Bearded Collie	1	1	10	1	0	3	2	2	3	2	2	1	2	3	2	2							2	1.2	1.75	2
1	8010	11.13.2007 5:17 PM	merlin	Bearded Collie	1	1	1	1	0	3	2	2	3	3	2	0	2	3	2	2							1.2	1.6	2	1.33
1	5290	10.21.2007 2:14 PM	Merlin	Bearded Collie	1	1	5	1	0	2	2	2	3	3	2	0	2	3	1	2							1.2	1.6	2	1.33
2	71432	10.03.2008 4:03 PM	Merlin	Bearded Collie	1	1	5	1	0	0	2	2	3	4	3	0	2	3			1	2	2	1	1	0					0.92
2	72244	10.07.2008 11:00 PM	minning	Bearded Collie	1	1	1	1	0	1	2	2	3	4	2	0	2	1			0	2	2	2	1	0					0.75
1	13561	01.04.2008 3:14 PM	Momo	Bearded Collie	1	1	2	2	0	2	2	2	1	1	3	0	2	0	1	2							1	1.4	1.75	2
2	80146	11.12.2008 1:04 PM	Nayla	Bearded Collie	1	1	2	2	0	2	2	2	3	2	3	0	1	2			0	1	2	1	1	0					0.17
2	60564	08.11.2008 2:38 PM	nelson	Bearded Collie	1	1	2	1	1	0	2	2	2	4	2	0	1	3			0	1	2	1	0	0					0.42
1	10446	12.03.2007 12:36 PM	Nighty	Bearded Collie	1	1	0.6	2	0	2	2	2	3	2	3	0	2	0	2	2							1.2	1.2	1.75	2
1	7420	11.07.2007 3:51 PM	Noddy	Bearded Collie	1	1	8	1	0	2	2	2	3	3	1	0	2	0	2	2							1.6	1.4	2	1.33
1	7573	11.09.2007 8:26 AM	Oz	Bearded Collie	1	1	7	1	0	0	2	2	3	4	1	0	3	2	2	2							1.2	2	1.25	1
1	2755	09.26.2007 8:32 PM	pablo	Bearded Collie	1	1	3	1	1	0	3	2	3	2	3	0	2	3	1	2							2	2	2	2
1	13850	01.06.2008 11:15 PM	Paul	Bearded Collie	1	1	5.5	1	0	3	2	2	3	2	2	2	2	2	2	2							1.2	1.4	0.75	2
1	2770	09.26.2007 10:30 PM	paula	Bearded Collie	1	1	1.5	2	0	0	3	2	2	2	2	0	2	1	2	1							0.6	1.8	1.75	1.67
2	67483	09.14.2008 2:53 PM	Pauli	Bearded Collie	1	1	3	1	0	3	2	2	3	3	3	0	1	1			0	1	2	1	1	0					1
2	53804	07.09.2008 12:47 PM	Potter	Bearded Collie	1	1	0.7	1	0	2	2	2	2	3	2	0	2	3			0	1	2	1	1	0					0.58
1	4216	10.11.2007 6:03 PM	quinto	Bearded Collie	1	1	0.9	1	0	1	3	1	3	4	3	0	1	2	2	2							1	1.8	2	1.67
3	12320	12.19.2007 4:36 PM	Quito	Bearded Collie	1	1	4.5	1	0	1	2	2	3	3	1	0	1	3	1	2	0	1	2	1	1	0	0.4	2	2	1.33	0.75
1	2359	09.22.2007 5:43 PM	Richie	Bearded Collie	1	1	0.3	1	0	3	2	1	3	4	3	0	1	0	2	2							1.6	2	1.75	1
1	1553	09.16.2007 11:00 PM	Ronja	Bearded Collie	1	1	8	2	1	0	3	2	2	2	3	0	1	2	1	1							0.2	1.2	1.75	2
1	6406	10.30.2007 11:47 AM	Ronja	Bearded Collie	1	1	9	2	1	3	2	2	3	1	2	2	2	1	2	2							1.6	1.6	2	1
1	6505	10.30.2007 8:38 PM	Rudi	Bearded Collie	1	1	0.9	1	0	1	2	1	3	4	3	0	2	2	1	2							2	1.4	2	2
1	10488	12.03.2007 4:15 PM	Sally	Bearded Collie	1	1	9	2	1	3	2	2	3	2	2	1	2	3	2	2							1.4	2	1.5	1
1	10545	12.03.2007 8:36 PM	Sam	Bearded Collie	1	1	4	2	0	1	2	2	3	3	3	1	1	2	1	1							1	1.8	1	1
1	9122	11.23.2007 8:47 PM	Samson	Bearded Collie	1	1	0.5	1	0	0	2	2	2	4	2	0	1	2	1	2							1.2	1.6	2	2
2	82425	11.20.2008 11:32 AM	Samson vom Kyrbach	Bearded Collie	1	1	1.25	1	0	0	2	2	3	2	3	0	1	3			1	1	2	1	0	0					0.42
1	10155	12.01.2007 1:31 PM	Shaggy	Bearded Collie	1	1	3	2	1	1	2	1	3	3	2	0	2	3	1	2							2	2	2	2
2	66404	09.08.2008 1:30 PM	Shaggy	Bearded Collie	1	1	0.25	1	0	0	2	2	2	2	2	0	2	1			0	1	2	2	1	0					0.83
2	79514	11.09.2008 6:30 PM	snoopy	Bearded Collie	1	1	4.5	1	0	1	2	2	3	4	3	0	2	3			0	1	2	1	1	0					0.25
1	5229	10.20.2007 7:46 PM	Taya	Bearded Collie	1	1	4	2	1	3	2	2	3	1	3	2	2	3	2	2							0.4	1.8	2	1
1	1315	09.14.2007 6:27 PM	Tina	Bearded Collie	1	1	3	2	1	1	4	2	2	3	2	1	1	1	2	2							2	2	2	2
1	5727	10.24.2007 8:38 PM	Tipsy von der Bernsau	Bearded Collie	1	1	13	2	0	1	4	2	3	3	3	1	1	0	2	1							1.4	1.2	0	1
1	2609	09.25.2007 2:56 PM	Wilma	Bearded Collie	1	1	4	2	1	2	3	2	3	2	1	0	2	0	2	2							1.4	2	2	1.67
2	92588	01.07.2009 2:56 PM	wirth	Bearded Collie	1	1	0.3	2	0	0	3	2	3	4	2	0	1	1			0	1	2	1	1	0					0.83
2	65032	09.01.2008 6:51 PM	Wolke	Bearded Collie	1	1	1.2	2	0	2	2	2	3	1	2	0	3	0			0	3	3	2	0	0					0.83
2	66274	09.07.2008 1:32 PM	Zo	Bearded Collie	1	1	0.4	2	0	0	3	2	3	2	3	0	2	0			1	1	2	1	0	0					0.42
2	79687	11.10.2008 5:48 PM	Airis Blue Volshebny Svet	Bedlington Terrier	3	1	4	1	0	3	3	2	2	3	1	2	2	1			0	1	2	1	0	1					0.75
1	10897	12.06.2007 1:46 PM	lotte	Bedlington Terrier	3	1	5	2	1	3	3	2	3	3	1	2	3	3	2	2							0	1.2	0.75	0
1	367	08.31.2007 7:26 PM	Anna-Divina	Belgian Shepherd Dog - Groenendael	1	1	5	2	0	3	1	2	3	3	3	1	1	3	2	2							0.4	2	1.25	1
3	1302	09.14.2007 4:18 PM	Antaris	Belgian Shepherd Dog - Groenendael	1	1	6	2	0	2	3	2	3	4	2	1	2	3	2	2	0	1	2	2	0	1	1	2	0	1.67	0.17
1	1121	09.12.2007 7:15 PM	apollo	Belgian Shepherd Dog - Groenendael	1	1	5	1	0	2	2	2	3	3	3	1	2	3	2	2							1.2	2	1	2
2	67320	09.12.2008 9:54 PM	Baghi	Belgian Shepherd Dog - Groenendael	1	1	5	2	0	3	1	2	3	1	2	2	2	0			0	1	1	1	0	0					0.42
1	365	08.31.2007 7:20 PM	Divina	Belgian Shepherd Dog - Groenendael	1	1	9	2	0	2	2	2	3	3	3	1	2	3	2	2							2	2	1	2
2	78326	11.03.2008 5:41 PM	Esja	Belgian Shepherd Dog - Groenendael	1	1	3	2	0	0	2	2	3	4	1	0	3	3			0	1	2	2	1	0					0.83
1	1706	09.18.2007 12:11 PM	Fly`n Sh	Belgian Shepherd Dog - Groenendael	1	1	0.3	1	0	0	2	1	3	2	3	0	2	0	2	2							1.2	2	2	1.33
2	66693	09.10.2008 11:19 AM	gigi	Belgian Shepherd Dog - Groenendael	1	1	9	1	0	1	2	2	3	2	1	1	2	1			0	1	2	1	0	0					0.5
2	86369	12.08.2008 7:25 PM	Jazzmo	Belgian Shepherd Dog - Groenendael	1	1	5.5	1	1	2	2	2	3	1	2	0	2	0			0	1	3	2	0	0					0.5
1	1184	09.13.2007 11:51 AM	Kimba	Belgian Shepherd Dog - Groenendael	1	1	1.5	2	0	2	3	2	3	1	3	1	2	2	2	2							0.2	1.4	0.25	1.67
2	76884	10.27.2008 8:55 PM	Kronos	Belgian Shepherd Dog - Groenendael	1	1	0.6	1	0	2	2	2	2	2	2	0	2	1			0	1	2	1	1	0					0.42
2	93566	01.13.2009 10:57 AM	Luna	Belgian Shepherd Dog - Groenendael	1	1	6	2	1	0	4	2	3	1	2	0	3	0			0	1	2	1	0	0					0.75
1	10018	11.30.2007 8:10 AM	Malou	Belgian Shepherd Dog - Groenendael	1	1	1.5	2	0	1	2	1	3	2	2	2	2	3	2	2							1.2	1.4	1.25	1
2	89329	12.19.2008 1:42 PM	Marlo	Belgian Shepherd Dog - Groenendael	1	1	3	1	0	0	2	2	3	3	2	0	1	1			0	1	2	2	1	1					0.67
2	60444	08.10.2008 4:05 PM	Ria	Belgian Shepherd Dog - Groenendael	1	1	8	2	1	0	2	2	3	3	3	0	2	3			0	1	1	1	1	0					0.08
1	7829	11.11.2007 6:27 PM	Xando	Belgian Shepherd Dog - Groenendael	1	1	0.8	1	0	2	2	1	3	1	3	0	1	2	1	2							1.8	2	1.75	1.33
1	2822	09.27.2007 4:15 PM	Yukon	Belgian Shepherd Dog - Groenendael	1	1	1.3	1	0	2	2	2	4	3	2	1	2	2	1	2							1	2	1.75	1.67
2	53069	07.06.2008 7:13 AM	Abby	Belgian Shepherd Dog - Malinois	1	1	2.5	2	1	3	4	2	3	2	2	0	2	2			0	1	2	1	0	0					0.42
1	6728	11.01.2007 3:38 PM	Aimee	Belgian Shepherd Dog - Malinois	1	1	1	2	0	2	2	2	3	1	3	2	2	2	2	2							0.8	1.8	0.75	2
2	67068	09.11.2008 8:54 PM	Allegra	Belgian Shepherd Dog - Malinois	1	1	4	2	1	1	4	2	2	1	2	1	2	3			0	1	1	2	0	1					0.42
2	85803	12.05.2008 9:55 AM	Amy	Belgian Shepherd Dog - Malinois	1	1	3	2	1	2	3	2	2	2	2	1	1	0			0	1	2	1	1	1					0.33
2	83311	11.24.2008 8:36 PM	anka	Belgian Shepherd Dog - Malinois	1	1	3	2	1	1	3	1	3	1	2	0	1	0			0	1	2	1	0	0					0.75
2	61959	08.16.2008 10:08 PM	Arad	Belgian Shepherd Dog - Malinois	1	1	1.25	1	0	1	2	2	3	3	2	1	2	2			0	2	2	1	1	1					0.33
1	982	09.11.2007 7:20 PM	arco	Belgian Shepherd Dog - Malinois	1	1	8	1	0	0	2	1	3	1	3	0	3	3	1	2							1.8	1.6	1.25	2
1	10733	12.04.2007 11:13 PM	Ari	Belgian Shepherd Dog - Malinois	1	1	0.4	1	0	3	2	2	3	1	3	1	2	1	1	2							1	1	2	2
1	12165	12.17.2007 8:07 PM	Arie	Belgian Shepherd Dog - Malinois	1	1	2	1	0	0	2	2	3	2	2	0	2	3	2	2							1.2	2	1.75	2
1	9221	11.24.2007 7:56 PM	Arkan	Belgian Shepherd Dog - Malinois	1	1	7	1	0	3	2	1	3	1	3	0	3	3	1	1							0	1.8	1.75	2
1	5493	10.23.2007 9:24 AM	Aska	Belgian Shepherd Dog - Malinois	1	1	0.9	2	0	1	2	2	2	2	2	1	2	2	2	2							0.8	1.6	2	1.33
2	94545	01.16.2009 8:41 AM	bac	Belgian Shepherd Dog - Malinois	1	1	3	1	0	2	2	1	3	2	2	2	3	3			0	2	2	1	1	0					0.83
1	11942	12.14.2007 9:25 PM	Basta	Belgian Shepherd Dog - Malinois	1	1	3	1	1	2	2	2	3	2	1	0	3	3	2	2							0	1	0.5	2
1	8272	11.16.2007 2:55 PM	beetz,jens	Belgian Shepherd Dog - Malinois	1	1	1	1	0	3	2	1	3	2	3	1	3	1	1	1							1	1.8	0.5	1
2	87713	12.13.2008 7:52 PM	ben	Belgian Shepherd Dog - Malinois	1	1	4	1	1	3	4	2	3	2	3	1	2	3			1	2	2	2	0	0					0.5
2	70513	09.29.2008 11:44 PM	Bonny	Belgian Shepherd Dog - Malinois	1	1	0.9	2	0	1	3	2	3	2	3	0	3	1			1	2	2	2	1	0					0.67
1	3102	09.30.2007 8:32 PM	Brandl	Belgian Shepherd Dog - Malinois	1	1	2.2	1	0	3	2	1	3	2	2	2	3	2	2	2							1.6	2	1.25	1.67
2	93224	01.10.2009 10:40 AM	Bruno	Belgian Shepherd Dog - Malinois	1	1	3	1	0	1	3	2	3	2	2	1	2	3			0	1	2	1	0	0					0.5
3	9915	11.29.2007 2:14 PM	Buddy	Belgian Shepherd Dog - Malinois	1	1	3	1	1	3	3	2	3	1	2	0	2	1	2	2	0	1	2	1	0	0	0.6	2	1	1.67	0.25
1	8965	11.22.2007 1:59 PM	Bufy	Belgian Shepherd Dog - Malinois	1	1	4	2	0	3	4	2	3	4	3	0	1	1	1	1							0	1	0.25	1.67
1	3336	10.03.2007 9:42 AM	Bux	Belgian Shepherd Dog - Malinois	1	1	2	1	0	1	2	1	2	2	2	0	2	3	2	2							1.6	1.8	1	2
1	11354	12.09.2007 7:57 PM	Bux	Belgian Shepherd Dog - Malinois	1	1	3	1	0	1	2	2	2	3	2	0	2	3	2	2							0.8	1.6	0.75	2
1	8754	11.20.2007 6:09 PM	cambo	Belgian Shepherd Dog - Malinois	1	1	0.5	1	0	1	2	2	3	3	2	1	2	0	1	2							0.6	1.8	0.75	1.33
1	3806	10.07.2007 6:12 PM	Cash	Belgian Shepherd Dog - Malinois	1	1	2.5	1	0	3	2	1	2	2	2	2	3	1	1	2							0.6	2	1	2
1	8601	11.19.2007 1:42 PM	CHACO	Belgian Shepherd Dog - Malinois	1	1	5	1	0	3	4	2	4	1	2	0	2	1	2	2							1.8	1.8	1.5	2
2	54149	07.10.2008 5:49 PM	chicco	Belgian Shepherd Dog - Malinois	1	1	6	1	0	3	4	2	4	1	1	2	3	1			0	2	2	1	0	1					0.33
1	7266	11.06.2007 11:24 AM	Clara	Belgian Shepherd Dog - Malinois	1	1	0.4	2	0	2	2	2	3	3	3	1	2	1	2	2							0.4	2	1.5	2
1	11807	12.13.2007 10:12 AM	Cora	Belgian Shepherd Dog - Malinois	1	1	5	2	0	3	4	1	3	1	2	0	3	0	2	2							0.6	2	0.75	0.67
2	92084	01.04.2009 8:37 PM	Corba	Belgian Shepherd Dog - Malinois	1	1	0.75	1	1	2	3	2	3	2	1	0	1	0			0	2	3	2	0	0					0.75
1	5162	10.19.2007 9:28 PM	Diana	Belgian Shepherd Dog - Malinois	1	1	7	2	1	0	3	1	2	3	3	2	2	2	1	2							0.8	1.8	1.25	2
1	6747	11.01.2007 6:51 PM	Drago	Belgian Shepherd Dog - Malinois	1	1	0.7	1	0	2	2	2	3	2	3	1	2	2	2	1							1.8	1.8	1.75	2
1	6951	11.03.2007 4:32 PM	emma	Belgian Shepherd Dog - Malinois	1	1	1.8	2	0	2	2	2	3	2	3	0	2	3	1	2							1.2	2	0.25	1.67
1	5823	10.25.2007 1:16 PM	Fame	Belgian Shepherd Dog - Malinois	1	1	1.5	2	0	2	2	2	2	2	2	1	2	3	2	2							1.4	1.8	0.5	2
2	59784	08.07.2008 7:47 AM	Fanny	Belgian Shepherd Dog - Malinois	1	1	2	2	1	1	4	2	3	1	3	0	2	2			1	1	2	1	0	0					0.58
2	54723	07.14.2008 11:21 AM	Finn	Belgian Shepherd Dog - Malinois	1	1	2	1	1	1	4	2	2	3	1	1	2	2			0	2	1	2	1	1					0.58
1	2254	09.21.2007 11:13 AM	Furax	Belgian Shepherd Dog - Malinois	1	1	10	1	1	2	4	1	4	4	2	0	1	0	2	2							1	0.6	1.5	0.33
1	8238	11.16.2007 8:12 AM	gayal	Belgian Shepherd Dog - Malinois	1	1	1	1	0	1	2	1	2	3	3	1	3	0	2	2							0.2	1.8	0.5	1.33
2	87024	12.11.2008 10:46 AM	Gina	Belgian Shepherd Dog - Malinois	1	1	0.6	2	1	0	3	2	3	4	3	2	1	2			1	3	2	1	1	0					1.08
1	11913	12.14.2007 4:37 PM	Gucci	Belgian Shepherd Dog - Malinois	1	1	1	1	0	2	3	2	2	2	1	0	2	2	2	1							1.2	1.8	1.75	2
2	60605	08.11.2008 6:55 PM	Harmony	Belgian Shepherd Dog - Malinois	1	1	2	2	1	3	3	2	3	1	1	2	2	1			0	2	2	1	1	1					0.83
2	64822	08.31.2008 2:54 PM	Jamie	Belgian Shepherd Dog - Malinois	1	1	10	2	1	0	3	2	3	4	2	0	2	0			0	1	2	1	0	0					0.33
1	3927	10.08.2007 8:10 PM	Jan de Kruif	Belgian Shepherd Dog - Malinois	1	1	4	1	0	3	4	1	3	2	2	0	1	1	1	2							1.2	1.4	0.75	2
2	63445	08.24.2008 9:21 AM	Jara	Belgian Shepherd Dog - Malinois	1	1	4	2	1	3	3	2	3	3	1	0	2	1			0	1	2	1	0	1					0.17
1	10717	12.04.2007 9:11 PM	Jazz	Belgian Shepherd Dog - Malinois	1	1	9	2	1	3	3	2	3	2	2	2	1	2	2	2							1.4	1.6	1.5	2
1	6152	10.28.2007 8:19 AM	Jessy	Belgian Shepherd Dog - Malinois	1	1	6	2	1	0	3	2	3	1	3	0	1	2	1	1							1.2	1.4	1.25	2
1	8710	11.20.2007 12:17 PM	Joe	Belgian Shepherd Dog - Malinois	1	1	0.9	1	0	3	2	2	3	3	3	2	2	1	1	1							1.6	1.6	0.75	1.33
1	10051	11.30.2007 2:41 PM	Kencer	Belgian Shepherd Dog - Malinois	1	1	2	1	1	0	4	2	2	1	1	0	3	2	2	2							1.6	2	0.5	1.67
1	13794	01.06.2008 5:12 PM	Kenzo	Belgian Shepherd Dog - Malinois	1	1	1.5	1	0	1	2	2	3	3	2	1	2	2	1	2							1	2	1.25	1.33
1	8050	11.14.2007 11:38 AM	Kim	Belgian Shepherd Dog - Malinois	1	1	1	2	0	2	2	1	3	3	3	0	1	1	2	2							0.4	1.2	2	1.67
2	53950	07.09.2008 9:32 PM	Kyra	Belgian Shepherd Dog - Malinois	1	1	7	2	1	0	4	1	3	1	3	0	1	0			0	2	2	1	0	0					0.33
2	73904	10.14.2008 2:20 PM	LEO	Belgian Shepherd Dog - Malinois	1	1	1	1	1	0	2	2	2	1	2	0	3	3			0	1	1	2	1	0					1.17
1	2198	09.20.2007 8:16 PM	linus	Belgian Shepherd Dog - Malinois	1	1	1.5	1	0	2	3	1	3	1	2	2	2	3	1	2							0.4	1.4	2	2
1	8811	11.21.2007 8:21 AM	Lucy	Belgian Shepherd Dog - Malinois	1	1	5	2	0	2	2	1	3	2	1	0	2	2	2	2							0.6	2	1.5	1.33
1	13041	12.29.2007 9:38 PM	Maggie	Belgian Shepherd Dog - Malinois	1	1	10	2	0	2	2	2	2	3	3	0	2	2	2	2							1.8	2	1.5	1.67
1	5131	10.19.2007 6:32 PM	Marnie	Belgian Shepherd Dog - Malinois	1	1	8	2	1	0	2	2	3	2	2	0	2	3	2	2							0	1.2	0.25	0
1	12925	12.28.2007 7:14 PM	mika	Belgian Shepherd Dog - Malinois	1	1	2	1	0	3	3	1	3	2	3	1	3	1	2	2							1.8	2	0.5	2
1	6844	11.02.2007 4:19 PM	Molly	Belgian Shepherd Dog - Malinois	1	1	2.5	2	1	2	2	2	3	3	2	2	2	3	2	2							1.4	2	0.5	2
2	65330	09.03.2008 1:13 PM	Neal Turner	Belgian Shepherd Dog - Malinois	1	1	2	2	0	2	2	1	3	2	2	2	2	2			0	2	2	1	1	0					0.42
2	81289	11.15.2008 8:56 PM	Neo	Belgian Shepherd Dog - Malinois	1	1	1	1	0	3	2	2	2	2	1	1	2	3			0	1	2	1	1	1					0.5
2	53084	07.06.2008 8:56 AM	Nicki	Belgian Shepherd Dog - Malinois	1	1	4	1	1	0	4	1	3	2	2	1	2	0			0	2	3	2	1	1					0.67
1	7471	11.08.2007 11:55 AM	paul	Belgian Shepherd Dog - Malinois	1	1	3	1	0	0	4	2	3	4	1	0	1	1	2	2							0.4	1.6	1	1.67
2	77013	10.28.2008 11:13 AM	Paula	Belgian Shepherd Dog - Malinois	1	1	0.75	2	0	1	2	2	2	2	2	1	2	2			0	2	2	2	1	1					0.5
1	8360	11.17.2007 9:39 AM	peter	Belgian Shepherd Dog - Malinois	1	1	1.2	1	0	1	4	1	3	2	3	1	2	2	1	2							0	2	0	1.33
1	9764	11.28.2007 2:22 PM	Prinz	Belgian Shepherd Dog - Malinois	1	1	4	1	0	1	4	1	3	1	3	0	2	0	2	2							0.8	2	0.5	1
2	73349	10.11.2008 8:09 PM	Questa	Belgian Shepherd Dog - Malinois	1	1	6	2	1	1	2	2	3	3	3	0	2	3			0	1	2	1	1	0					0.5
2	64673	08.29.2008 9:44 PM	Ramstein	Belgian Shepherd Dog - Malinois	1	1	1.25	2	0	2	2	2	2	2	2	2	2	2			0	1	2	2	1	1					0.42
1	9305	11.25.2007 3:28 PM	Raya	Belgian Shepherd Dog - Malinois	1	1	1	2	0	0	2	2	2	3	1	0	2	3	2	2							1.8	2	1.25	2
1	9561	11.26.2007 10:22 PM	Rebell	Belgian Shepherd Dog - Malinois	1	1	4	1	1	1	2	2	3	3	1	1	1	2	2	2							1	2	2	1.67
1	12816	12.27.2007 5:53 PM	Reuter	Belgian Shepherd Dog - Malinois	1	1	0.2	2	0	1	2	2	3	3	3	0	1	0	2	2							2	2	1.75	2
2	66261	09.07.2008 12:11 PM	riko	Belgian Shepherd Dog - Malinois	1	1	2.5	2	1	2	4	1	2	3	1	2	2	2			0	1	3	1	0	0					0.42
2	59246	08.04.2008 4:12 PM	Rino	Belgian Shepherd Dog - Malinois	1	1	6	2	1	1	2	2	3	1	2	2	2	3			0	1	2	2	0	1					0.33
2	90781	12.27.2008 2:26 PM	Ruben	Belgian Shepherd Dog - Malinois	1	1	1	1	0	0	2	2	2	2	2	0	3	1			0	1	2	1	1	0					0.58
1	2190	09.20.2007 7:33 PM	Sam	Belgian Shepherd Dog - Malinois	1	1	8	1	1	3	1	2	3	1	2	1	1	3	2	1							1	1.4	1	2
1	7976	11.13.2007 1:32 PM	sam	Belgian Shepherd Dog - Malinois	1	1	8	1	1	1	2	2	3	4	3	2	2	3	2	2							0	2	1.5	1.67
1	13150	12.30.2007 10:47 PM	sammy	Belgian Shepherd Dog - Malinois	1	1	1.2	1	0	3	2	2	2	3	2	0	1	1	2	2							0.4	1.6	1.75	2
1	8506	11.18.2007 6:05 PM	sass	Belgian Shepherd Dog - Malinois	1	1	2	2	0	3	2	2	3	4	2	0	1	0	2	2							1.4	2	1.75	1
2	62398	08.19.2008 2:36 PM	sells	Belgian Shepherd Dog - Malinois	1	1	0.8	1	0	2	2	2	3	1	2	2	1	2			0	2	2	2	0	0					0.33
1	61	08.29.2007 10:17 AM	Shadow	Belgian Shepherd Dog - Malinois	1	1	2	2	0	1	2	2	3	1	2	0	1	0	2	2							1.8	1	1.75	2
1	4532	10.14.2007 9:30 PM	Shadow	Belgian Shepherd Dog - Malinois	1	1	6	1	1	2	3	2	2	2	2	1	2	1	2	2							0.8	0.4	1.75	0.33
1	5006	10.18.2007 10:36 PM	Shakty	Belgian Shepherd Dog - Malinois	1	1	3	1	0	2	4	2	2	4	3	0	2	2	2	2							1	2	2	1.67
1	6567	10.31.2007 1:18 PM	shandor	Belgian Shepherd Dog - Malinois	1	1	2	1	0	2	2	2	3	2	2	0	2	3	2	1							0.6	1.8	0.75	1.33
1	2957	09.29.2007 1:22 AM	ss	Belgian Shepherd Dog - Malinois	1	1	1.5	1	0	3	3	2	3	4	2	0	3	2	1	2							1	2	1.25	2
2	85144	12.03.2008 7:24 AM	stenzel	Belgian Shepherd Dog - Malinois	1	1	2	1	0	3	2	2	3	3	3	2	2	3			1	2	2	2	1	1					0.17
1	13482	01.03.2008 7:14 PM	suki	Belgian Shepherd Dog - Malinois	1	1	0.9	2	0	1	3	2	3	2	3	0	1	1	1	2							1.2	1.6	1.75	2
1	8559	11.18.2007 11:50 PM	taifun	Belgian Shepherd Dog - Malinois	1	1	0.2	1	0	1	2	1	3	2	2	0	1	0	2	2							1.4	1.6	1.75	2
1	12906	12.28.2007 5:25 PM	Taylor vom Satansberg	Belgian Shepherd Dog - Malinois	1	1	5	1	0	3	2	2	3	3	3	0	2	2	1	2							1.4	2	1	2
2	65091	09.02.2008 9:58 AM	Trigon	Belgian Shepherd Dog - Malinois	1	1	2.75	1	0	1	4	2	2	4	3	0	2	1			0	2	2	1	1	0					0.25
1	11349	12.09.2007 7:33 PM	varus	Belgian Shepherd Dog - Malinois	1	1	1.8	1	0	2	2	1	3	2	3	1	2	2	2	2							1.8	2	1	1.33
1	10650	12.04.2007 3:58 PM	Vega	Belgian Shepherd Dog - Malinois	1	1	4	2	0	1	4	2	3	2	2	0	2	0	1	2							1.4	1.6	0.5	1.67
1	9373	11.25.2007 8:52 PM	yazz	Belgian Shepherd Dog - Malinois	1	1	1.3	2	0	3	3	2	3	2	2	2	3	2	2	2							1	2	1	2
1	9618	11.27.2007 2:31 PM	Zascha	Belgian Shepherd Dog - Malinois	1	1	2	2	0	2	4	2	2	1	2	0	1	0	2	2							0.8	0.6	2	0.67
2	89984	12.22.2008 11:05 AM	Aaron	Belgian Shepherd Dog - not specified	1	1	7	1	1	0	2	2	1	2	3	0	1	3			0	2	2	2	1	1					0.42
1	6149	10.28.2007 7:15 AM	Avanti	Belgian Shepherd Dog - not specified	1	1	0.3	1	0	3	2	2	3	4	3	1	1	1	2	2							1.4	1.8	2	1.33
1	7910	11.12.2007 5:08 PM	balou	Belgian Shepherd Dog - not specified	1	1	5	1	0	1	3	1	3	3	3	2	2	2	2	2							2	2	2	1.33
1	13264	01.01.2008 4:02 PM	balu	Belgian Shepherd Dog - not specified	1	1	4	1	0	0	4	2	3	4	1	0	3	0	1	2							0	1.8	0	0.67
2	89743	12.21.2008 10:22 AM	beate	Belgian Shepherd Dog - not specified	1	1	6	2	1	0	2	2	3	2	3	0	1	3			1	1	2	1	1	0					0.58
1	8089	11.14.2007 6:13 PM	benny	Belgian Shepherd Dog - not specified	1	1	0.6	1	0	3	2	1	3	1	3	0	2	2	1	2							1.2	1.8	1.75	1
2	91328	12.30.2008 10:23 PM	bobby	Belgian Shepherd Dog - not specified	1	1	3.5	1	1	0	3	1	3	1	3	0	2	1			1	1	2	1	1	0					0.67
1	7376	11.07.2007 11:20 AM	Budge	Belgian Shepherd Dog - not specified	1	1	0.4	1	0	3	2	1	3	1	3	1	2	1	1	2							0.8	2	1.25	2
1	1719	09.18.2007 1:05 PM	BUDGES	Belgian Shepherd Dog - not specified	1	1	0.4	1	0	3	2	1	4	1	3	0	2	1	1	2							2	2	1.5	1.67
1	5574	10.23.2007 7:21 PM	Cancer	Belgian Shepherd Dog - not specified	1	1	3	1	1	1	4	2	2	3	2	0	3	2	2	2							0.6	2	0.25	2
1	2210	09.20.2007 9:32 PM	cindy	Belgian Shepherd Dog - not specified	1	1	10	2	0	1	4	2	1	3	3	0	1	2	1	1							1.8	1	1.75	1
1	4863	10.17.2007 5:37 PM	Darius	Belgian Shepherd Dog - not specified	1	1	1	1	1	1	4	2	2	2	2	1	2	1	2	2							0	1.6	1.25	1.33
2	87710	12.13.2008 7:41 PM	Dina	Belgian Shepherd Dog - not specified	1	1	3	2	0	1	2	1	2	1	3	0	1	0			1	1	2	2	1	1					1.08
1	12040	12.16.2007 2:14 PM	Elvis	Belgian Shepherd Dog - not specified	1	1	6	1	1	0	2	1	3	3	3	0	1	2	2	2							0.2	1.8	1.25	1.67
2	53128	07.06.2008 12:09 PM	Fantaghiro	Belgian Shepherd Dog - not specified	1	1	1.5	2	0	0	2	2	2	4	2	0	2	3			0	1	2	1	1	1					0.58
2	67980	09.16.2008 11:08 PM	fritz	Belgian Shepherd Dog - not specified	1	1	14	1	1	2	4	2	3	3	3	0	2	0			1	2	2	1	1	0					0.42
1	3576	10.05.2007 10:19 AM	Jenna	Belgian Shepherd Dog - not specified	1	1	3	2	1	1	2	2	3	4	3	0	1	0	1	1							0	1.6	2	1.67
2	60615	08.11.2008 9:40 PM	Jessy	Belgian Shepherd Dog - not specified	1	1	12	2	0	3	2	2	3	1	3	1	1	1			0	1	2	2	1	0					0.25
2	78145	11.02.2008 1:55 PM	Jupp	Belgian Shepherd Dog - not specified	1	1	3	1	0	0	2	2	3	1	2	0	1	3			0	1	2	1	1	0					0.92
1	8309	11.16.2007 7:33 PM	Keiko	Belgian Shepherd Dog - not specified	1	1	2	1	0	3	2	1	3	2	2	0	2	3	2	2							1.4	2	1	1.33
1	5910	10.26.2007 7:47 AM	Kessy	Belgian Shepherd Dog - not specified	1	1	5	2	1	1	2	2	2	3	3	0	2	1	1	2							0.4	2	1	2
1	10313	12.02.2007 1:49 PM	Kim	Belgian Shepherd Dog - not specified	1	1	0.8	2	0	3	2	2	3	3	3	0	3	1	1	2							1.8	1.8	1.25	2
1	2348	09.22.2007 2:47 PM	kira	Belgian Shepherd Dog - not specified	1	1	6	2	1	1	4	2	3	3	1	0	2	2	2	2							1	1.6	1.75	2
1	865	09.10.2007 5:09 PM	Lany	Belgian Shepherd Dog - not specified	1	1	1.3	2	0	0	3	2	2	2	2	0	3	0	2	2							0.8	1.8	1.5	2
1	4689	10.16.2007 11:01 AM	Lea	Belgian Shepherd Dog - not specified	1	1	3	2	0	1	4	2	3	2	3	0	1	3	2	2							1	2	1.25	2
2	78963	11.06.2008 3:31 PM	Leya	Belgian Shepherd Dog - not specified	1	1	9	2	0	2	2	2	3	2	1	0	1	2			0	1	2	1	1	0					0
2	91921	01.03.2009 5:12 PM	Leyla	Belgian Shepherd Dog - not specified	1	1	1.5	2	0	0	2	2	1	2	3	0	2	0			0	3	2	2	1	0					0.58
1	3592	10.05.2007 12:05 PM	Lotte	Belgian Shepherd Dog - not specified	1	1	3	2	0	1	2	2	1	2	3	2	1	0	1	1							0.4	1.4	1.5	0.33
1	2392	09.23.2007 9:12 AM	Merlin	Belgian Shepherd Dog - not specified	1	1	5	1	1	1	4	2	3	3	3	1	1	1	2	2							1.2	1.6	1.75	0.67
1	108	08.29.2007 2:27 PM	Mika	Belgian Shepherd Dog - not specified	1	1	0.6	1	0	3	2	2	3	1	3	1	2	3	2	2							2	2	2	2
1	4091	10.10.2007 12:49 PM	Moritz	Belgian Shepherd Dog - not specified	1	1	6	1	0	0	2	2	3	1	2	0	1	2	1	1							0	0.6	2	0
2	91944	01.03.2009 11:19 PM	n	Belgian Shepherd Dog - not specified	1	1	0.5	1	0	2	2	2	3	3	2	0	3	1			0	2	2	1	0	0					1.33
2	95167	01.19.2009 4:05 PM	nelly	Belgian Shepherd Dog - not specified	1	1	2	2	1	0	3	1	1	2	2	0	1	0			1	1	2	2	1	0					0.67
2	61986	08.17.2008 9:23 AM	nico	Belgian Shepherd Dog - not specified	1	1	1.5	1	0	3	3	2	3	3	3	0	3	1			0	1	2	2	1	0					1.25
2	64819	08.31.2008 2:37 PM	sky	Belgian Shepherd Dog - not specified	1	1	2	1	0	1	4	2	2	1	1	0	2	0			0	1	2	2	1	0					0.5
2	71653	10.05.2008 6:40 PM	story	Belgian Shepherd Dog - not specified	1	1	2	2	1	1	3	2	3	1	3	1	1	1			1	1	2	1	1	1					1.5
1	2361	09.22.2007 6:31 PM	Tequila	Belgian Shepherd Dog - not specified	1	1	7	2	1	1	4	2	3	2	3	0	2	1	1	2							0.2	1.6	2	0.67
1	3350	10.03.2007 11:59 AM	ulla	Belgian Shepherd Dog - not specified	1	1	3	2	0	2	3	2	3	2	2	1	1	0	2	2							0.4	1.6	0.25	2
1	10396	12.02.2007 9:40 PM	Wuttke	Belgian Shepherd Dog - not specified	1	1	0.2	1	0	3	2	1	3	1	3	1	2	0	2	2							0.8	1.2	2	1.67
1	1119	09.12.2007 7:08 PM	asco	Belgian Shepherd Dog - Tervuren	1	1	9	1	0	1	2	2	3	3	3	1	2	3	2	2							0.2	1.6	2	1.33
1	1969	09.19.2007 6:32 PM	Derius	Belgian Shepherd Dog - Tervuren	1	1	1.5	1	0	3	1	2	3	3	3	2	2	3	2	1							0.4	1.2	2	0.67
2	93161	01.10.2009 12:04 AM	Dingo	Belgian Shepherd Dog - Tervuren	1	1	7	1	0	3	2	2	3	4	2	0	2	3			0	1	2	1	0	0					0.5
1	10274	12.02.2007 8:03 AM	Eijk	Belgian Shepherd Dog - Tervuren	1	1	5	1	0	2	2	2	3	1	1	1	2	3	2	2							1.4	2	1	2
1	1569	09.17.2007 9:47 AM	eik vom bronkahof	Belgian Shepherd Dog - Tervuren	1	1	4	1	0	3	2	2	3	1	2	1	2	2	2	1							0.4	2	2	2
2	53080	07.06.2008 8:27 AM	Fanja	Belgian Shepherd Dog - Tervuren	1	1	1.5	2	0	0	2	2	2	4	2	0	2	3			0	1	2	1	1	1					0.58
1	2775	09.26.2007 11:26 PM	Felix	Belgian Shepherd Dog - Tervuren	1	1	4	1	0	3	2	2	3	4	2	0	1	0	2	2							1.8	2	1.75	1.67
1	12476	12.21.2007 4:47 PM	Gitane	Belgian Shepherd Dog - Tervuren	1	1	0.8	2	0	2	2	2	3	4	2	1	2	3	2	2							0.8	1.4	1.25	1.67
2	63803	08.26.2008 2:17 PM	Jurika	Belgian Shepherd Dog - Tervuren	1	1	14	2	1	0	2	1	3	1	2	1	1	2			0	1	2	1	1	1					0.5
2	54368	07.11.2008 2:45 PM	Luna	Belgian Shepherd Dog - Tervuren	1	1	1.4	2	0	1	2	2	3	2	3	0	1	3			1	1	2	1	0	0					0.33
2	57727	07.27.2008 11:58 AM	Tequila	Belgian Shepherd Dog - Tervuren	1	1	8	2	1	1	4	2	3	2	3	0	2	2			0	1	2	1	0	0					0.42
2	93298	01.11.2009 2:10 PM	Tim	Belgian Shepherd Dog - Tervuren	1	1	1	1	0	3	2	1	3	2	2	1	2	3			0	1	2	1	0	0					0.08
1	4232	10.11.2007 8:41 PM	Akira	Berger de Beauce	1	1	4	2	0	1	2	2	3	1	2	0	2	2	1	2							0.6	2	1	1.33
2	56157	07.21.2008 2:43 PM	Bailey	Berger de Beauce	1	1	1.2	2	0	1	3	2	2	3	3	2	2	3			1	2	1	1	1	0					0.42
2	79518	11.09.2008 6:54 PM	blake	Berger de Beauce	1	1	0.8	1	0	1	2	2	3	3	3	0	2	3			1	2	3	2	1	0					0.83
1	5187	10.20.2007 12:40 PM	Bodo	Berger de Beauce	1	1	3	1	0	3	2	1	3	2	3	2	3	2	2	2							1	1.8	1.75	0.67
1	2789	09.27.2007 10:23 AM	Chipette	Berger de Beauce	1	1	12	2	1	1	2	2	3	2	2	0	1	1	2	1							0	1.8	1.5	0.67
1	2148	09.20.2007 1:54 PM	Chris	Berger de Beauce	1	1	3	1	0	2	4	2	2	3	2	2	1	0	1	1							1.2	1.6	1	1
1	9265	11.25.2007 9:44 AM	Crampas	Berger de Beauce	1	1	0.5	1	0	0	2	2	3	2	2	0	1	2	1	2							1	1.8	2	0.67
1	13127	12.30.2007 7:54 PM	Dacota	Berger de Beauce	1	1	0.3	1	0	2	2	2	3	4	2	0	3	1	2	2							1	1.8	2	0.67
1	2116	09.20.2007 11:42 AM	Emgenbroich	Berger de Beauce	1	1	1.3	1	0	1	2	2	3	2	2	0	2	3	2	2							1.4	1.6	2	2
2	77371	10.29.2008 10:11 PM	Kr?mel	Berger de Beauce	1	1	2	1	0	1	2	2	3	4	2	0	2	3			0	1	2	2	0	0					0.42
1	273	08.30.2007 5:42 PM	laurie	Berger de Beauce	1	1	3	2	1	2	2	2	3	4	3	1	2	3	1	1							1.6	1.4	2	0.33
1	4027	10.09.2007 7:14 PM	Paco	Berger de Beauce	1	1	1.9	1	0	2	2	2	3	1	3	0	2	3	1	2							1.2	1.6	2	2
1	3737	10.06.2007 8:49 PM	sam	Berger de Beauce	1	1	2	1	0	0	2	2	3	3	3	2	2	2	1	2							1.2	2	1.75	1
1	9024	11.22.2007 9:04 PM	Syrun	Berger de Beauce	1	1	6	1	0	3	3	2	3	2	1	1	2	3	2	2							1.6	2	1.5	1.67
1	13411	01.02.2008 11:26 PM	Vasco	Berger de Beauce	1	1	3	1	0	2	3	2	3	1	1	0	2	2	1	1							0.2	1.6	0.25	1
1	2415	09.23.2007 1:39 PM		Bernese Mountain Dog	2	1	1.2	1	0	0	2	2	3	4	2	0	3	2	2	2							1.8	1.8	1.25	2
1	5871	10.25.2007 7:14 PM	aika	Bernese Mountain Dog	2	1	0.5	2	0	0	2	2	2	2	2	0	1	1	2	2							1.2	1.4	1.75	0.33
1	9757	11.28.2007 1:47 PM	alina	Bernese Mountain Dog	2	1	1.5	2	1	1	2	2	3	2	1	1	2	2	2	2							0.8	1.6	2	2
1	4137	10.10.2007 7:25 PM	amy	Bernese Mountain Dog	2	1	5	2	1	2	2	2	2	1	3	0	2	0	2	1							1.4	1.2	1.75	0.33
1	9066	11.23.2007 1:35 PM	Anubis	Bernese Mountain Dog	2	1	0.4	1	0	1	2	2	2	2	2	0	2	1	2	2							1.6	1.2	2	2
2	59928	08.07.2008 8:32 PM	Aragon	Bernese Mountain Dog	2	1	5	1	0	1	2	2	2	2	2	0	2	1			0	1	2	2	1	1					0.83
2	71678	10.05.2008 10:58 PM	argo	Bernese Mountain Dog	2	1	5	2	0	3	1	2	3	4	3	1	2	0			0	1	2	1	0	0					0.17
1	8011	11.13.2007 5:30 PM	Balu	Bernese Mountain Dog	2	1	4	1	0	1	2	1	3	4	3	0	1	0	1	2							1.6	1.8	1.75	0
1	10267	12.02.2007 1:22 AM	Balu	Bernese Mountain Dog	2	1	9	1	1	0	2	2	2	2	3	0	1	2	2	2							1.6	0.6	2	1.67
2	92343	01.06.2009 1:00 PM	Barry	Bernese Mountain Dog	2	1	2	1	1	1	2	2	3	3	3	1	2	0			0	1	2	1	1	1					1.33
1	6287	10.29.2007 12:22 PM	Bear	Bernese Mountain Dog	2	1	0.6	1	0	0	2	2	2	2	3	0	1	0	1	2							1.4	1.2	1.75	2
1	5293	10.21.2007 2:42 PM	ben	Bernese Mountain Dog	2	1	2.5	1	1	1	3	2	2	1	2	2	2	1	2	2							0.6	1.8	0.5	2
2	55270	07.16.2008 1:53 PM	Benno	Bernese Mountain Dog	2	1	3	1	0	0	2	2	1	1	3	0	2	2			1	2	2	2	1	0					0.5
1	3431	10.03.2007 8:48 PM	berry	Bernese Mountain Dog	2	1	8	1	0	1	2	2	2	3	1	0	1	0	2	2							1.6	1.6	1.25	2
1	3459	10.04.2007 8:42 AM	Biene	Bernese Mountain Dog	2	1	3	2	0	0	2	2	3	3	3	2	2	0	1	2							1.4	2	1.75	1.67
1	10776	12.05.2007 4:15 PM	Bjarki	Bernese Mountain Dog	2	1	1.5	1	0	1	2	2	3	4	3	0	2	3	2	2							2	2	2	2
2	53281	07.07.2008 2:21 PM	Bono	Bernese Mountain Dog	2	1	2.25	1	0	1	2	1	3	2	2	0	1	2			0	1	2	1	1	0					0.67
2	59904	08.07.2008 6:37 PM	Brody	Bernese Mountain Dog	2	1	3	1	0	2	3	2	3	3	3	0	1	1			0	3	1	1	0	0					0.67
1	7574	11.09.2007 8:32 AM	Buddy	Bernese Mountain Dog	2	1	2	1	1	2	2	2	2	2	3	1	1	0	1	1							1.2	1.8	1.75	1
2	54127	07.10.2008 3:58 PM	Campino	Bernese Mountain Dog	2	1	5	1	0	0	2	1	3	2	2	0	1	2			0	1	2	1	1	1					0.58
1	163	08.29.2007 9:36 PM	Carlo	Bernese Mountain Dog	2	1	1.5	1	1	2	2	2	3	3	3	0	2	3	2	2							2	2	2	1.67
1	12982	12.29.2007 3:00 PM	Carlo	Bernese Mountain Dog	2	1	1.6	1	0	0	3	2	3	3	2	0	3	2	2	2							1.4	1.8	1.5	2
1	12143	12.17.2007 3:32 PM	caruso	Bernese Mountain Dog	2	1	2	1	0	1	2	2	3	2	3	2	2	2	2	2							2	2	2	2
1	7205	11.05.2007 3:59 PM	Cherry	Bernese Mountain Dog	2	1	0.2	2	0	0	2	2	3	1	2	0	2	0	2	2							2	1.4	1.5	1
1	7630	11.09.2007 5:49 PM	claudia eberhardt	Bernese Mountain Dog	2	1	6	2	0	3	4	2	3	3	3	2	2	0	2	2							1.6	2	1.25	2
1	2452	09.23.2007 9:32 PM	Cleo	Bernese Mountain Dog	2	1	1.1	2	0	2	2	2	2	2	2	0	1	2	2	1							1.8	1.4	2	1.67
1	10904	12.06.2007 2:26 PM	Dali vom schwarzen Gold	Bernese Mountain Dog	2	1	2	1	0	0	2	2	2	2	2	1	1	3	2	2							2	1.8	1.75	1.33
1	10489	12.03.2007 4:17 PM	donna	Bernese Mountain Dog	2	1	10	2	0	0	2	2	3	4	3	0	1	1	1	1							1.8	0.8	1	1.33
2	79890	11.11.2008 11:09 AM	Doro	Bernese Mountain Dog	2	1	3	2	1	2	2	2	3	4	3	0	2	1			1	1	2	1	1	0					0.67
1	951	09.11.2007 3:01 PM	Dunja	Bernese Mountain Dog	2	1	2	2	1	0	2	2	2	2	2	0	2	2	1	1							1.8	0.4	2	0.67
2	63004	08.21.2008 10:46 PM	Eddie	Bernese Mountain Dog	2	1	3	1	1	2	2	2	3	2	3	2	1	2			1	1	2	1	1	0					0.67
1	10279	12.02.2007 9:44 AM	Eddy	Bernese Mountain Dog	2	1	3	1	0	0	2	2	3	3	3	0	1	1	1	2							1.4	0.4	2	0
2	59227	08.04.2008 12:44 PM	Edison	Bernese Mountain Dog	2	1	0.3	1	0	0	2	2	2	4	3	0	1	1			0	2	2	2	1	1					0.67
1	680	09.07.2007 1:02 PM	Edy	Bernese Mountain Dog	2	1	3.5	1	1	0	3	2	3	4	2	0	2	3	1	2							1.8	1	1.5	1.67
1	7468	11.08.2007 10:57 AM	ELVI	Bernese Mountain Dog	2	1	5	2	1	0	3	2	3	2	3	0	2	3	2	1							0.2	1	1	1.67
1	3662	10.05.2007 9:13 PM	Emma	Bernese Mountain Dog	2	1	3	2	0	1	2	2	3	1	2	1	2	0	2	2							1	1.4	1.75	2
2	66583	09.09.2008 5:22 PM	emmi	Bernese Mountain Dog	2	1	0.2	2	0	3	2	2	3	3	2	0	2	0			0	2	1	1	1	0					0.58
2	53065	07.06.2008 6:59 AM	Engelchen	Bernese Mountain Dog	2	1	7	1	1	0	2	2	2	4	2	1	2	3			0	1	3	2	1	1					0.17
2	54139	07.10.2008 5:07 PM	Fiete	Bernese Mountain Dog	2	1	6	1	0	3	2	2	3	2	1	1	2	3			0	2	2	1	1	0					0.25
1	3106	09.30.2007 8:52 PM	haika	Bernese Mountain Dog	2	1	0.3	2	0	1	2	2	3	1	3	0	1	0	1	2							0.8	1.6	0.5	1.67
1	1238	09.13.2007 9:49 PM	hayka	Bernese Mountain Dog	2	1	4	2	1	0	2	2	3	2	3	0	1	3	1	2							2	1.8	1.5	0.67
1	6975	11.03.2007 6:35 PM	Holly	Bernese Mountain Dog	2	1	0.4	2	0	2	2	2	3	2	1	0	1	1	2	2							0.6	2	2	0.67
1	13299	01.01.2008 8:33 PM	Ilka	Bernese Mountain Dog	2	1	2	2	0	0	4	2	1	1	3	0	2	2	1	2							1.4	1.6	1.75	1
1	5327	10.21.2007 7:52 PM	jambo	Bernese Mountain Dog	2	1	2	1	0	0	2	2	3	3	3	0	2	3	1	1							1	2	2	1.67
1	4058	10.09.2007 10:56 PM	Jana	Bernese Mountain Dog	2	1	5	2	1	0	2	2	1	4	2	0	2	3	2	2							1	1.6	1.5	1.67
2	91263	12.30.2008 3:20 PM	Jette	Bernese Mountain Dog	2	1	0.2	2	0	0	2	2	2	4	2	0	2	0			0	2	2	2	1	0					0.58
1	9208	11.24.2007 6:36 PM	Jonas	Bernese Mountain Dog	2	1	1	1	0	3	2	2	3	2	3	1	1	0	2	2							0.2	1.8	0.75	1
1	13016	12.29.2007 7:43 PM	Jupp	Bernese Mountain Dog	2	1	1	1	0	0	2	2	3	1	2	0	1	2	2	2							1.4	1.4	2	2
2	68385	09.18.2008 4:38 PM	Kalle	Bernese Mountain Dog	2	1	0.5	1	0	2	3	2	3	1	3	2	1	0			0	3	2	1	1	0					0.5
1	3205	10.01.2007 9:15 PM	Kaya	Bernese Mountain Dog	2	1	6	2	0	0	2	2	3	4	3	0	1	0	1	1							0.4	1.2	1	1
2	66446	09.08.2008 6:19 PM	kessy	Bernese Mountain Dog	2	1	2	2	0	0	2	2	3	2	3	0	1	2			1	2	2	1	0	0					0.5
1	12657	12.25.2007 1:10 PM	kim	Bernese Mountain Dog	2	1	2	2	0	0	2	2	3	1	3	1	2	0	2	2							1.6	1.8	1.75	1.33
1	12370	12.20.2007 8:36 AM	Klara	Bernese Mountain Dog	2	1	1.3	2	0	0	2	2	3	3	3	0	1	0	2	2							1.6	1.4	2	2
1	9946	11.29.2007 5:39 PM	laika	Bernese Mountain Dog	2	1	5	2	0	3	2	2	3	2	3	2	3	1	1	2							1	1.6	2	1.33
2	59848	08.07.2008 1:19 PM	Lando	Bernese Mountain Dog	2	1	5	1	0	3	2	2	3	3	2	1	2	0			0	1	3	1	1	0					0.33
2	76578	10.26.2008 12:58 AM	lennox	Bernese Mountain Dog	2	1	0.25	1	0	3	2	1	3	1	3	1	1	0			0	1	1	2	1	0					1
1	652	09.06.2007 7:35 PM	Lizzy	Bernese Mountain Dog	2	1	6.5	2	1	0	2	2	3	3	1	0	2	3	2	2							2	1.6	1.5	2
1	1457	09.16.2007 12:35 AM	Lobo	Bernese Mountain Dog	2	1	8	1	1	2	2	1	3	2	3	0	1	2	1	2							1.8	1.4	1.75	0.67
1	1399	09.15.2007 2:31 PM	Lucky	Bernese Mountain Dog	2	1	4	1	1	3	4	2	3	2	3	2	1	2	2	2							0.6	1.8	0.75	1.67
1	5731	10.24.2007 9:16 PM	luna	Bernese Mountain Dog	2	1	0.5	2	0	0	2	2	1	2	3	2	1	1	2	1							1.8	1.4	2	1.67
1	11100	12.07.2007 7:53 PM	M;unlop	Bernese Mountain Dog	2	1	3	1	1	0	3	2	1	2	3	0	2	3	2	1							1.6	1.6	2	1
2	64572	08.29.2008 10:31 AM	Maggie	Bernese Mountain Dog	2	1	0.75	2	0	1	2	1	3	3	3	0	1	1			0	2	1	1	1	0					1.33
2	92193	01.05.2009 3:00 PM	Marek	Bernese Mountain Dog	2	1	6	1	1	1	3	2	3	4	2	0	3	2			0	2	2	1	0	0					0.25
2	81204	11.15.2008 3:44 PM	Mariechen	Bernese Mountain Dog	2	1	7	2	0	2	4	1	4	3	2	0	1	1			0	1	2	1	1	0					0.83
1	13345	01.02.2008 3:30 PM	Martina	Bernese Mountain Dog	2	1	6	1	0	3	2	2	3	3	3	2	2	3	2	2							1	1.8	2	2
2	78388	11.04.2008 10:27 AM	Mauro	Bernese Mountain Dog	2	1	1.7	1	0	3	2	2	3	2	3	0	1	3			0	2	2	2	0	0					0.75
2	82585	11.20.2008 6:54 PM	Maximilian	Bernese Mountain Dog	2	1	1	1	0	3	2	2	3	3	3	2	1	1			1	2	2	2	1	0					1
2	53486	07.08.2008 12:37 PM	Merlin	Bernese Mountain Dog	2	1	7.5	1	0	0	2	2	3	4	3	0	1	3			1	1	2	1	1	0					0.67
1	11188	12.08.2007 3:04 PM	Mira	Bernese Mountain Dog	2	1	3	2	0	1	4	2	3	2	3	1	2	0	2	2							2	0	2	2
2	60626	08.11.2008 10:47 PM	mira	Bernese Mountain Dog	2	1	6	2	0	0	2	2	2	2	3	0	1	1			1	2	1	1	1	0					0.67
2	63423	08.24.2008 6:55 AM	Müller	Bernese Mountain Dog	2	1	0.3	1	0	1	3	1	3	1	2	0	2	1			0	2	2	2	1	0					0.58
2	58032	07.29.2008 3:35 PM	nelsi	Bernese Mountain Dog	2	1	3	1	0	3	3	1	3	4	2	0	2	0			0	2	2	1	0	0					0.58
1	2232	09.21.2007 8:43 AM	Nemo	Bernese Mountain Dog	2	1	4	1	0	0	4	1	3	3	1	0	1	0	2	2							0	0.6	2	0
2	71641	10.05.2008 4:32 PM	nero	Bernese Mountain Dog	2	1	5	1	1	0	3	2	3	2	3	0	2	2			1	2	2	2	1	0					0.42
2	57045	07.23.2008 10:27 PM	Paco	Bernese Mountain Dog	2	1	6	1	1	0	4	2	2	3	2	1	2	0			0	2	2	1	1	0					0.67
2	64862	08.31.2008 8:32 PM	paula	Bernese Mountain Dog	2	1	0.1	2	0	1	2	2	3	1	3	0	1	2			0	1	2	1	1	0					0.75
2	90796	12.27.2008 6:24 PM	Paula	Bernese Mountain Dog	2	1	7	2	1	0	2	2	3	1	2	0	2	3			0	1	3	1	1	1					0.25
1	7496	11.08.2007 2:37 PM	Pauline	Bernese Mountain Dog	2	1	3	2	0	0	2	2	3	2	2	2	1	2	2	1							1.4	1.4	1.75	1.33
1	12606	12.24.2007 12:27 AM	richard	Bernese Mountain Dog	2	1	1.5	1	0	3	2	2	3	2	3	0	2	0	2	2							2	2	1.75	2
1	1627	09.17.2007 6:24 PM	Rico	Bernese Mountain Dog	2	1	5	1	1	0	2	2	3	3	2	0	2	0	2	2							1.4	1.8	2	1.67
2	60746	08.12.2008 2:29 PM	Rico	Bernese Mountain Dog	2	1	2	1	0	0	3	1	3	3	2	0	2	2			0	1	3	2	1	1					0.33
2	92145	01.05.2009 10:05 AM	robin	Bernese Mountain Dog	2	1	7	1	0	0	2	2	1	1	3	0	1	3			1	1	2	2	1	1					0.08
1	10041	11.30.2007 12:16 PM	Ronja	Bernese Mountain Dog	2	1	7	2	1	1	4	2	3	4	2	0	1	1	1	2							0.4	1.4	2	0.33
2	59931	08.07.2008 9:08 PM	Sally	Bernese Mountain Dog	2	1	5	2	1	2	3	2	3	4	2	0	1	3			0	1	2	1	1	0					0.67
1	10088	11.30.2007 7:54 PM	SAM	Bernese Mountain Dog	2	1	10	1	0	3	2	1	3	4	3	1	2	3	2	2							2	2	1.5	2
2	55907	07.19.2008 2:54 PM	sam	Bernese Mountain Dog	2	1	0.25	1	0	3	2	2	2	2	3	0	2	0			1	1	2	1	1	0					1.25
1	1504	09.16.2007 5:06 PM	Samson	Bernese Mountain Dog	2	1	2.5	1	0	2	2	2	3	2	3	0	2	2	1	1							2	1.6	0.5	2
1	10222	12.01.2007 8:22 PM	Sandy	Bernese Mountain Dog	2	1	1.5	2	0	0	2	2	2	1	3	1	2	0	1	2							1	1.2	1.75	1
2	54639	07.13.2008 7:33 PM	Sep	Bernese Mountain Dog	2	1	2	1	0	0	2	2	2	4	2	0	2	2			0	2	2	1	1	1					0.5
1	9765	11.28.2007 2:23 PM	shila	Bernese Mountain Dog	2	1	0.2	2	0	1	2	2	1	2	3	0	1	0	2	2							1	1	1	1.67
1	5459	10.22.2007 8:32 PM	Shiva	Bernese Mountain Dog	2	1	2	2	0	0	2	2	3	4	2	0	1	1	2	2							1.8	2	2	1.33
1	7795	11.11.2007 3:29 PM	Shorty	Bernese Mountain Dog	2	1	0.3	1	0	3	2	1	3	1	2	0	1	0	2	2							2	1.8	2	0.67
1	12244	12.18.2007 5:57 PM	Sina	Bernese Mountain Dog	2	1	1	2	0	0	2	2	3	3	3	0	1	1	1	2							0.8	1.8	2	2
1	9189	11.24.2007 4:29 PM	Stella	Bernese Mountain Dog	2	1	0.7	2	0	1	2	2	3	3	3	1	1	1	1	2							1.4	1.6	1.5	2
1	8388	11.17.2007 2:26 PM	Teddy	Bernese Mountain Dog	2	1	0.8	1	0	2	2	2	1	2	3	0	2	3	2	2							1.2	1.6	2	1.33
2	53339	07.07.2008 8:23 PM	W?rmchen	Bernese Mountain Dog	2	1	6	2	0	0	2	2	3	2	2	0	1	3			0	1	2	1	1	0					0.25
1	13446	01.03.2008 2:02 PM	Wotan	Bernese Mountain Dog	2	1	18	1	0	3	4	2	3	3	3	2	1	0	2	2							1.6	2	2	1.67
2	70218	09.28.2008 7:39 PM	alf	Bichon Frise	9	1	9	1	0	0	3	2	3	1	3	2	1	2			0	1	2	2	1	1					0.5
1	7023	11.04.2007 5:40 AM	ang	Bichon Frise	9	1	2	2	0	0	4	2	3	1	2	0	1	1	1	2							1.2	1.8	2	1.33
1	1418	09.15.2007 4:55 PM	Benny	Bichon Frise	9	1	4	1	0	2	2	2	3	1	1	2	3	1	2	2							1	1.8	1.25	2
1	10801	12.05.2007 6:56 PM	Billy	Bichon Frise	9	1	1	1	0	0	2	2	3	3	2	0	1	0	1	2							1.8	2	2	2
2	54553	07.13.2008 12:24 AM	caralina	Bichon Frise	9	1	1.7	2	1	2	2	2	3	4	2	1	2	2			0	2	2	1	1	1					0.58
2	94956	01.18.2009 2:59 PM	charly	Bichon Frise	9	1	1	1	0	0	3	2	3	2	2	0	2	0			0	2	2	2	1	0					1.25
1	13505	01.03.2008 10:36 PM	Fin	Bichon Frise	9	1	0.3	1	0	0	2	1	3	2	3	0	1	0	2	1							1.6	0.6	1.75	1.33
1	8670	11.19.2007 10:46 PM	Gini	Bichon Frise	9	1	1	2	0	0	3	2	2	3	2	0	2	0	1	1							1.8	1.6	1.5	1.67
1	2643	09.25.2007 7:04 PM	gino	Bichon Frise	9	1	0.7	1	0	1	3	2	3	2	3	1	1	0	2	2							0.2	0.2	1.5	0
2	62205	08.18.2008 6:39 PM	gito	Bichon Frise	9	1	4	1	1	0	3	2	3	3	3	0	1	2			0	1	2	1	0	1					0.58
2	80724	11.14.2008 10:37 AM	herkules	Bichon Frise	9	1	5	1	0	3	2	1	4	1	2	0	1	0			0	1	2	2	0	0					1.42
2	75164	10.18.2008 4:22 PM	Kn?pfchen	Bichon Frise	9	1	1.75	1	0	0	3	1	3	3	2	0	1	0			0	1	2	1	1	0					1.17
1	3370	10.03.2007 1:43 PM	knöpfche	Bichon Frise	9	1	0.7	1	0	0	3	2	3	3	3	0	1	0	2	2							1.6	2	1.5	1
1	10080	11.30.2007 7:17 PM	Kyra	Bichon Frise	9	1	1.4	2	0	2	2	2	3	1	2	0	1	1	2	2							1	1.6	1.5	1.67
2	67459	09.14.2008 11:26 AM	Louis	Bichon Frise	9	1	6	1	1	0	3	2	3	1	3	0	1	3			0	1	2	1	1	0					1.17
2	92035	01.04.2009 3:54 PM	Louis	Bichon Frise	9	1	6.9	1	1	0	3	2	3	1	3	0	1	1			0	1	2	1	1	0					0.92
2	53726	07.09.2008 8:23 AM	Maja	Bichon Frise	9	1	3	2	0	0	2	2	3	2	2	1	1	2			0	1	2	1	1	1					1.08
1	2074	09.20.2007 8:42 AM	Mero	Bichon Frise	9	1	5	1	1	0	4	2	2	3	1	1	2	2	1	1							0.4	1.8	1	2
1	9394	11.25.2007 10:17 PM	Müller	Bichon Frise	9	1	6.3	2	1	1	4	2	4	3	2	0	1	2	2	2							2	1.4	1.75	2
3	6944	11.03.2007 4:03 PM	Rosalie	Bichon Frise	9	1	0.6	2	0	0	2	2	3	4	2	0	1	2	2	2	0	1	2	2	1	1	0.8	1.2	1.75	0.67	0.75
2	75750	10.21.2008 4:12 PM	Samira	Bichon Frise	9	1	5	2	0	1	4	2	2	3	2	0	1	0			0	1	2	2	1	1					0.75
2	55929	07.19.2008 5:34 PM	Sunny	Bichon Frise	9	1	7	1	1	0	4	2	1	1	2	0	1	1			1	1	2	1	1	1					0.58
1	11310	12.09.2007 2:36 PM	Tiffy	Bichon Frise	9	1	0.7	2	0	0	2	2	3	3	2	0	2	0	2	2							1.2	1.8	2	2
1	6663	11.01.2007 6:17 AM	whitney	Bichon Frise	9	1	3	2	0	3	3	2	3	1	3	2	2	0	2	2							1.6	2	2	2
1	13652	01.05.2008 2:49 PM	ally	Biewer Terrier	3	1	2	2	1	0	2	2	3	2	2	0	1	0	2	2							0.8	1.6	1.75	1.33
2	95531	01.21.2009 10:53 PM	Bruno	Biewer Terrier	3	1	0.6	1	0	0	2	1	3	2	3	0	1	0			1	1	2	2	1	1					0.58
1	1965	09.19.2007 6:12 PM	Dyra	Biewer Terrier	3	1	0.5	2	0	1	3	2	2	4	2	0	1	0	2	2							1.6	1.8	2	2
1	8368	11.17.2007 11:20 AM	Eddie	Biewer Terrier	3	1	0.3	1	0	0	2	1	2	1	2	0	1	0	2	2							0.8	1.2	2	1.33
2	94363	01.15.2009 7:14 PM	Fuchur	Biewer Terrier	3	1	0.5	1	0	1	3	2	2	3	2	0	1	1			0	1	2	2	1	0					0.25
1	12048	12.16.2007 3:21 PM	gene	Biewer Terrier	3	1	0.6	1	1	0	3	2	1	1	3	0	1	1	1	2							1.4	1.6	1.5	1
2	73303	10.11.2008 12:19 PM	Gigi	Biewer Terrier	3	1	4	1	1	2	3	2	3	2	3	0	1	0			0	1	1	1	1	1					0.75
1	4074	10.10.2007 10:35 AM	Jeannie	Biewer Terrier	3	1	2.5	2	1	3	2	2	3	2	2	0	1	1	2	2							1	2	2	1.33
1	2373	09.22.2007 8:49 PM	Julie	Biewer Terrier	3	1	4	2	0	3	2	2	3	2	3	0	1	1	1	1							1.2	1.2	1	2
1	3049	09.30.2007 12:13 PM	Keiko	Biewer Terrier	3	1	3	1	0	0	2	2	2	3	3	0	1	0	2	2							0.2	0.8	0.75	1.33
1	9934	11.29.2007 4:43 PM	Kimba	Biewer Terrier	3	1	3	2	1	1	2	1	3	1	2	2	2	0	2	2							0.6	0.8	0.25	1.67
2	69403	09.24.2008 7:38 AM	Lucky	Biewer Terrier	3	1	0.8	1	0	0	2	2	3	2	3	0	1	2			1	2	3	2	1	0					0.42
2	93569	01.13.2009 11:19 AM	Paul	Biewer Terrier	3	1	2	1	0	0	2	1	3	1	2	0	1	0			0	1	2	1	1	1					1.25
2	94143	01.15.2009 8:50 AM	Tobi	Biewer Terrier	3	1	0.5	1	0	2	3	2	3	2	3	0	2	2			0	1	2	2	1	0					0.83
1	8709	11.20.2007 12:15 PM	Tyson	Biewer Terrier	3	1	0.3	1	0	1	2	2	3	1	2	0	2	0	2	2							0.6	1.2	1.75	1.67
1	10136	12.01.2007 10:39 AM	Butges	Blue Gascony Basset	6	1	0.3	1	0	1	2	2	2	3	3	0	1	0	2	2							1	1.6	1.75	2
2	66525	09.09.2008 9:58 AM	Nobel	Blue Gascony Basset	6	1	5	1	0	0	4	1	3	2	3	1	1	3			0	1	2	2	1	0					0.42
2	68185	09.17.2008 5:54 PM	Pauli	Blue Gascony Basset	6	1	5	1	1	0	2	1	3	2	3	0	1	1			1	2	2	1	0	0					0.92
2	60453	08.10.2008 5:12 PM	asima	Boerboel	-	1	2	2	0	1	2	2	3	1	3	1	2	3			0	1	2	1	1	0					0.25
2	60563	08.11.2008 2:36 PM	Bakkies	Boerboel	-	1	4.5	1	0	1	2	2	3	3	3	2	2	3			0	2	2	1	0	0					0.42
2	60733	08.12.2008 1:20 PM	Diego	Boerboel	-	1	1.3	1	0	1	2	2	2	3	2	0	1	2			0	2	2	2	1	0					1.08
2	60344	08.09.2008 10:29 PM	Elsa	Boerboel	-	1	2	2	1	3	2	2	3	2	3	2	1	1			1	1	2	1	0	1					0.5
2	60348	08.09.2008 11:47 PM	Happy	Boerboel	-	1	2	2	1	3	3	2	3	4	2	2	2	2			0	1	2	1	0	1					0.58
2	60909	08.13.2008 1:14 PM	Isis	Boerboel	-	1	3.5	2	1	0	2	2	3	1	2	1	3	2			0	2	2	1	0	0					0.58
2	61207	08.14.2008 1:16 PM	Matze	Boerboel	-	1	1	2	0	3	3	1	2	2	2	1	1	0			0	1	1	1	1	1					0.42
2	60347	08.09.2008 11:25 PM	Michel	Boerboel	-	1	1.5	1	0	2	2	1	3	2	3	1	2	2			1	1	2	1	0	0					0.5
2	63265	08.22.2008 5:56 PM	Murphy	Boerboel	-	1	2.5	1	1	0	2	2	3	3	2	0	2	3			0	1	2	1	1	0					0.58
2	54742	07.14.2008 1:02 PM	Otto	Boerboel	-	1	3	1	0	3	3	2	3	1	3	1	1	0			0	1	2	1	1	1					0.58
1	686	09.07.2007 2:25 PM	Sammy	Boerboel	-	1	4	1	1	1	3	1	1	3	2	0	1	2	2	2							0	1	0.5	1
1	13201	12.31.2007 4:29 PM	ando	Bohemian Shepherd	-	1	4	1	0	0	2	2	3	1	3	0	1	1	2	2							1.6	2	1	2
2	56603	07.22.2008 3:25 PM	Benita	Bolognese	9	1	4	2	1	1	2	2	3	2	2	1	1	3			0	1	2	1	1	0					0.67
1	13194	12.31.2007 3:08 PM	Benji	Bolognese	9	1	1.5	1	0	1	2	2	2	3	3	1	2	0	2	2							2	2	2	2
1	3463	10.04.2007 9:12 AM	Bobby	Bolognese	9	1	4	1	0	1	4	2	2	2	2	1	1	0	1	1							1.6	1.2	1	1.67
2	77014	10.28.2008 11:35 AM	Cookie	Bolognese	9	1	0.7	1	0	0	2	2	3	4	2	0	2	1			0	1	2	2	1	1					0.75
1	11026	12.07.2007 1:37 PM	eddy	Bolognese	9	1	3	1	0	0	4	2	3	3	3	0	1	0	2	2							1	0.6	2	1
2	53181	07.06.2008 9:27 PM	Filou	Bolognese	9	1	4	1	1	0	2	2	3	3	2	0	2	1			0	1	1	1	1	0					1.67
1	8479	11.18.2007 1:55 PM	Flocke	Bolognese	9	1	5	2	0	0	3	2	3	2	3	0	2	0	2	2							1.4	1.4	1.75	1
1	4224	10.11.2007 7:31 PM	Gino	Bolognese	9	1	3	1	0	0	2	2	3	2	2	0	1	0	1	2							2	1.2	2	1.33
2	91879	01.02.2009 11:59 PM	Jago	Bolognese	9	1	8	1	0	0	3	2	3	2	2	1	1	0			0	2	2	1	0	0					0
1	7774	11.11.2007 1:29 PM	janosch	Bolognese	9	1	0.8	1	0	0	2	2	1	1	3	0	1	0	1	2							0.6	1	1.5	1.67
3	161	08.29.2007 9:07 PM	Lilli	Bolognese	9	1	4	2	0	3	2	2	2	2	3	1	2	0	2	2	0	1	2	2	1	1	0.6	1.6	1.5	2	0.58
2	79334	11.07.2008 2:49 PM	lucky	Bolognese	9	1	6	1	1	0	2	2	3	2	1	0	1	1			0	1	1	1	0	0					1.5
1	2836	09.27.2007 6:41 PM	Pepe	Bolognese	9	1	0.3	1	0	1	3	2	2	1	2	0	1	0	2	2							1	1.8	1.5	2
1	10791	12.05.2007 5:56 PM	Alexia of little Heatrbreaker	Bolonka Zwetna	-	1	1.2	2	0	0	2	2	1	1	3	0	2	3	2	1							1.6	2	1.75	2
2	63687	08.25.2008 8:49 PM	Amy	Bolonka Zwetna	-	1	3	2	0	3	2	2	2	2	3	1	1	0			1	2	2	1	1	1					1.08
1	3399	10.03.2007 5:46 PM	Ayko	Bolonka Zwetna	-	1	1.5	1	0	0	2	2	4	2	2	0	1	2	2	2							1.6	1.8	2	2
1	11708	12.12.2007 2:41 PM	balu	Bolonka Zwetna	-	1	1.5	1	0	0	4	2	3	2	3	0	1	1	1	2							0	1	1.75	1.67
1	10877	12.06.2007 11:06 AM	bebo	Bolonka Zwetna	-	1	5	1	0	3	2	1	3	3	3	0	1	0	2	2							2	1.8	1.5	1.67
1	11696	12.12.2007 12:58 PM	Beni	Bolonka Zwetna	-	1	3	1	0	0	2	2	3	4	2	0	1	1	2	2							0.4	1.2	0.25	2
1	8971	11.22.2007 2:07 PM	Berry	Bolonka Zwetna	-	1	2.5	1	1	0	3	2	3	4	2	1	1	3	2	2							2	1.6	1.25	1.33
1	7643	11.09.2007 8:43 PM	bine	Bolonka Zwetna	-	1	5	2	0	1	4	2	4	1	2	0	1	0	2	2							1	1.8	1.75	1
1	11377	12.09.2007 10:17 PM	Bort	Bolonka Zwetna	-	1	3	2	0	0	2	1	3	1	3	2	3	0	1	2							1.6	1.4	1.25	1.67
2	93293	01.11.2009 11:16 AM	Charlie	Bolonka Zwetna	-	1	1.4	1	1	0	2	2	2	3	2	0	2	2			0	1	3	1	0	1					1.17
1	3479	10.04.2007 12:17 PM	Cimba	Bolonka Zwetna	-	1	1	2	1	0	2	2	3	2	2	0	1	1	2	2							0.6	1	1.75	0.33
2	86688	12.10.2008 12:58 PM	Cindy	Bolonka Zwetna	-	1	2	2	1	0	2	2	3	3	3	0	2	2			0	1	2	1	1	1					0.42
2	92164	01.05.2009 12:43 PM	Cody	Bolonka Zwetna	-	1	0.25	1	0	1	2	1	2	2	3	0	1	0			0	2	2	2	1	0					0.75
1	4641	10.15.2007 10:10 PM	Data	Bolonka Zwetna	-	1	6.5	1	0	0	2	1	2	2	2	0	1	1	1	1							0.8	1.6	1.75	1.67
1	874	09.10.2007 6:17 PM	Erik	Bolonka Zwetna	-	1	0.3	1	0	1	2	2	2	3	1	0	2	1	2	2							1.2	1.6	1.75	0.67
1	6690	11.01.2007 11:52 AM	Feli	Bolonka Zwetna	-	1	3	2	1	0	2	2	3	2	1	0	1	0	1	2							2	1	0	2
1	12659	12.25.2007 1:34 PM	Fiby	Bolonka Zwetna	-	1	2	2	0	0	2	1	2	3	3	0	1	0	2	2							0.8	1.6	0.5	2
1	13384	01.02.2008 7:55 PM	Filou	Bolonka Zwetna	-	1	3.5	1	1	1	2	2	3	2	3	0	1	0	1	1							0.6	1.2	1.5	0
1	7322	11.06.2007 4:18 PM	Finn	Bolonka Zwetna	-	1	2.5	1	0	0	2	2	3	2	3	0	1	0	2	2							1.4	1.6	0.75	1.33
1	4286	10.12.2007 2:03 PM	Fino	Bolonka Zwetna	-	1	0.2	1	0	0	2	1	1	1	3	0	1	1	2	1							1	1.8	1.25	1.67
1	10697	12.04.2007 7:53 PM	Flora	Bolonka Zwetna	-	1	0.9	2	1	1	3	1	3	2	2	0	2	1	1	2							1.8	1.4	2	0.67
1	8615	11.19.2007 3:27 PM	Furby	Bolonka Zwetna	-	1	1	1	0	0	2	2	2	3	1	0	2	1	2	2							0.8	1.8	2	2
1	4062	10.10.2007 12:59 AM	Gismo	Bolonka Zwetna	-	1	0.4	1	0	0	2	2	2	1	2	0	1	1	2	2							1.6	1.8	1.25	0.67
1	5401	10.22.2007 1:32 PM	gizmo	Bolonka Zwetna	-	1	1	1	0	0	2	2	2	1	2	0	2	0	2	2							1.4	1.8	1.5	2
1	5182	10.20.2007 11:26 AM	helge	Bolonka Zwetna	-	1	0.2	1	0	2	2	2	3	1	2	0	1	0	1	2							1	1.6	1.75	1.67
2	66311	09.07.2008 7:25 PM	jette	Bolonka Zwetna	-	1	1	2	0	2	2	2	3	2	3	0	2	2			1	1	2	1	1	0					0.75
2	89706	12.20.2008 8:36 PM	Joshi	Bolonka Zwetna	-	1	3	1	1	0	2	2	2	1	2	2	1	1			0	1	2	2	1	1					0.83
1	12079	12.16.2007 7:16 PM	jule	Bolonka Zwetna	-	1	0.9	2	0	0	2	2	2	4	3	0	1	0	2	2							1	1	1.75	2
2	61820	08.15.2008 9:07 PM	Kr?mel	Bolonka Zwetna	-	1	1.75	2	1	0	2	2	3	2	3	0	1	3			1	1	3	2	1	1					0.83
1	7992	11.13.2007 2:40 PM	Krümel	Bolonka Zwetna	-	1	0.7	1	0	0	3	2	3	3	2	0	1	1	2	2							0.8	1.6	1.5	1.67
1	6587	10.31.2007 3:22 PM	Largo	Bolonka Zwetna	-	1	4	1	0	0	2	2	3	4	3	0	1	1	2	2							0.4	1.6	1.25	1.33
2	91827	01.02.2009 4:50 PM	Lewis	Bolonka Zwetna	-	1	0.8	1	0	0	2	2	2	2	2	0	1	2			0	1	2	2	1	0					0.67
1	1508	09.16.2007 5:57 PM	Lillie	Bolonka Zwetna	-	1	1.5	2	0	0	2	2	3	3	2	0	1	3	2	2							1.2	1.8	2	1
1	6458	10.30.2007 3:24 PM	Loki	Bolonka Zwetna	-	1	0.8	1	0	1	3	2	1	2	2	1	2	0	1	2							1.4	1.4	1.75	1.67
1	13943	01.07.2008 10:12 PM	Lola	Bolonka Zwetna	-	1	3	2	0	0	2	2	2	2	2	1	2	0	2	2							1.6	1.6	1.5	1.33
1	886	09.10.2007 7:34 PM	Luna	Bolonka Zwetna	-	1	0.6	2	0	1	2	1	3	1	2	0	2	1	2	2							1	1.4	1.25	1.67
2	60725	08.12.2008 12:21 PM	luzie	Bolonka Zwetna	-	1	0.5	2	0	0	2	2	3	2	2	0	2	1			0	1	2	2	1	0					0.42
2	70544	09.30.2008 6:37 AM	Meggy	Bolonka Zwetna	-	1	0.8	1	0	1	2	2	3	2	2	1	1	2			0	2	3	2	1	1					0.08
1	9722	11.28.2007 10:15 AM	Meiki	Bolonka Zwetna	-	1	3	1	0	1	3	2	3	3	3	0	3	1	2	1							1.2	0.8	1.75	1
1	2336	09.22.2007 12:23 PM	Meisie	Bolonka Zwetna	-	1	0.3	2	0	3	2	2	3	3	3	0	1	1	2	2							0.4	1.2	1.5	1.67
1	6203	10.28.2007 1:51 PM	Mischa	Bolonka Zwetna	-	1	0.9	1	0	0	2	2	3	1	3	0	1	0	1	1							1.6	1.6	2	1.33
2	66332	09.07.2008 11:16 PM	Monty	Bolonka Zwetna	-	1	3	1	0	3	2	2	3	3	2	0	1	3			0	1	2	1	1	0					0.67
2	64787	08.31.2008 9:51 AM	murphy	Bolonka Zwetna	-	1	0.5	1	0	2	3	2	3	1	2	1	2	1			0	1	2	2	1	1					0.92
1	1592	09.17.2007 2:13 PM	Nanni	Bolonka Zwetna	-	1	1	2	0	3	1	2	3	3	3	2	2	0	2	2							0.8	1	2	0.33
2	79506	11.09.2008 5:16 PM	nelly	Bolonka Zwetna	-	1	7	2	0	1	3	1	4	4	2	0	1	0			0	1	2	1	0	1					0.42
2	77226	10.29.2008 11:42 AM	Paco	Bolonka Zwetna	-	1	2	1	0	0	3	2	3	2	1	0	1	1			0	1	2	2	1	1					1.42
1	6087	10.27.2007 2:21 PM	Paul	Bolonka Zwetna	-	1	3	1	0	0	2	2	3	2	3	0	1	2	1	2							0.2	0.8	0.25	0.67
1	6625	10.31.2007 7:01 PM	Pia Zadora	Bolonka Zwetna	-	1	4	1	0	0	3	1	3	3	3	0	1	0	2	2							1.2	1.4	1.25	1.67
1	6824	11.02.2007 1:40 PM	ronja	Bolonka Zwetna	-	1	0.2	2	0	0	2	2	2	1	1	0	1	0	2	2							0.8	1.8	0.75	1.67
2	82087	11.18.2008 4:08 PM	Sam	Bolonka Zwetna	-	1	1.6	1	0	0	2	2	3	1	3	0	1	1			1	1	2	2	1	0					0.83
1	1739	09.18.2007 3:47 PM	spiky	Bolonka Zwetna	-	1	0.8	1	0	3	2	2	3	2	3	0	1	0	2	2							0.8	1.6	0.5	2
1	9678	11.27.2007 8:51 PM	Stella	Bolonka Zwetna	-	1	0.5	2	0	0	2	2	2	2	3	0	1	0	2	2							1	1.4	1.75	2
2	70486	09.29.2008 8:21 PM	Timmy	Bolonka Zwetna	-	1	0.2	1	0	0	2	1	1	2	3	0	1	0			1	2	2	2	1	0					0.75
1	2935	09.28.2007 8:21 PM	Tweety	Bolonka Zwetna	-	1	2.5	1	0	1	2	2	2	2	2	0	1	1	2	2							1.2	1	1.5	2
1	5885	10.25.2007 8:27 PM	victor	Bolonka Zwetna	-	1	0.7	1	0	1	3	2	3	3	2	0	1	0	2	2							1.6	1.8	2	1.67
1	2299	09.21.2007 8:49 PM	Willow und Buffy	Bolonka Zwetna	-	1	1	2	1	3	2	2	2	2	2	2	2	2	2	2							2	2	2	1.67
1	12395	12.20.2007 1:40 PM	Aiden	Border Collie	1	1	2	1	0	1	2	2	3	3	2	2	1	3	2	1							1.4	1.8	2	2
2	73473	10.12.2008 3:41 PM	Amy	Border Collie	1	1	2	2	1	0	3	2	2	2	3	2	2	0			0	2	1	1	0	0					0.83
2	64726	08.30.2008 6:00 PM	Angi	Border Collie	1	1	10	2	0	0	3	2	3	4	3	2	2	3			0	1	2	1	0	0					0.33
2	95225	01.19.2009 9:04 PM	Balou	Border Collie	1	1	2	1	0	0	2	2	3	2	3	0	1	0			1	1	2	1	1	0					0.5
2	75030	10.17.2008 6:32 PM	Balou	Border Collie	1	1	3	1	1	0	2	2	1	1	3	0	1	0			0	1	2	2	1	1					0.75
1	9950	11.29.2007 6:23 PM	Bello	Border Collie	1	1	3	2	0	3	2	1	1	2	3	1	2	0	2	2							1.2	1.8	1.75	2
1	7400	11.07.2007 2:33 PM	Ben	Border Collie	1	1	3.5	1	0	0	2	2	2	3	2	0	2	0	2	1							0.2	1.4	0.5	1.33
2	75565	10.20.2008 5:00 PM	benni	Border Collie	1	1	1	1	0	1	2	2	1	2	2	0	1	1			1	2	2	2	1	1					1.42
1	4978	10.18.2007 8:59 PM	berry	Border Collie	1	1	2.5	1	1	0	2	2	2	2	3	2	2	3	2	1							1.6	1.6	0.75	1.67
1	9952	11.29.2007 6:27 PM	Bonny	Border Collie	1	1	3	2	0	3	2	1	1	1	3	1	2	0	2	2							1.4	1.8	1.75	1.33
2	55361	07.16.2008 10:59 PM	Button	Border Collie	1	1	1.2	1	0	0	2	1	2	3	2	1	3	3			0	1	2	1	1	0					0.5
1	4979	10.18.2007 9:02 PM	Caper	Border Collie	1	1	1.2	1	0	0	2	2	3	4	1	0	3	0	2	2							1.2	2	1.5	2
1	8253	11.16.2007 11:41 AM	Carlos	Border Collie	1	1	0.3	1	0	1	2	2	3	2	1	0	2	0	1	2							1.2	1.6	2	1.33
1	6491	10.30.2007 7:06 PM	Caruso	Border Collie	1	1	3	1	1	1	4	2	2	2	2	0	2	2	1	1							1.4	1.4	2	2
1	6461	10.30.2007 3:28 PM	Chiara	Border Collie	1	1	0.4	2	0	0	2	2	2	2	2	0	2	1	1	2							1.2	1.6	1.5	2
2	74283	10.15.2008 6:28 PM	Chili	Border Collie	1	1	0.5	2	0	2	2	1	2	3	2	0	2	0			0	2	1	1	1	0					0.58
1	5608	10.23.2007 9:59 PM	Clever	Border Collie	1	1	7	1	0	0	4	2	2	3	2	0	2	2	2	1							1.8	2	1.5	1.67
2	56311	07.22.2008 9:19 AM	clooney	Border Collie	1	1	1	1	0	0	2	2	3	2	3	0	1	2			1	1	2	2	0	1					0.67
1	5036	10.19.2007 7:56 AM	Cloud	Border Collie	1	1	2	2	0	2	2	2	2	4	2	2	2	2	2	2							0.8	1.8	0.75	2
2	59486	08.05.2008 8:12 PM	Coffee	Border Collie	1	1	2	2	1	3	2	2	3	2	2	2	2	3			0	1	2	1	1	0					0.25
2	53885	07.09.2008 5:22 PM	Cooper	Border Collie	1	1	0.8	1	0	1	2	1	3	3	2	0	2	0			0	1	2	1	1	0					0.5
2	70362	09.29.2008 3:18 PM	Cooper	Border Collie	1	1	2	1	0	0	2	2	2	1	2	0	3	3			0	2	2	2	1	1					0.25
1	9368	11.25.2007 8:28 PM	Diego	Border Collie	1	1	1.5	1	0	0	2	2	3	1	3	0	1	2	2	2							1.2	2	1.75	2
1	8412	11.17.2007 6:26 PM	Ellis	Border Collie	1	1	9	2	0	0	2	2	3	2	2	1	2	3	2	2							2	2	1.5	1.67
1	5636	10.24.2007 9:19 AM	Emma	Border Collie	1	1	6	2	1	3	4	1	3	3	2	2	2	0	2	2							1.8	1.4	1.75	1.67
2	77363	10.29.2008 8:06 PM	Eyra	Border Collie	1	1	3	2	0	2	2	2	3	2	3	1	2	1			1	1	3	1	0	0					0.5
2	67043	09.11.2008 7:24 PM	fey	Border Collie	1	1	2	2	0	2	3	2	3	1	3	0	3	0			1	1	2	1	1	0					0.33
2	63491	08.24.2008 7:17 PM	Filou	Border Collie	1	1	2	1	1	1	2	2	1	2	3	1	2	3			1	2	3	1	0	0					0.08
2	92043	01.04.2009 4:57 PM	FINN	Border Collie	1	1	1.25	1	0	1	2	2	3	2	3	0	1	3			0	1	2	1	0	0					0.58
1	8319	11.16.2007 8:13 PM	Flash	Border Collie	1	1	2	1	0	1	2	2	2	2	1	0	2	3	2	2							1.2	1.8	1.25	1.67
2	59569	08.06.2008 11:42 AM	Flocki	Border Collie	1	1	1	1	1	1	3	1	3	2	2	0	3	3			0	3	3	2	1	0					0.58
1	11128	12.07.2007 9:51 PM	Fly	Border Collie	1	1	0.3	2	0	2	2	2	3	3	3	0	2	1	2	2							1.2	1.4	2	1.67
2	88144	12.15.2008 7:41 PM	Fly	Border Collie	1	1	2	2	1	3	2	2	3	2	3	1	2	3			0	1	2	1	1	0					0.25
1	13532	01.04.2008 12:35 PM	Fritzi	Border Collie	1	1	2	1	0	2	2	2	1	2	3	2	2	3	2	2							1.6	2	1.5	1.67
1	10886	12.06.2007 12:11 PM	Fynn	Border Collie	1	1	0.3	1	0	0	2	1	3	2	2	0	2	1	2	2							1.4	1.8	1.75	1.67
1	6186	10.28.2007 12:15 PM	Hamlet	Border Collie	1	1	1.9	1	0	3	2	1	3	2	3	0	2	2	1	2							0.6	1.8	1	0
1	8621	11.19.2007 4:09 PM	Higgins	Border Collie	1	1	8	1	1	1	2	2	3	2	2	2	2	3	1	2							0	2	0.25	1
1	13535	01.04.2008 12:48 PM	Iska	Border Collie	1	1	10	2	1	0	2	2	3	2	3	0	2	3	1	2							0.4	1.8	1	0.67
1	6361	10.29.2007 9:56 PM	Jack	Border Collie	1	1	2.5	1	0	0	3	1	2	3	3	2	2	0	1	1							0.8	2	1	1.33
1	2600	09.25.2007 1:38 PM	Jack	Border Collie	1	1	8	1	0	0	3	1	3	2	3	0	2	0	2	2							1.6	2	0	2
2	88046	12.15.2008 2:27 PM	jack	Border Collie	1	1	8	1	1	3	4	2	3	3	2	1	1	0			0	1	2	1	1	0					0.5
2	70464	09.29.2008 5:40 PM	Jacky	Border Collie	1	1	0.6	2	0	0	3	2	2	3	3	1	1	0			0	2	2	2	1	1					1.5
2	91560	01.01.2009 6:03 PM	Jim	Border Collie	1	1	7	2	0	3	2	2	3	2	3	2	2	1			0	2	1	1	0	0					0.17
2	53077	07.06.2008 8:15 AM	jimmy	Border Collie	1	1	1	1	0	0	3	2	3	2	3	0	2	0			1	1	3	2	1	0					0.5
1	6918	11.03.2007 1:50 PM	Joenny	Border Collie	1	1	4	1	1	1	4	2	1	3	2	2	2	3	2	2							1.2	2	0.25	2
1	1224	09.13.2007 7:14 PM	Josie	Border Collie	1	1	3	2	1	3	2	2	3	1	3	0	2	3	2	1							1	1.8	1	0.67
1	1733	09.18.2007 3:09 PM	Joy	Border Collie	1	1	3	2	0	1	2	2	3	2	3	2	2	2	2	2							1.8	1.6	1.5	0.67
1	5108	10.19.2007 4:49 PM	Jule	Border Collie	1	1	0.9	2	0	2	2	2	2	2	3	0	1	1	2	2							1	1.6	1.75	2
1	4984	10.18.2007 9:23 PM	Keena	Border Collie	1	1	2	2	0	0	2	2	2	2	2	0	1	2	1	2							1.2	1.8	0.25	2
1	9147	11.23.2007 11:45 PM	Kimi	Border Collie	1	1	2.5	1	0	1	2	1	3	1	2	1	3	3	1	2							2	1.8	2	2
1	5677	10.24.2007 4:11 PM	kira	Border Collie	1	1	0.3	2	0	2	3	1	3	2	3	1	1	0	2	2							1.6	2	2	2
1	8869	11.21.2007 4:30 PM	Kira	Border Collie	1	1	7	2	0	1	4	2	2	2	3	1	1	0	1	2							1.2	1.4	1.25	0.33
1	3064	09.30.2007 3:26 PM	Kiss	Border Collie	1	1	1.5	2	1	3	2	2	3	2	2	0	1	0	2	2							1.6	1.4	2	2
2	95573	01.22.2009 11:28 AM	Kiss in the Dark	Border Collie	1	1	2	2	0	3	3	2	3	2	3	0	3	3			1	1	2	1	0	1					0.67
2	75888	10.22.2008 11:50 AM	kurley	Border Collie	1	1	5	2	0	0	4	1	3	3	3	0	1	2			1	1	3	2	0	0					0.17
1	833	09.10.2007 9:37 AM	lara	Border Collie	1	1	2	2	0	2	2	2	3	2	1	2	2	3	2	2							1.2	1.8	1.75	1.33
1	3756	10.07.2007 12:34 AM	Lehmann	Border Collie	1	1	4	1	1	0	2	1	3	1	1	0	2	2	2	2							0	1.8	0.25	1
1	13051	12.30.2007 12:28 AM	Leon	Border Collie	1	1	8	1	0	0	4	1	2	2	2	1	2	1	1	2							0.6	1.8	0.5	2
1	5466	10.22.2007 9:12 PM	Lina	Border Collie	1	1	8	2	0	1	1	2	2	2	2	0	2	3	2	2							1.2	2	1.5	1.67
2	60567	08.11.2008 2:56 PM	Lucky	Border Collie	1	1	1	1	0	0	2	1	2	2	2	0	2	3			0	1	3	2	0	1					1.25
1	7201	11.05.2007 3:35 PM	Luke	Border Collie	1	1	9.5	1	1	0	2	2	2	3	2	0	2	1	2	2							1.4	2	1	2
1	10624	12.04.2007 1:52 PM	Luna	Border Collie	1	1	1	2	0	0	2	2	2	4	3	0	2	0	1	2							0.4	1.6	1.5	1.67
1	12454	12.21.2007 10:43 AM	marion	Border Collie	1	1	1.5	1	0	1	3	2	3	1	2	0	2	2	2	2							2	2	2	1.67
1	2538	09.24.2007 8:05 PM	merle	Border Collie	1	1	1.5	2	0	3	2	1	3	1	3	0	2	1	1	1							1.8	1.6	1.75	2
2	80130	11.12.2008 12:11 PM	Merlin	Border Collie	1	1	2	1	0	0	2	2	3	1	2	0	2	3			0	2	2	1	1	1					0.08
2	85434	12.03.2008 10:35 PM	Micky	Border Collie	1	1	1	1	1	3	3	1	3	2	3	0	1	1			1	1	3	2	0	0					1.08
1	1068	09.12.2007 12:43 PM	Mogli	Border Collie	1	1	5	1	0	0	3	2	2	3	2	0	1	2	2	2							0.8	1.6	1	2
2	90806	12.27.2008 9:16 PM	Momme	Border Collie	1	1	1	1	0	0	2	1	4	2	3	0	3	2			1	2	2	2	1	0					0.67
1	10040	11.30.2007 11:59 AM	Momo	Border Collie	1	1	3	2	1	0	3	2	3	2	3	2	2	2	2	2							1.6	1.8	1.75	1.67
1	1046	09.12.2007 10:39 AM	Momo	Border Collie	1	1	5	2	0	3	2	1	3	2	2	0	2	3	2	2							2	2	1.5	1.33
1	13140	12.30.2007 9:40 PM	Nala	Border Collie	1	1	0.9	2	0	0	2	2	2	3	2	0	2	1	1	2							0.4	1.2	2	0.67
1	5283	10.21.2007 12:53 PM	nano	Border Collie	1	1	1.1	1	0	1	2	2	2	2	3	0	2	3	2	2							0.8	2	1.5	1.67
2	78264	11.03.2008 11:21 AM	Nelly	Border Collie	1	1	2	2	0	1	2	2	2	4	2	0	2	3			0	2	2	1	0	0					0.67
1	4949	10.18.2007 2:16 PM	Nick	Border Collie	1	1	8	1	0	1	2	2	3	2	2	0	2	3	2	2							1	1.8	1.25	1
2	53108	07.06.2008 11:05 AM	nou	Border Collie	1	1	2	1	0	1	3	2	2	1	3	0	2	3			0	1	3	2	1	0					0.08
1	3627	10.05.2007 3:52 PM	pauline	Border Collie	1	1	1	2	0	0	3	1	3	1	3	0	1	0	2	2							1.6	2	2	1
1	5035	10.19.2007 7:53 AM	pelle	Border Collie	1	1	2	1	0	2	2	2	3	2	3	0	2	3	2	1							0.2	1.8	1.25	1.67
2	90426	12.25.2008 8:57 AM	Penny	Border Collie	1	1	1.3	2	0	0	3	2	3	2	2	0	2	1			0	2	2	2	1	0					0.25
1	6608	10.31.2007 5:40 PM	Pit	Border Collie	1	1	0.4	1	1	1	2	1	2	2	3	2	1	1	2	2							2	1.6	2	2
1	10651	12.04.2007 4:02 PM	quick	Border Collie	1	1	6	1	0	1	2	2	2	4	2	2	3	1	1	1							1.6	2	0.25	1.67
1	5000	10.18.2007 9:59 PM	Rico	Border Collie	1	1	4	1	0	0	2	2	3	2	2	0	2	3	2	2							0.6	2	1	2
2	75184	10.18.2008 6:32 PM	Rico	Border Collie	1	1	0.6	1	0	2	2	2	2	1	3	0	1	2			0	2	2	1	1	0					1.58
1	9323	11.25.2007 5:26 PM	Rocky	Border Collie	1	1	5	1	0	3	2	1	3	4	3	1	1	1	2	2							1.2	2	1.25	2
1	3600	10.05.2007 12:41 PM	Ronny	Border Collie	1	1	5	1	0	0	4	2	3	2	2	0	2	0	1	2							1	0.8	1.75	1
1	13266	01.01.2008 4:42 PM	sam	Border Collie	1	1	0.3	1	0	2	2	2	3	2	3	0	2	0	2	2							1.2	2	1.75	1
1	13302	01.01.2008 9:38 PM	Sammy	Border Collie	1	1	2	1	1	2	2	2	3	1	2	0	2	3	2	2							1.4	1.8	1	2
2	84351	11.28.2008 8:28 AM	Sammy	Border Collie	1	1	2	1	0	0	2	2	1	2	3	0	2	1			0	2	2	1	1	0					0.33
1	13469	01.03.2008 6:08 PM	Samy	Border Collie	1	1	1	1	0	0	2	2	3	3	3	0	1	0	2	2							1.4	2	1.75	2
2	64722	08.30.2008 4:43 PM	Semmel	Border Collie	1	1	5.5	1	0	0	3	1	3	4	2	0	2	3			0	2	3	2	0	0					0.25
2	72783	10.09.2008 8:44 PM	shari	Border Collie	1	1	1.7	2	1	0	3	2	3	2	3	1	2	1			1	1	2	2	0	0					1.17
1	9468	11.26.2007 3:30 PM	Sky	Border Collie	1	1	3	2	1	0	2	2	2	3	3	0	2	3	2	2							1.2	2	1	0.67
1	5043	10.19.2007 8:35 AM	Skyline	Border Collie	1	1	2	1	1	2	3	2	2	3	3	0	2	0	1	2							0.4	1.8	0.75	2
1	8215	11.15.2007 8:49 PM	Spike	Border Collie	1	1	1	1	0	0	3	1	2	2	3	1	2	0	2	2							1.2	2	1.5	1.33
2	90583	12.25.2008 10:33 PM	stempel	Border Collie	1	1	1.5	2	1	3	2	2	3	2	3	1	2	2			0	2	2	2	1	1					0.5
1	1753	09.18.2007 5:46 PM	tessa	Border Collie	1	1	3	2	0	1	1	2	1	2	3	1	1	2	1	1							1.2	1.6	1.5	0.67
2	65666	09.04.2008 4:59 PM	TIA	Border Collie	1	1	2	2	1	0	2	1	3	1	2	1	1	2			0	2	2	1	1	0					0.33
2	66555	09.09.2008 1:45 PM	Timmy	Border Collie	1	1	0.3	1	0	1	2	2	3	1	3	0	1	0			0	1	3	2	1	0					0.83
2	70072	09.27.2008 2:16 PM	ans	Border Terrier	3	1	1.5	1	0	3	2	2	2	4	3	1	2	2			0	1	2	2	1	1					0.92
2	60895	08.13.2008 11:18 AM	Apollo	Border Terrier	3	1	1.5	1	1	0	2	2	3	1	2	0	1	0			0	1	2	2	1	1					1.08
2	78219	11.02.2008 11:01 PM	AXA	Border Terrier	3	1	4	2	1	2	2	2	3	1	2	0	1	3			0	1	3	1	0	0					0.42
1	8326	11.16.2007 8:58 PM	Bella	Border Terrier	3	1	5	2	1	1	3	2	1	2	3	1	1	0	2	1							1.4	1.6	1.25	1.67
3	144	08.29.2007 6:59 PM	Benny	Border Terrier	3	1	7.5	1	1	1	2	2	3	2	2	0	2	0	2	2	0	1	2	1	0	1	1	1.4	1	1.33	0.5
2	79925	11.11.2008 2:44 PM	Bille	Border Terrier	3	1	8	2	1	3	2	2	3	1	2	2	1	3			0	1	2	2	1	0					0.67
1	3949	10.08.2007 10:55 PM	chucko	Border Terrier	3	1	6	1	0	0	2	2	1	2	3	0	1	1	2	2							1.4	1.8	2	2
2	85185	12.03.2008 9:34 AM	cim	Border Terrier	3	1	8	2	0	2	2	2	3	1	2	2	1	2			0	1	1	1	1	1					0.42
1	387	09.01.2007 10:34 AM	clara	Border Terrier	3	1	4	2	0	3	2	1	3	2	1	1	1	1	2	2							1.6	1.8	1.25	0.67
1	13183	12.31.2007 2:28 PM	conner	Border Terrier	3	1	5	1	0	2	3	2	3	2	3	0	1	0	2	1							0	1.8	1.5	2
2	87827	12.14.2008 5:49 PM	Curry	Border Terrier	3	1	1	2	0	0	3	2	2	2	2	0	2	0			0	1	2	1	1	1					0.75
1	8028	11.13.2007 10:54 PM	Dexter	Border Terrier	3	1	11	1	0	1	4	2	3	3	2	0	2	1	2	2							1.8	1.6	2	2
1	5686	10.24.2007 5:43 PM	Emma	Border Terrier	3	1	5	2	1	0	2	2	3	2	3	0	2	3	2	2							1.4	1.4	0.75	1.67
1	3181	10.01.2007 5:46 PM	Gina	Border Terrier	3	1	0.5	2	0	2	2	2	1	2	3	1	2	3	2	2							1.4	2	2	2
2	75906	10.22.2008 1:22 PM	immi	Border Terrier	3	1	3	1	0	1	3	2	3	2	3	0	1	0			1	1	2	2	0	0					0.58
2	59804	08.07.2008 10:37 AM	Jansen Renate	Border Terrier	3	1	1	2	0	0	2	2	3	3	2	1	2	3			0	2	2	1	0	1					0.58
2	57067	07.24.2008 12:33 AM	Joschi	Border Terrier	3	1	9	1	0	0	2	2	1	1	3	1	2	2			0	1	2	1	1	0					0.75
2	95204	01.19.2009 6:05 PM	Josh	Border Terrier	3	1	6	1	1	2	2	2	3	2	3	2	2	3			0	1	2	1	0	0					0.58
2	87423	12.12.2008 12:03 PM	Joy	Border Terrier	3	1	6	2	1	1	2	2	2	4	2	0	1	0			0	1	2	1	1	1					0.58
2	82923	11.22.2008 5:41 AM	Kimmy	Border Terrier	3	1	1.3	1	0	0	2	2	3	4	2	0	1	3			0	1	2	1	1	0					0.67
2	66254	09.07.2008 11:19 AM	Liese	Border Terrier	3	1	3	2	0	3	2	2	3	2	3	2	2	0			0	1	2	1	0	1					0.5
2	62726	08.20.2008 9:32 PM	Lilly	Border Terrier	3	1	2	2	1	2	3	2	3	1	3	0	2	0			1	2	2	2	1	0					1.17
2	95244	01.20.2009 9:32 AM	Maja	Border Terrier	3	1	4.75	2	1	0	2	2	2	1	2	2	1	0			0	1	2	1	0	1					1
1	9010	11.22.2007 7:38 PM	meiro	Border Terrier	3	1	3	1	1	1	2	2	1	2	3	0	1	1	2	2							1	2	0.75	2
2	68624	09.19.2008 2:34 PM	Norton	Border Terrier	3	1	12	1	0	1	3	1	3	4	3	0	1	0			0	2	2	1	1	0					0.75
1	6593	10.31.2007 3:57 PM	Paul	Border Terrier	3	1	5	1	0	0	2	2	3	2	2	0	1	1	2	2							1.8	0.6	1.25	2
2	58305	07.30.2008 9:44 PM	Pelle	Border Terrier	3	1	1	1	0	0	2	2	2	2	1	0	2	2			0	1	1	2	1	0					1.42
2	67308	09.12.2008 7:19 PM	Pelle	Border Terrier	3	1	1.5	1	1	0	2	2	2	3	2	0	2	2			0	2	2	1	1	1					0.58
3	3031	09.29.2007 11:56 PM	polly	Border Terrier	3	1	2.6	2	0	1	2	2	4	4	2	0	1	1	1	2	0	2	2	1	0	1	0.6	2	2	2	0.75
1	10496	12.03.2007 4:38 PM	Ralle	Border Terrier	3	1	0.9	1	0	2	2	2	3	2	3	0	2	1	1	2							1.6	1.8	1.75	1.67
2	54288	07.11.2008 9:19 AM	Rieke	Border Terrier	3	1	3.5	2	1	1	4	2	3	2	3	0	1	0			0	2	2	1	0	0					0.5
1	2349	09.22.2007 2:48 PM	rusty	Border Terrier	3	1	0.5	1	0	3	2	2	3	1	3	0	1	1	2	2							0.2	1.4	1.75	2
1	9636	11.27.2007 4:28 PM	Zorro	Border Terrier	3	1	8	1	0	3	2	1	3	3	3	0	2	3	1	2							1.8	2	0.75	1.33
1	6537	10.31.2007 7:47 AM	Dewna	Borzoi (a.k.a. Russian Hunting Sighthound)	10	1	5	2	0	3	1	2	3	2	3	2	2	3	2	2							1	1.6	1.75	1
1	8029	11.13.2007 11:26 PM	Elbur Kalinow	Borzoi (a.k.a. Russian Hunting Sighthound)	10	1	11.5	1	0	3	2	2	3	2	1	2	2	2	2	2							2	2	2	2
1	1937	09.19.2007 4:25 PM	Klingsor`s Valentin	Borzoi (a.k.a. Russian Hunting Sighthound)	10	1	2	1	0	2	2	2	3	1	3	1	3	1	2	2							1.8	1	1.75	1.33
2	59155	08.04.2008 12:58 AM	Pushkin	Borzoi (a.k.a. Russian Hunting Sighthound)	10	1	2.5	1	0	3	3	2	3	1	2	2	1	0			0	2	1	2	1	1					0.5
1	7257	11.06.2007 9:58 AM	vita	Borzoi (a.k.a. Russian Hunting Sighthound)	10	1	0.6	2	0	0	2	2	3	1	3	0	1	0	2	2							0.2	2	1	1.33
1	1944	09.19.2007 4:48 PM	Wanja	Borzoi (a.k.a. Russian Hunting Sighthound)	10	1	2	1	0	1	2	2	3	1	2	0	2	1	2	2							1.8	1.4	2	2
2	77326	10.29.2008 5:56 PM	Yasnyj	Borzoi (a.k.a. Russian Hunting Sighthound)	10	1	5	1	0	3	2	2	3	2	3	2	2	0			0	1	2	1	0	0					0.33
2	82804	11.21.2008 3:33 PM	Billi	Boston Terrier	9	1	0.4	1	0	0	2	2	3	1	2	0	1	2			0	1	3	2	0	1					0.5
2	82968	11.22.2008 10:56 AM	Bosti	Boston Terrier	9	1	0.8	1	0	0	2	2	3	2	2	0	2	3			0	1	3	2	0	0					0.58
2	95064	01.19.2009 4:06 AM	Bubbi	Boston Terrier	9	1	0.9	1	0	3	3	2	2	2	2	0	1	1			0	1	2	1	0	1					0.5
1	5371	10.22.2007 9:53 AM	Don	Boston Terrier	9	1	1.6	1	0	0	4	1	3	2	3	0	1	1	1	2							1.2	1.2	1.25	0.33
2	74243	10.15.2008 4:03 PM	Dozer	Boston Terrier	9	1	0.7	1	0	3	2	2	2	2	2	0	1	0			0	1	2	1	0	0					0.42
1	11937	12.14.2007 8:46 PM	Fernando	Boston Terrier	9	1	1.3	1	0	3	2	2	4	4	1	0	2	2	2	2							1.4	2	1.5	2
2	65023	09.01.2008 5:22 PM	Frida	Boston Terrier	9	1	0.3	2	0	1	2	2	3	2	2	0	1	1			0	1	2	1	0	0					0.5
1	5779	10.25.2007 7:51 AM	Harmony	Boston Terrier	9	1	8	2	0	0	4	2	3	2	2	1	2	0	2	2							1	1.8	0.75	2
1	404	09.01.2007 5:38 PM	Henrie	Boston Terrier	9	1	3	1	0	3	2	2	2	4	2	0	2	0	2	2							0.6	1.2	0	1
2	73507	10.12.2008 7:24 PM	Oscar	Boston Terrier	9	1	1	1	0	1	2	2	3	2	2	0	1	3			0	1	2	1	0	0					0.92
2	93157	01.09.2009 9:43 PM	Spartacus	Boston Terrier	9	1	0.7	1	0	1	2	2	2	4	2	0	1	2			0	1	1	2	1	1					1
2	53983	07.10.2008 6:40 AM	voodoo	Boston Terrier	9	1	8	2	1	3	2	1	3	1	3	2	1	2			0	1	2	1	1	1					0.42
1	4183	10.11.2007 12:58 PM	yoda	Boston Terrier	9	1	2	1	0	0	2	1	2	4	2	0	2	2	2	2							1	1.4	1.75	1.67
3	7875	11.12.2007 12:40 PM	Asta la vista	Bouvier des Flandres	1	1	4.5	2	0	2	2	2	3	3	2	1	2	3	1	1	0	1	2	1	0	0	0.6	1.8	1	2	0.25
1	4662	10.16.2007 7:49 AM	Ballu	Bouvier des Flandres	1	1	1.8	1	0	2	2	1	3	2	3	0	2	2	1	2							2	1.8	1.75	0.33
1	6980	11.03.2007 6:53 PM	Balou	Bouvier des Flandres	1	1	2	1	0	3	2	2	3	2	2	0	2	1	2	2							0	1.6	0.75	0.33
1	8685	11.20.2007 8:29 AM	Ben	Bouvier des Flandres	1	1	13	1	1	0	2	2	2	1	2	1	2	3	2	2							1.8	0.8	2	1.33
1	9979	11.29.2007 9:20 PM	Betty	Bouvier des Flandres	1	1	2	2	0	3	1	2	4	2	2	0	2	3	2	2							1.6	2	0.75	2
1	4646	10.15.2007 10:28 PM	Djun	Bouvier des Flandres	1	1	2	2	0	3	2	2	3	3	3	2	2	1	2	2							0.6	1.8	1.75	0.67
2	90911	12.28.2008 7:56 PM	Emma	Bouvier des Flandres	1	1	0.9	2	0	1	2	2	3	2	3	0	1	3			0	1	2	2	1	0					0.5
1	220	08.30.2007 12:26 PM	Feeby	Bouvier des Flandres	1	1	2	2	0	1	2	2	3	1	3	0	1	1	2	2							1.6	2	2	1
2	54727	07.14.2008 11:54 AM	Gay	Bouvier des Flandres	1	1	3	1	0	3	3	2	3	3	3	0	2	3			0	2	2	2	1	0					0.42
2	52868	07.04.2008 1:17 PM	Joy	Bouvier des Flandres	1	1	13	2	1	1	3	2	3	3	3	1	1	3			0	2	1	1	1	0					0.08
2	52983	07.05.2008 11:34 AM	Nils-Zohra	Bouvier des Flandres	1	1	2	1	0	1	2	2	3	3	1	1	2	1			0	1	2	1	1	1					0.75
2	77285	10.29.2008 2:59 PM	odin	Bouvier des Flandres	1	1	3.5	1	0	3	2	2	3	1	2	1	2	1			0	1	2	1	0	1					0.25
2	80729	11.14.2008 11:04 AM	Poldi	Bouvier des Flandres	1	1	1	1	1	1	1	2	2	2	2	1	2	3			0	1	2	1	1	0					0.25
3	3709	10.06.2007 3:34 PM	quadro	Bouvier des Flandres	1	1	2	1	0	2	2	2	3	3	1	1	1	2	2	2	0	2	2	1	0	1	1.2	1.6	1.75	1.33	0.42
2	59865	08.07.2008 1:57 PM	Tigger	Bouvier des Flandres	1	1	6.5	2	0	2	2	2	3	2	1	2	2	0			0	1	1	2	1	1					0.17
2	82624	11.20.2008 9:10 PM	yago	Bouvier des Flandres	1	1	5	1	1	3	4	2	3	2	1	1	1	1			0	1	2	1	1	0					1.42
1	9100	11.23.2007 6:20 PM	Amy	Boxer	2	1	1	2	0	1	2	2	2	3	2	0	3	1	1	2							0.2	1.6	2	1.33
1	7987	11.13.2007 2:08 PM	Andor	Boxer	2	1	9.5	1	0	3	3	1	3	1	2	0	1	1	2	2							2	2	0.5	1.33
1	3325	10.02.2007 11:09 PM	Apollo	Boxer	2	1	1.5	1	0	1	2	2	3	3	2	1	2	3	2	2							1	1.8	1.25	1.67
1	7505	11.08.2007 2:49 PM	Apollo	Boxer	2	1	10	1	0	0	2	2	3	3	1	0	1	1	2	2							1.2	2	0.75	2
1	1469	09.16.2007 11:15 AM	ashley	Boxer	2	1	2	2	0	0	3	2	3	2	3	0	1	2	2	2							1	1.4	1.75	2
1	8672	11.19.2007 11:45 PM	Askan	Boxer	2	1	8.8	1	0	1	2	2	3	4	3	2	2	3	2	2							2	1.6	1.5	2
1	976	09.11.2007 6:33 PM	Athos	Boxer	2	1	1	1	0	2	3	2	3	1	3	0	1	1	1	2							1.4	1.8	0.75	2
1	11237	12.08.2007 8:06 PM	baby	Boxer	2	1	0.2	2	0	0	2	1	1	1	2	0	2	0	2	2							1.6	2	1.75	1.67
2	76674	10.26.2008 8:36 PM	Bandit	Boxer	2	1	0.2	1	0	0	2	2	2	1	3	0	1	0			1	1	1	1	0	0					0.75
1	7577	11.09.2007 9:17 AM	bello	Boxer	2	1	4	1	1	0	4	1	1	2	3	0	1	1	2	1							1.2	1.2	1	0
1	2046	09.19.2007 10:24 PM	Ben	Boxer	2	1	7.5	1	1	3	2	2	4	3	3	1	2	0	2	2							2	2	2	2
2	60484	08.10.2008 11:15 PM	Bennja	Boxer	2	1	0.7	2	0	1	2	2	2	2	2	1	1	2			0	1	2	1	1	1					0.58
2	74056	10.14.2008 9:56 PM	Blanca	Boxer	2	1	4	2	1	0	2	2	3	4	2	0	2	1			0	2	2	1	0	0					0.67
1	10083	11.30.2007 7:39 PM	Bonny	Boxer	2	1	3	2	1	1	4	2	3	2	2	1	2	3	2	2							0.2	1.8	1.75	1.33
2	68944	09.21.2008 10:36 PM	Bonny	Boxer	2	1	2	2	1	0	2	2	3	3	3	0	2	3			1	2	2	1	1	0					0.25
1	7908	11.12.2007 4:55 PM	Boss	Boxer	2	1	2	1	0	1	3	2	2	1	2	0	1	0	2	2							1.8	2	1.75	2
1	1584	09.17.2007 1:09 PM	bronco	Boxer	2	1	2	1	1	0	3	2	3	1	2	0	1	1	2	2							1.6	1.6	2	1.33
1	7628	11.09.2007 5:38 PM	Bronco	Boxer	2	1	8	1	0	2	2	1	3	2	3	0	2	0	1	2							1.4	1.4	0.75	2
1	8503	11.18.2007 5:40 PM	Bubi	Boxer	2	1	0.6	1	0	3	2	2	3	3	2	0	1	2	2	2							1.6	2	2	2
1	8049	11.14.2007 11:24 AM	cäsar	Boxer	2	1	10	1	0	2	3	2	3	4	2	0	1	1	1	2							0.8	1.8	0.25	1.67
1	12050	12.16.2007 3:54 PM	chicco	Boxer	2	1	6	1	0	1	2	1	3	3	3	1	3	0	2	2							2	2	2	2
2	77956	10.31.2008 8:33 PM	chika	Boxer	2	1	1.2	2	0	3	2	1	4	3	2	0	1	0			0	1	2	1	1	1					0.5
2	77225	10.29.2008 11:41 AM	Chulo	Boxer	2	1	2	1	1	0	2	2	2	2	3	0	3	2			0	1	2	2	1	0					0.92
2	82870	11.21.2008 6:10 PM	cof	Boxer	2	1	1.5	2	0	1	3	2	3	3	3	1	1	1			1	2	1	1	0	0					0.83
1	1750	09.18.2007 5:08 PM	cora	Boxer	2	1	2	2	0	0	2	2	3	2	3	0	1	0	1	2							0.2	2	1.5	0.33
1	959	09.11.2007 4:06 PM	Cora	Boxer	2	1	7	2	1	2	3	2	2	3	3	1	2	3	2	2							1.4	1.6	1.5	2
2	71549	10.04.2008 8:51 PM	Crema	Boxer	2	1	2	2	1	0	3	2	2	4	2	0	2	2			0	1	2	1	1	0					0.58
1	3213	10.01.2007 10:31 PM	dana	Boxer	2	1	1	2	0	2	3	2	3	1	2	0	1	1	2	2							0.2	1.4	2	1
1	7022	11.04.2007 4:38 AM	Dankah	Boxer	2	1	0.9	2	1	1	2	2	2	3	1	0	2	3	2	2							0.8	1.4	2	2
1	5886	10.25.2007 8:28 PM	dina	Boxer	2	1	0.4	2	0	3	3	2	2	3	3	0	1	0	1	2							0	0.8	2	0.67
2	77706	10.31.2008 9:46 AM	Donja	Boxer	2	1	3	2	1	0	3	2	3	2	2	0	2	2			0	1	2	1	0	0					0.83
1	10953	12.06.2007 8:04 PM	Donna	Boxer	2	1	2	2	1	1	4	2	2	3	1	0	2	1	2	2							1.4	1.6	1	2
2	60585	08.11.2008 4:02 PM	Donna	Boxer	2	1	1	2	0	3	2	2	2	2	3	2	3	2			1	3	1	2	1	0					0.83
2	79984	11.11.2008 6:30 PM	Eika	Boxer	2	1	4.5	2	0	3	2	2	4	2	1	0	1	2			0	1	2	1	1	0					0.5
1	13764	01.06.2008 1:24 PM	Estella	Boxer	2	1	6	2	0	1	4	1	3	2	1	0	1	0	1	2							1.6	0.2	1.5	1.67
1	11634	12.11.2007 9:10 PM	Fabio	Boxer	2	1	3	1	0	0	2	1	2	2	3	0	2	1	1	1							1.2	1.6	1.75	2
2	65224	09.02.2008 11:28 PM	Fenja	Boxer	2	1	0.5	2	0	1	2	2	2	2	3	1	2	0			0	1	2	1	0	0					0.33
1	9958	11.29.2007 7:11 PM	Filou	Boxer	2	1	0.5	1	0	0	2	2	2	2	2	0	2	2	2	2							1.6	1.8	1.75	2
2	62623	08.20.2008 2:30 PM	Finn	Boxer	2	1	2	1	0	2	4	2	3	1	3	0	1	0			0	1	2	2	1	0					0.58
2	71064	10.02.2008 10:58 AM	Finn	Boxer	2	1	3	1	0	2	2	2	3	2	2	1	1	0			0	1	2	1	1	1					0.75
1	4173	10.11.2007 12:00 PM	Gina	Boxer	2	1	2	2	1	0	2	2	2	2	2	0	2	2	2	2							0.4	1.8	1	2
1	1244	09.13.2007 11:50 PM	Gismo	Boxer	2	1	4	1	1	2	2	2	3	2	3	0	3	0	2	2							2	2	2	2
1	7423	11.07.2007 4:03 PM	Hannibal	Boxer	2	1	4	1	0	0	2	2	3	1	3	0	2	1	2	2							1	1.2	1	2
2	88476	12.16.2008 7:19 PM	Henry	Boxer	2	1	2.9	1	0	1	3	1	3	3	2	0	2	0			0	2	2	1	1	1					0.33
1	4657	10.16.2007 4:39 AM	Herbst	Boxer	2	1	0.3	2	0	1	2	2	3	1	2	0	1	1	2	2							1.6	1.6	1.25	2
2	93868	01.14.2009 1:44 PM	Holly	Boxer	2	1	1	2	0	0	2	2	3	4	2	0	1	2			0	1	2	1	0	0					0.67
1	4247	10.11.2007 9:55 PM	Jack	Boxer	2	1	1.5	1	0	2	2	2	2	1	2	1	1	1	2	2							1.2	1.4	1.75	2
2	89848	12.21.2008 7:15 PM	jack	Boxer	2	1	3	1	0	2	4	1	3	4	3	0	2	0			1	2	2	1	1	0					0.58
1	13937	01.07.2008 9:31 PM	Jacky	Boxer	2	1	5	2	1	0	2	2	2	4	3	0	1	0	2	2							1	1.6	1.75	1.67
1	4009	10.09.2007 5:19 PM	Jessie	Boxer	2	1	6	2	1	0	4	2	3	2	2	0	1	0	2	2							1	1.4	1.5	2
2	65947	09.05.2008 10:45 AM	Kiara	Boxer	2	1	2	2	0	0	3	2	2	3	2	0	2	3			0	1	2	2	1	1					0.33
1	7756	11.11.2007 10:57 AM	kira	Boxer	2	1	0.4	2	0	0	3	2	2	1	3	1	2	0	2	1							1.8	2	2	2
1	11705	12.12.2007 2:21 PM	laika	Boxer	2	1	5	2	0	0	2	2	3	3	3	0	2	1	2	1							1	1.2	1	1.67
2	76048	10.22.2008 9:18 PM	Line	Boxer	2	1	1.5	2	1	0	4	2	3	4	1	0	2	3			0	3	3	1	1	0					1.08
2	80007	11.11.2008 7:56 PM	Maggy	Boxer	2	1	4	2	0	3	3	2	3	3	3	0	3	0			1	2	1	1	1	0					0.25
1	2099	09.20.2007 10:56 AM	Mara	Boxer	2	1	1.5	2	0	1	2	2	2	2	3	1	1	1	1	1							0	2	0.75	1
1	12717	12.26.2007 11:54 AM	mascha	Boxer	2	1	5	2	1	1	2	1	3	1	3	1	2	2	1	1							1.4	1.6	2	1.67
1	5400	10.22.2007 1:20 PM	maurice	Boxer	2	1	9	1	0	0	2	2	2	3	2	1	1	0	2	2							1.4	2	1.25	2
1	375	08.31.2007 9:59 PM	Max	Boxer	2	1	2.5	1	0	3	2	2	3	3	2	0	2	1	2	2							1.6	2	1	1
1	12199	12.18.2007 12:30 PM	max	Boxer	2	1	3	1	0	0	2	1	3	1	2	0	1	0	2	2							2	2	1.75	2
2	58010	07.29.2008 12:24 PM	Max	Boxer	2	1	0.3	1	0	0	3	1	3	4		0	1	0			0	1	2	1	1	0					0.5
2	54443	07.11.2008 8:16 PM	Max	Boxer	2	1	3	1	0	3	3	2	3	4	2	0	1	0			0	2	2	2	1	1					0.25
1	11508	12.10.2007 8:56 PM	Mia	Boxer	2	1	0.6	2	0	0	2	1	2	2	2	0	2	1	1	2							1.4	1.8	2	1
1	79	08.29.2007 12:24 PM	MIA	Boxer	2	1	1.2	2	0	0	2	2	2	2	3	0	2	3	2	2							1	1.4	1.75	0.67
2	73687	10.13.2008 3:31 PM	Monty	Boxer	2	1	2	1	0	2	2	2	3	2	3	0	3	2			1	1	2	1	0	0					1.25
1	915	09.11.2007 10:37 AM	Murmel	Boxer	2	1	8	2	1	3	2	1	4	2	2	0	1	1	2	1							1	1	0.5	1.67
1	6547	10.31.2007 10:21 AM	Nanuk	Boxer	2	1	0.8	1	0	3	2	2	3	1	3	1	2	2	2	2							1.2	2	1.75	2
1	3696	10.06.2007 11:13 AM	Nelly	Boxer	2	1	1	2	0	0	2	2	2	2	1	0	2	2	1	2							1.4	1.8	1.75	2
1	2587	09.25.2007 12:07 PM	Odin	Boxer	2	1	3	1	0	0	2	2	2	2	2	0	2	2	1	2							1.2	1.4	1.25	2
1	12341	12.19.2007 7:58 PM	Ohio vom Schwarzen Gold	Boxer	2	1	7.5	1	0	2	2	2	3	2	1	2	1	2	2	2							2	2	1.5	2
2	53336	07.07.2008 7:56 PM	Olivia	Boxer	2	1	3	2	0	0	2	2	3	2	2	0	2	1			0	1	2	1	0	0					0.33
1	3682	10.05.2007 11:57 PM	Opal	Boxer	2	1	3	1	0	0	2	1	3	1	3	0	2	3	2	2							0.6	1.4	1.25	2
2	62479	08.19.2008 10:58 PM	Pam	Boxer	2	1	6	2	0	2	3	2	2	3	2	0	1	1			0	1	2	2	1	0					0.42
2	76653	10.26.2008 6:35 PM	Paula	Boxer	2	1	1.25	2	0	0	3	2	3	2	2	1	2	1			0	2	1	1	1	0					1.25
2	67606	09.15.2008 11:57 AM	Paula	Boxer	2	1	4	2	0	0	2	2	3	2	2	0	3	1			0	1	2	2	1	1					0.42
1	10956	12.06.2007 8:30 PM	pe?pe	Boxer	2	1	1.5	1	0	0	4	2	2	3	3	0	1	0	2	2							0.4	1.6	1.5	2
2	83868	11.26.2008 3:07 PM	Peyton	Boxer	2	1	0.3	2	0	1	2	1	2	1	3	0	2	1			0	2	1	1	1	1					1
1	1566	09.17.2007 9:19 AM	rock	Boxer	2	1	1	1	0	0	3	1	2	4	3	0	1	1	2	1							1.4	1.2	1.5	2
1	13669	01.05.2008 5:30 PM	Rocky	Boxer	2	1	1	1	0	0	2	1	3	1	3	0	1	2	1	2							1.4	2	1.5	2
2	85945	12.05.2008 10:04 PM	Rocky	Boxer	2	1	0.1	1	0	2	2	1	2	3	3	0	1	0			1	1	2	1	1	0					0.5
2	76789	10.27.2008 2:01 PM	Rocky	Boxer	2	1	0.9	1	0	1	2	2	2	2	2	0	1	1			0	1	1	1	1	0					1.83
1	6191	10.28.2007 12:42 PM	ronja	Boxer	2	1	1	2	0	3	2	1	3	1	2	1	1	2	2	2							1.4	1.8	2	2
2	80167	11.12.2008 2:46 PM	Samy	Boxer	2	1	2.25	1	1	3	4	1	4	1	2	0	2	1			0	1	2	2	0	0					0.75
1	9622	11.27.2007 2:55 PM	shira	Boxer	2	1	0.5	2	0	2	3	2	3	1	3	0	1	1	2	2							2	1.2	1.75	2
1	2097	09.20.2007 10:49 AM	Sunny	Boxer	2	1	2.5	1	0	0	3	2	2	2	3	1	1	1	1	1							1.8	0.6	1.75	1
1	7202	11.05.2007 3:36 PM	Taison	Boxer	2	1	0.5	1	0	1	2	2	2	1	2	0	1	1	2	2							1.8	2	2	2
1	13518	01.04.2008 10:02 AM	Tango	Boxer	2	1	2	1	0	2	4	1	4	2	2	0	1	1	2	2							1	1.6	1.75	2
2	62144	08.18.2008 3:49 PM	T-Bag	Boxer	2	1	1.25	1	1	1	4	2	2	3	2	0	3	0			0	1	3	1	1	0					0.5
2	54124	07.10.2008 3:35 PM	Tosca	Boxer	2	1	6	2	1	3	2	2	3	2	2	0	2	3			0	2	2	2	0	0					0.42
1	2293	09.21.2007 7:24 PM	Tyson	Boxer	2	1	2	1	0	2	2	2	2	2	3	0	1	1	2	2							0.2	1	0.5	1.33
1	13964	01.08.2008 8:57 AM	Tyson	Boxer	2	1	2	1	0	3	4	1	2	3	2	0	1	0	2	2							1.6	1.6	1.5	1.67
1	355	08.31.2007 4:22 PM	Tyson	Boxer	2	1	5.5	1	0	1	2	1	2	2	2	0	2	2	2	2							1.2	2	1	2
2	71091	10.02.2008 12:52 PM	tyson	Boxer	2	1	0.6	1	0	0	3	2	2	1	2	0	1	0			0	1	2	2	1	1					1.67
2	80504	11.13.2008 4:04 PM	Tyson	Boxer	2	1	0.9	1	0	0	2	1	3	1	3	0	1	0			1	1	3	2	1	1					0.5
2	69883	09.26.2008 1:24 AM	Tyson	Boxer	2	1	1	1	0	0	3	2	2	2	3	0	1	0			1	1	2	1	1	0					1.25
2	69424	09.24.2008 9:23 AM	Wilma	Boxer	2	1	0.75	2	0	1	2	1	3	4	2	0	1	1			0	1	2	1	0	0					1.08
1	12594	12.23.2007 7:35 PM	Yukon	Boxer	2	1	8	1	1	0	2	1	3	2	2	1	1	2	2	2							1.4	1.4	1.25	2
1	7419	11.07.2007 3:49 PM	luna	Brazilian Terrier	3	1	2	2	0	0	4	2	3	2	2	0	2	0	1	2							0.8	0.8	2	0.67
1	3833	10.07.2007 9:15 PM	Alexis	Briard	1	1	12	2	0	0	3	2	3	2	2	0	1	0	2	1							1.2	1	0.75	1.67
2	67443	09.14.2008 6:39 AM	amor	Briard	1	1	1	1	0	3	2	1	3	1	3	0	1	2			0	1	2	1	1	1					0.67
1	10811	12.05.2007 8:01 PM	Annette	Briard	1	1	2	2	1	2	2	2	3	1	3	1	2	3	2	2							0.8	2	2	2
1	3129	10.01.2007 9:17 AM	Anouk	Briard	1	1	2	2	0	2	3	2	2	3	3	1	3	3	1	1							1	1.6	1	2
2	76647	10.26.2008 4:56 PM	Ayoka	Briard	1	1	0.4	2	0	1	2	1	3	2	2	1	1	1			0	2	2	2	1	0					0.92
2	54413	07.11.2008 5:20 PM	Balou	Briard	1	1	11	1	1	2	4	2	3	4	2	1	1	0			0	1	2	1	1	0					0.33
1	11468	12.10.2007 4:40 PM	Barny	Briard	1	1	6	1	0	0	2	2	3	3	3	2	1	3	1	2							0	1.6	0.75	1
1	2889	09.28.2007 12:45 PM	Basti	Briard	1	1	2	1	0	2	2	2	3	1	2	2	1	2	2	1							2	1.6	2	1.67
1	4845	10.17.2007 3:40 PM	Bayanga	Briard	1	1	0.7	2	0	0	2	2	2	2	1	0	2	2	2	2							0	1.8	1.75	1.33
1	13612	01.04.2008 9:04 PM	Benny	Briard	1	1	2	1	0	0	3	1	3	3	3	0	2	2	1	2							1	1.4	1.75	1.33
1	7561	11.09.2007 12:46 AM	berta	Briard	1	1	4	2	0	1	2	2	3	3	2	1	1	1	1	2							0.4	1.8	1.25	1
2	90667	12.26.2008 11:15 AM	bibo	Briard	1	1	3	1	0	1	2	2	3	2	2	0	2	3			0	1	2	1	0	0					0.33
1	2807	09.27.2007 1:26 PM	Bijou	Briard	1	1	5	2	0	1	4	2	3	2	3	1	2	2	1	1							0	1.2	0.75	1
2	54405	07.11.2008 4:01 PM	Bijou	Briard	1	1	0.9	2	0	1	2	1	3	3	3	1	1	1			1	2	2	1	1	0					0.42
2	60888	08.13.2008 10:10 AM	bjonda	Briard	1	1	0.6	2	0	1	2	2	3	2	2	0	1	2			0	2	2	1	1	1					0.75
1	7669	11.10.2007 1:32 PM	Bonny	Briard	1	1	3.8	2	0	1	2	2	4	3	1	0	2	1	1	2							2	1.4	1.75	1.67
1	12333	12.19.2007 7:10 PM	Camillo	Briard	1	1	5	1	0	1	2	2	3	4	2	0	2	3	2	1							1	1.8	1.25	1.67
2	73632	10.13.2008 11:38 AM	Carlson	Briard	1	1	4	1	0	0	2	2	3	4	2	0	2	3			0	1	2	1	1	0					0.67
1	9009	11.22.2007 7:17 PM	Chiva von der Lohdille	Briard	1	1	2.5	2	0	0	2	2	3	4	2	0	2	2	1	2							1.6	1.8	1.75	0.67
2	78515	11.04.2008 9:02 PM	Chopain	Briard	1	1	6	1	0	1	2	2	3	4	1	0	2	3			0	1	2	1	0	0					0.25
1	1113	09.12.2007 6:26 PM	cooper	Briard	1	1	0.2	1	0	0	2	2	3	3	3	0	2	1	2	2							1.8	1.8	2	0.33
1	7144	11.05.2007 9:25 AM	Cousteau	Briard	1	1	0.6	1	0	3	2	2	2	3	3	1	2	3	1	2							2	0.8	1.25	0.33
1	12839	12.27.2007 7:58 PM	Cousteaz	Briard	1	1	2	1	0	3	2	2	3	3	3	0	1	0	2	2							1.2	1.6	1.5	0.67
2	73703	10.13.2008 4:14 PM	dicki	Briard	1	1	9	1	0	0	3	2	3	3	3	0	1	1			1	1	2	2	1	0					0.67
1	5259	10.21.2007 8:41 AM	diego	Briard	1	1	2.5	1	0	1	3	2	3	2	3	0	2	2	1	1							0.6	2	1.5	0
1	2250	09.21.2007 10:06 AM	Diva	Briard	1	1	1.3	2	0	0	2	2	3	4	3	0	2	3	2	2							0.4	1.8	1.5	1.67
2	53960	07.09.2008 11:34 PM	Dixie	Briard	1	1	1.4	2	0	0	2	1	3	2	3	0	2	3			0	2	1	2	1	1					1.17
2	54467	07.11.2008 11:46 PM	DJ	Briard	1	1	2	1	0	3	2	2	3	2	3	0	1	3			0	1	2	1	1	0					0.83
2	53770	07.09.2008 10:40 AM	Emil	Briard	1	1	4	1	0	3	2	2	3	3	2	0	2	1			0	1	2	1	1	0					0.33
2	59281	08.04.2008 9:45 PM	enzo	Briard	1	1	0.3	1	0	0	2	1	3	1	3	0	2	1			0	2	3	1	0	0					0.33
2	78378	11.04.2008 1:20 AM	etienne	Briard	1	1	10	1	0	2	4	2	3	3	2	0	3	2			0	1	2	1	0	0					0
2	77364	10.29.2008 8:15 PM	finch	Briard	1	1	2.5	1	0	3	2	2	3	2	3	0	2	3			0	1	2	1	0	0					0.58
1	10822	12.05.2007 8:53 PM	Flens	Briard	1	1	1.5	1	0	0	2	2	3	3	3	0	2	2	2	2							1.6	2	1.5	1.67
2	58408	07.31.2008 1:40 PM	Friederike	Briard	1	1	0.9	2	0	1	2	2	3	2	3	0	1	2			0	2	3	2	1	0					0.42
2	89483	12.19.2008 8:00 PM	Frodo	Briard	1	1	1.2	1	0	3	2	2	3	1	2	1	1	2			0	1	1	1	1	0					0.92
1	11093	12.07.2007 7:17 PM	Guinness	Briard	1	1	10	1	0	3	2	2	3	4	2	1	2	3	2	1							1.8	1.8	0.75	2
2	79426	11.08.2008 6:38 PM	hakima	Briard	1	1	0.4	2	0	1	2	2	3	3	3	2	2	1			1	1	1	2	1	0					0.58
2	65286	09.03.2008 9:00 AM	Idefix	Briard	1	1	4	1	0	3	2	2	3	2	3	2	2	3			1	2	2	2	1	1					0.17
2	53996	07.10.2008 8:48 AM	Indigo	Briard	1	1	1.5	1	0	3	2	2	3	3	2	0	1	3			0	1	2	1	1	0					0.42
1	7364	11.07.2007 9:51 AM	ix	Briard	1	1	8	1	1	0	4	2	3	2	1	0	1	0	2	2							0.8	1	2	1.33
2	81564	11.16.2008 8:04 PM	Jolle	Briard	1	1	1.8	2	0	3	1	2	3	3	2	2	3	3			0	1	2	2	1	1					0.33
1	11993	12.15.2007 7:26 PM	josef	Briard	1	1	4	1	0	1	2	2	3	3	2	0	1	2	2	2							0.6	2	1	1.67
1	5716	10.24.2007 7:47 PM	Joy	Briard	1	1	5	2	1	2	3	2	3	1	2	0	1	0	1	2							1.4	0.8	1.75	1.67
2	52866	07.04.2008 1:14 PM	Karin	Briard	1	1	4	2	0	0	2	2	3	2	2	1	2	3			0	1	2	1	0	1					1
2	66845	09.10.2008 10:40 PM	keanu	Briard	1	1	0.3	1	0	3	2	1	3	3	2	2	1	3			0	3	2	2	0	1					0.33
2	53153	07.06.2008 3:02 PM	Keegan vom Hexenhof	Briard	1	1	2.5	1	0	0	2	2	3	2	3	0	3	3			0	1	2	1	0	0					0.42
2	79893	11.11.2008 11:45 AM	Kimba	Briard	1	1	0.6	2	0	1	3	2	3	2	3	0	1	1			0	1	2	1	1	1					0.42
1	5132	10.19.2007 6:44 PM	Kira	Briard	1	1	0.4	2	0	2	2	1	3	3	1	0	2	1	1	1							1.2	1.2	1.75	1.67
1	7217	11.05.2007 5:01 PM	Kyron	Briard	1	1	0.6	1	0	3	2	2	3	2	2	2	1	1	2	2							1.6	0.6	2	1.67
2	53491	07.08.2008 1:10 PM	Leeloo	Briard	1	1	1	2	0	1	2	2	3	2	3	0	1	3			1	2	2	1	1	0					0.5
1	9129	11.23.2007 9:42 PM	Leif	Briard	1	1	3	1	0	0	3	2	3	2	2	0	1	2	2	1							1.6	0.2	1.25	0.67
2	66193	09.06.2008 8:33 PM	Leo	Briard	1	1	3	1	0	0	2	1	2	2	1	0	1	1			0	1	2	2	1	1					0.58
2	54462	07.11.2008 10:59 PM	leo	Briard	1	1	5	1	0	0	3	2	3	2	3	0	1	3			0	1	2	1	0	1					0.42
1	4588	10.15.2007 2:49 PM	leon	Briard	1	1	6	1	0	0	2	2	3	1	3	2	1	3	1	2							0	1.6	1	0.33
2	64261	08.27.2008 10:37 PM	Lilli	Briard	1	1	1	2	0	1	2	2	3	3	2	0	2	2			0	1	2	1	0	1					1.08
1	1990	09.19.2007 7:46 PM	Lola	Briard	1	1	5	2	0	2	3	2	3	3	3	2	2	2	1	2							0.8	1.8	0.25	1
2	70995	10.01.2008 10:19 PM	Mangoon	Briard	1	1	4	1	0	2	2	2	3	4	2	0	2	3			0	1	2	1	0	0					0.17
1	7362	11.07.2007 9:17 AM	Marta	Briard	1	1	1.3	2	0	0	2	2	3	2	2	0	2	2	2	2							0.4	2	1.25	0.33
2	84444	11.28.2008 6:26 PM	Max	Briard	1	1	4	1	0	1	2	2	3	2	3	0	3	3			0	2	2	1	1	0					1.17
2	54263	07.11.2008 7:47 AM	Maxi	Briard	1	1	6	1	1	1	4	2	3	1	2	0	2	1			0	1	2	1	1	0					0.75
2	78743	11.05.2008 5:51 PM	Mex	Briard	1	1	0.3	1	0	1	2	2	3	1	2	0	1	0			0	2	2	1	0	0					0.75
1	7168	11.05.2007 12:24 PM	momo	Briard	1	1	14	2	1	1	2	2	3	2	2	2	2	3	2	2							1.8	2	1.25	1.67
1	5967	10.26.2007 1:14 PM	Neelix	Briard	1	1	3	1	0	2	2	2	3	3	2	1	2	3	1	2							1.6	1.6	1.25	1.33
2	52943	07.04.2008 11:31 PM	Nobby	Briard	1	1	11	1	1	3	2	2	4	1	2	1	2	3			0	1	2	1	1	0					0.17
1	12656	12.25.2007 12:52 PM	pablo	Briard	1	1	5	1	0	3	2	2	3	1	1	0	1	3	2	2							0.2	1.8	2	0.67
1	13119	12.30.2007 6:35 PM	paco	Briard	1	1	3.5	1	1	1	2	2	3	2	3	0	1	3	2	1							1.2	2	2	2
1	11576	12.11.2007 2:43 PM	sheila	Briard	1	1	12	2	0	0	4	2	3	2	2	1	1	0	2	2							0.4	1.2	0.75	1.67
1	8758	11.20.2007 6:53 PM	simon	Briard	1	1	2	1	1	0	4	2	3	2	3	2	2	2	1	2							0.2	1.8	0.5	1.33
1	13912	01.07.2008 7:21 PM	Smauk	Briard	1	1	0.9	1	0	3	2	2	3	1	2	1	2	2	2	2							0.8	2	1.75	1.67
1	10868	12.06.2007 10:03 AM	Spoc	Briard	1	1	9	1	1	2	2	2	3	2	2	0	2	3	2	1							2	1.6	0.5	0.67
2	80643	11.13.2008 8:51 PM	sun	Briard	1	1	1.25	2	0	1	2	2	3	1	3	0	2	1			0	2	2	1	1	0					0.67
2	67366	09.13.2008 11:52 AM	Toni	Briard	1	1	1.25	2	0	1	2	2	3	1	2	0	2	2			0	2	2	1	1	0					0.58
1	5729	10.24.2007 9:08 PM	vivaldi	Briard	1	1	3	1	0	3	3	2	3	2	3	1	1	1	2	2							1.8	2	0.75	2
1	12322	12.19.2007 4:41 PM	Volmer	Briard	1	1	2	2	0	3	2	2	3	3	3	1	2	3	1	1							1.8	1.4	1.25	1.33
2	75524	10.20.2008 2:20 PM	x	Briard	1	1	5	2	1	0	2	1	3	2	3	1	2	1			1	1	1	1	1	0					1.25
1	6859	11.02.2007 7:03 PM	Yeti	Briard	1	1	4	1	1	2	2	2	2	2	3	1	2	3	2	2							0.2	1.6	0	0.33
2	53993	07.10.2008 8:34 AM	Aqui	Brittany Spaniel	7	1	12	2	1	2	4	2	3	2	2	1	2	3			0	1	2	1	0	0					0.42
1	1847	09.19.2007 11:07 AM	Bella	Brittany Spaniel	7	1	2.5	2	1	1	3	2	3	2	3	1	2	0	2	2							1.4	1.4	1.5	1.67
2	54502	07.12.2008 1:41 PM	C?r	Brittany Spaniel	7	1	1	1	0	0	2	2	2	3	2	0	2	2			0	1	2	2	0	1					1
2	66088	09.05.2008 4:57 PM	Calla	Brittany Spaniel	7	1	1.5	1	1	2	3	1	3	3	3	0	2	2			0	1	2	1	1	1					0.42
1	2782	09.27.2007 8:56 AM	Chico	Brittany Spaniel	7	1	3	1	1	1	4	2	3	2	3	0	2	1	1	2							1	1.6	2	1.67
1	10660	12.04.2007 4:58 PM	chopin	Brittany Spaniel	7	1	2	1	1	1	3	2	3	4	3	1	1	1	2	2							0.4	1	2	0
2	73881	10.14.2008 1:16 PM	Cindy	Brittany Spaniel	7	1	4	2	1	0	4	1	4	1	2	0	1	1			0	1	3	1	1	0					0.83
2	54146	07.10.2008 5:24 PM	Doro	Brittany Spaniel	7	1	8	1	0	1	4	2	3	1	2	0	1	1			0	1	2	1	1	1					0.92
1	4087	10.10.2007 12:25 PM	Fido	Brittany Spaniel	7	1	3	1	0	0	4	1	2	2	2	0	1	0	2	2							1	0.8	0.5	0.67
2	54016	07.10.2008 10:52 AM	Finn	Brittany Spaniel	7	1	2.5	1	0	0	4	1	3	1	2	0	2	0			0	2	2	2	1	0					0.5
2	54026	07.10.2008 11:20 AM	frodo	Brittany Spaniel	7	1	2	1	1	3	3	2	3	2	2	1	2	3			0	1	2	1	0	0					0.42
2	54181	07.10.2008 9:40 PM	goofy	Brittany Spaniel	7	1	5	1	1	2	4	2	2	2	2	1	2	1			0	1	3	2	1	1					0.83
2	54063	07.10.2008 12:51 PM	Hanna	Brittany Spaniel	7	1	8	2	1	0	4	2	2	2	2	2	1	3			0	2	2	1	1	1					0.92
2	54521	07.12.2008 6:00 PM	Hans	Brittany Spaniel	7	1	6	1	1	2	4	1	3	3	3	1	1	1			1	2	2	2	1	0					0.67
2	54135	07.10.2008 4:33 PM	Jana	Brittany Spaniel	7	1	3	2	1	1	4	2	3	2	3	2	2	3			0	1	2	1	0	0					0.67
2	78288	11.03.2008 1:57 PM	jolito	Brittany Spaniel	7	1	2	1	1	1	3	2	3	3	2	1	1	1			0	1	2	1	1	0					1.58
2	75583	10.20.2008 6:10 PM	Lana	Brittany Spaniel	7	1	4	2	1	1	4	2	2	3	2	0	1	0			0	1	2	1	1	1					0.5
2	54316	07.11.2008 11:54 AM	Lenda	Brittany Spaniel	7	1	4	2	1	0	4	2	3	2	3	0	1	2			1	2	3	1	1	0					1.33
2	71560	10.04.2008 11:08 PM	Lucy	Brittany Spaniel	7	1	8	2	1	0	4	2	3	3	3	1	2	1			0	1	3	1	1	1					0.92
2	54736	07.14.2008 12:41 PM	Michi	Brittany Spaniel	7	1	3	1	1	1	4	2	3	2	3	1	2	2			0	2	2	1	0	0					1
2	54507	07.12.2008 2:54 PM	Oliver	Brittany Spaniel	7	1	1	1	0	1	2	1	3	3	2	0	3	2			0	1	2	1	1	1					1.08
1	11526	12.10.2007 10:45 PM	Robert	Brittany Spaniel	7	1	9	1	1	0	4	2	3	2	3	0	1	1	1	2							1.2	1.6	0.75	2
1	1223	09.13.2007 6:33 PM	roby	Brittany Spaniel	7	1	4	1	0	1	4	2	2	4	2	0	1	0	2	2							1.6	1.2	1.5	1.67
1	3674	10.05.2007 10:09 PM	Runa	Brittany Spaniel	7	1	2	2	0	0	4	2	3	2	3	0	2	1	1	1							0.4	1	1.75	1.33
1	8950	11.22.2007 11:57 AM	sam	Brittany Spaniel	7	1	2	1	1	0	4	2	3	2	3	0	1	0	2	2							0.4	1.2	1.75	1.67
2	67707	09.15.2008 4:43 PM	Sancho	Brittany Spaniel	7	1	4	1	1	2	4	1	1	2	3	0	3	0			0	1	2	2	0	0					0.42
2	65611	09.04.2008 2:27 PM	Squiff	Brittany Spaniel	7	1	7	2	0	0	4	2	3	2	2	0	2	1			0	1	2	1	0	0					0.67
2	66366	09.08.2008 9:28 AM	Stitch	Brittany Spaniel	7	1	2.5	1	1	3	2	2	3	3	2	2	2	3			0	1	2	1	1	1					0.5
2	53468	07.08.2008 9:26 AM	Tecla	Brittany Spaniel	7	1	2.5	2	0	0	4	2	3	2	2	0	1	0			0	1	3	1	1	1					0.42
1	3984	10.09.2007 2:11 PM	Tinka	Brittany Spaniel	7	1	1.3	2	1	1	4	2	3	2	2	0	2	0	2	2							1.6	1.4	1.75	2
1	1406	09.15.2007 3:43 PM	Venja	Brittany Spaniel	7	1	0.7	2	0	2	3	2	3	2	2	0	1	0	2	2							0.6	1.8	1.75	1.33
2	64845	08.31.2008 5:59 PM	Wanda	Brittany Spaniel	7	1	10	2	0	0	4	2	3	2	2	0	2	1			0	1	3	1	1	1					0.5
1	1932	09.19.2007 4:10 PM	yolanda	Brittany Spaniel	7	1	2	2	1	0	4	2	2	3	1	0	1	1	2	2							0.8	1.4	1.25	0.67
1	13972	01.08.2008 10:33 AM	Adolf	Bull Terrier	3	1	4	1	0	3	1	1	3	1	3	2	2	0	2	1							0	0.4	0	1.33
1	7307	11.06.2007 3:11 PM	Aischa	Bull Terrier	3	1	7	2	1	3	3	1	3	2	1	0	2	0	2	1							1.2	0.4	1.75	2
1	11957	12.15.2007 8:53 AM	alfred	Bull Terrier	3	1	3	1	1	3	4	1	3	4	2	2	1	1	2	2							1.6	1.2	1.25	2
1	12699	12.26.2007 12:55 AM	alice	Bull Terrier	3	1	13	2	1	1	2	1	3	3	1	2	1	1	2	2							1.8	1.2	0.5	1.33
2	60673	08.12.2008 8:35 AM	Amy	Bull Terrier	3	1	1.5	2	0	3	2	2	3	3	2	2	1	2			0	1	2	1	1	1					0.75
2	84946	12.02.2008 11:05 AM	Anjali	Bull Terrier	3	1	1	2	0	0	2	2	2	1	3	0	2	2			0	2	2	2	1	0					0.5
2	61445	08.14.2008 8:32 PM	Anton	Bull Terrier	3	1	8	1	1	3	4	2	3	2	2	2	1	1			0	1	2	1	0	1					0.17
1	4332	10.12.2007 9:31 PM	Balu	Bull Terrier	3	1	1.2	1	0	1	2	2	2	4	3	0	1	0	1	1							1	1.4	0.75	2
1	4119	10.10.2007 4:10 PM	Belana	Bull Terrier	3	1	1.4	2	1	1	4	2	3	2	3	1	2	2	1	2							1	1	1.5	0.67
2	60663	08.12.2008 7:19 AM	Bud	Bull Terrier	3	1	1	1	1	2	2	2	3	2	1	0	1	3			0	1	2	1	0	1					0.92
1	8232	11.16.2007 2:41 AM	buddy	Bull Terrier	3	1	0.9	1	0	0	3	2	2	2	2	0	2	0	2	2							0.6	1.6	1.75	2
1	3626	10.05.2007 3:49 PM	buddy	Bull Terrier	3	1	3.5	1	1	0	3	2	2	4	2	1	1	1	2	1							0.2	1.2	1	1.33
1	11873	12.13.2007 10:49 PM	can	Bull Terrier	3	1	6	1	1	0	2	2	2	3	2	0	3	0	1	2							1	1.4	1.75	2
2	54915	07.15.2008 12:17 PM	Castro	Bull Terrier	3	1	2	1	1	0	2	2	2	2	2	0	1	2			0	2	2	2	1	1					0.67
2	90384	12.24.2008 3:56 PM	cindy	Bull Terrier	3	1	11	2	1	2	3	2	3	3	2	0	1	2			0	2	1	1	1	0					1
1	8600	11.19.2007 1:23 PM	Coco	Bull Terrier	3	1	4	1	0	3	3	1	3	2	2	0	1	2	1	1							1.4	1.4	1	1.67
1	4804	10.17.2007 8:33 AM	Ernie	Bull Terrier	3	1	0.8	1	1	3	3	2	3	1	3	0	1	2	2	2							1	1.2	1.25	2
2	92251	01.05.2009 7:10 PM	Fifty Cent	Bull Terrier	3	1	2	1	1	1	3	2	2	2	2	0	1	0			0	1	2	1	1	0					1.17
1	12632	12.24.2007 3:35 PM	frida	Bull Terrier	3	1	2	2	0	1	2	1	2	3	3	0	2	1	2	2							1.8	2	1.75	2
2	60805	08.12.2008 6:15 PM	Frida	Bull Terrier	3	1	3	2	1	1	3	2	3	2	3	1	1	3			1	1	3	2	1	1					0.42
1	5994	10.26.2007 3:46 PM	Glomm	Bull Terrier	3	1	3	2	0	3	2	2	3	4	2	2	2	3	1	2							0.2	1	2	1
1	13763	01.06.2008 1:22 PM	hector	Bull Terrier	3	1	1	1	0	0	3	2	2	1	3	0	3	0	2	1							1.4	1.6	1.75	1.67
1	7929	11.12.2007 7:44 PM	kezban s	Bull Terrier	3	1	0.3	2	0	0	2	1	2	1	2	0	3	0	2	2							1.2	1	1	1
2	60704	08.12.2008 11:12 AM	Lara	Bull Terrier	3	1	11	2	1	2	2	2	3	3	3	1	1	0			1	1	1	1	0	1					1
1	5544	10.23.2007 4:47 PM	lola	Bull Terrier	3	1	10	2	1	0	3	2	3	2	2	0	1	3	1	1							1.8	1.8	1.75	2
2	86596	12.09.2008 9:27 PM	lotte	Bull Terrier	3	1	1	2	0	3	2	1	4	4	3	0	1	1			1	2	1	1	0	0					0.5
1	13108	12.30.2007 5:28 PM	lucky	Bull Terrier	3	1	7	1	0	0	2	1	2	2	3	0	2	3	2	2							1.6	1.6	2	2
2	60403	08.10.2008 7:54 AM	Momo	Bull Terrier	3	1	3	1	1	3	3	2	3	2	2	1	2	3			0	2	1	1	0	0					0.67
1	12125	12.17.2007 11:11 AM	rosso	Bull Terrier	3	1	2	1	0	1	3	1	3	1	2	0	2	1	1	1							1	1.4	1	1.33
1	10823	12.05.2007 9:00 PM	shani	Bull Terrier	3	1	0.9	2	0	1	2	2	3	4	3	0	1	2	2	2							1.8	1.8	2	2
1	13314	01.02.2008 8:05 AM	Tequila	Bull Terrier	3	1	0.5	1	0	0	3	2	3	2	2	0	1	0	2	1							1.6	1.6	2	1.67
2	60787	08.12.2008 5:19 PM	Vincent	Bull Terrier	3	1	4	1	1	3	1	2	3	2	2	2	1	0			0	1	1	2	0	1					0.67
2	94483	01.16.2009 12:20 AM	willi	Bull Terrier	3	1	1.5	1	1	3	3	2	3	3	2	2	3	1			0	1	2	1	1	0					0.5
2	60783	08.12.2008 5:07 PM	wolle	Bull Terrier	3	1	2	1	0	3	1	1	3	2	2	2	2	0			0	2	1	2	1	0					0.75
2	73522	10.12.2008 9:01 PM	zara	Bull Terrier	3	1	3	2	1	1	2	2	3	1	2	0	2	3			0	1	2	1	0	0					0.58
2	57406	07.25.2008 12:14 PM	Adele	Bulldog	2	1	1	2	0	3	2	1	3	3	2	0	1	1			0	2	1	1	1	0					0.5
2	71473	10.03.2008 10:52 PM	Allana	Bulldog	2	1	1	2	0	2	3	2	3	2	3	0	1	1			1	1	2	1	1	0					0.08
1	7848	11.12.2007 8:54 AM	Amelie	Bulldog	2	1	1	2	0	2	2	2	2	4	2	0	2	1	1	2							1.4	1.6	2	1.67
1	7934	11.12.2007 10:19 PM	AMELIE	Bulldog	2	1	1	2	0	3	2	1	2	4	2	0	1	1	2	2							0	1.4	1.75	1.67
2	67787	09.16.2008 8:36 AM	Andrea Ofenloch	Bulldog	2	1	2	2	1	3	2	2	3	3	3	2	2	3			1	2	2	1	0	1					0.5
2	68112	09.17.2008 2:17 PM	Anton	Bulldog	2	1	1.8	1	0	0	3	2	3	2	2	0	2	1			0	1	1	2	1	1					0.92
1	7513	11.08.2007 3:46 PM	Ares	Bulldog	2	1	1	1	0		2	1	2	2	2	0	2	0	2	2							1.4	1.4	2	1.67
1	13037	12.29.2007 9:24 PM	Arthus	Bulldog	2	1	1	1	0	1	2	1	2	2	3	0	2	0	1	2							1.8	1.8	1	1.33
1	9244	11.24.2007 9:44 PM	bailey	Bulldog	2	1	2.5	1	0	3	3	1	2	4	2	0	2	2	2	2							2	1.6	0	1
1	10194	12.01.2007 5:54 PM	Billy	Bulldog	2	1	4	1	0	0	2	1	3	3	3	2	1	0	1	2							1.8	1.4	1.5	2
1	2044	09.19.2007 10:22 PM	Bo	Bulldog	2	1	2	1	0	3	2	2	2	1	3	1	2	0	2	2							1.8	1.6	2	2
1	13139	12.30.2007 9:36 PM	boris	Bulldog	2	1	1	1	0	1	2	2	3	2	3	0	1	0	2	2							1.8	2	2	1.67
1	8541	11.18.2007 9:07 PM	Bruno	Bulldog	2	1	0.6	1	0	1	2	2	2	3	2	0	2	0	2	2							1	1	2	2
1	281	08.30.2007 6:31 PM	Bruno	Bulldog	2	1	2	1	0	0	2	1	2	3	2	0	2	0	2	1							0.2	0.6	1.75	1.67
2	64971	09.01.2008 12:37 PM	Bruno	Bulldog	2	1	0.7	1	0	2	3	1	3	4	2	0	2	1			0	1	2	2	1	1					0.58
1	373	08.31.2007 9:22 PM	bruns	Bulldog	2	1	0.3	1	0	3	2	1	3	1	2	2	3	2	1	2							2	2	1.75	2
2	54320	07.11.2008 12:13 PM	Buffy	Bulldog	2	1	3.75	2	1	2	3	2	3	1	1	0	2	1			0	1	2	1	1	0					0.83
1	9630	11.27.2007 3:53 PM	buliwyf	Bulldog	2	1	1	1	0	0	3	1	2	3	2	0	2	0	2	2							1.6	1	2	2
1	11513	12.10.2007 9:26 PM	Carlos	Bulldog	2	1	5	1	1	1	4	1	3	3	3	0	2	0	1	2							1.2	0.8	0.75	1
1	9911	11.29.2007 1:36 PM	Cassy	Bulldog	2	1	6	2	0	0	2	2	2	4	3	0	2	1	2	1							2	1.8	1	2
2	92456	01.06.2009 9:41 PM	chiko	Bulldog	2	1	0.3	1	0	0	3	1	1	2		0	1	0			1	1	2	1	1	0					0.83
1	497	09.03.2007 6:43 PM	Chilli	Bulldog	2	1	0.4	2	0	3	2	2	2	2	2	2	1	0	2	2							2	1.4	1.5	2
2	70174	09.28.2008 12:55 PM	danger	Bulldog	2	1	2	1	1	0	2	1	2	1	1	0	2	0			0	1	3	1	1	1					0.42
1	10133	12.01.2007 10:08 AM	daVinci	Bulldog	2	1	0.9	1	0	1	2	2	3	2	3	0	2	0	2	2							0.2	0.6	2	1
1	2347	09.22.2007 2:32 PM	Doggy	Bulldog	2	1	0.3	1	0	0	2	1	2	1	3	0	1	0	2	2							1.2	0.4	1.5	0
2	54309	07.11.2008 11:02 AM	Donna	Bulldog	2	1	2.5	2	0	3	2	2	3	3	3	1	3	0			1	1	2	1	1	0					1.08
1	13478	01.03.2008 6:57 PM	einstein	Bulldog	2	1	1.5	1	0	0	3	1	3	1	1	0	3	0	2	2							1.8	1	2	2
2	87243	12.11.2008 9:01 PM	elli	Bulldog	2	1	1	2	0	2	2	2	3	2	3	2	1	1			1	1	1	1	1	1					1.5
2	68206	09.17.2008 8:07 PM	elli	Bulldog	2	1	2	2	0	2	2	1	3	1	3	0	2	2			1	2	2	1	0	1					0.42
1	1713	09.18.2007 12:34 PM	elvis	Bulldog	2	1	3	1	0	0	2	2	3	3	3	0	1	0	2	1							1.4	1.4	1.75	2
1	7223	11.05.2007 5:35 PM	emily	Bulldog	2	1	1	2	0	2	2	2	2	3	3	2	2	1	2	2							0.4	1.2	1.75	2
1	2708	09.26.2007 2:27 PM	Emily	Bulldog	2	1	5	2	0	2	4	2	2	2	1	0	2	1	2	2							1.2	1	0.5	1.33
1	7586	11.09.2007 11:29 AM	Emma	Bulldog	2	1	0.5	2	0	1	2	2	2	2	2	0	1	1	2	2							1.4	1.8	1.25	2
1	7369	11.07.2007 10:41 AM	Emma	Bulldog	2	1	0.6	2	0	0	3	2	3	3	3	0	1	0	2	2							2	1.6	2	1.33
1	9380	11.25.2007 9:48 PM	emma	Bulldog	2	1	0.9	2	0	2	3	1	3	3	2	1	1	0	2	2							1.2	1.2	1.75	1
1	4075	10.10.2007 10:35 AM	Emma	Bulldog	2	1	2	2	0	0	2	2	3	2	2	0	2	2	2	2							1.2	1.2	1.5	2
1	11970	12.15.2007 1:13 PM	Emma	Bulldog	2	1	11	2	0	3	2	1	3	4	2	2	1	0	2	2							1.8	1.2	1.75	2
2	57367	07.25.2008 10:24 AM	Emma	Bulldog	2	1	1.3	2	0	3	2	2	3	2	2	1	2	2			0	1	2	1	0	1					0.25
2	86886	12.10.2008 8:54 PM	emma	Bulldog	2	1	1.5	2	0	2	2	2	2	1	2	0	2	1			0	1	3	1	1	1					0.83
1	11236	12.08.2007 8:06 PM	Engel	Bulldog	2	1	2	2	0	3	2	2	3	1	2	1	1	0	2	2							2	0.4	2	2
1	2014	09.19.2007 8:50 PM	frau knete	Bulldog	2	1	2.2	2	0	2	2	2	2	1	3	1	2	0	2	2							1	1.8	1	0.67
2	64863	08.31.2008 8:32 PM	Freezy	Bulldog	2	1	6	2	0	0	4	1	3	1	2	0	1	0			0	1	1	2	0	1					0.92
2	67066	09.11.2008 8:35 PM	h?chen	Bulldog	2	1	3	2	0	3	4	2	3	2	3	0	1	0			1	1	2	2	1	0					0.75
1	4816	10.17.2007 10:33 AM	Heinz-Er	Bulldog	2	1	0.4	1	0	0	2	1	2	2	2	0	1	0	2	2							0.8	1.2	1.5	2
1	10336	12.02.2007 4:32 PM	Helga	Bulldog	2	1	5	2	1	0	3	2	2	3	1	0	1	1	2	2							0.6	1.4	2	1.67
2	55315	07.16.2008 6:19 PM	Hermann	Bulldog	2	1	0.8	1	0	0	3	2	3	2	3	0	2	1			0	1	2	2	1	1					0.75
1	12774	12.26.2007 11:22 PM	hund	Bulldog	2	1	6	2	1	0	2	1	3	3	2	0	1	1	2	2							2	1.2	2	1.67
2	60833	08.12.2008 9:57 PM	hunter	Bulldog	2	1	2	1	0	3	3	2	3	2	3	1	1	0			1	2	1	2	0	0					0.33
1	1546	09.16.2007 10:07 PM	jovi	Bulldog	2	1	2	1	1	0	3	2	3	4	1	0	2	2	2	2							0.8	2	1	1.67
2	67083	09.11.2008 10:43 PM	kerstin	Bulldog	2	1	2	1	0	1	2	2	3	1	3	1	1	0			0	1	2	1	1	1					0.92
2	74317	10.15.2008 10:07 PM	knete	Bulldog	2	1	3	2	1	2	2	2	2	2	3	1	2	0			1	1	2	1	1	1					0.75
1	8117	11.14.2007 10:02 PM	Knödel	Bulldog	2	1	7	1	1	3	3	2	3	2	2	2	2	1	2	1							1.8	2	0.75	2
1	5363	10.22.2007 7:58 AM	Krümel	Bulldog	2	1	0.8	1	0	1	2	2	2	3	3	1	2	2	2	2							2	1.8	1.75	1.67
2	55223	07.16.2008 11:25 AM	Lara	Bulldog	2	1	3	2	0	3	4	2	3	4	3	1	1	0			1	2	2	1	0	0					0.75
2	53106	07.06.2008 11:02 AM	Lola	Bulldog	2	1	1	2	0	2	3	2	2	3	2	0	2	1			0	1	2	1	0	0					0.67
1	11730	12.12.2007 5:07 PM	Lou	Bulldog	2	1	4	1	0	1	2	1	3	2	2	0	1	1	2	2							2	1.2	1.25	1
2	69184	09.23.2008 2:34 AM	Luna	Bulldog	2	1	1	2	0	0	2	2	2	1	2	0	3	2			0	1	2	1	1	0					0.92
1	1205	09.13.2007 2:36 PM	Luzie	Bulldog	2	1	0.5	2	0	1	2	2	2	2	2	0	2	2	1	2							1.4	1	1.75	2
2	91871	01.02.2009 7:59 PM	Maggie	Bulldog	2	1	1.5	2	1	0	3	2	2	4	1	0	1	3			0	1	2	1	0	0					0.75
2	73543	10.12.2008 9:50 PM	Maggy	Bulldog	2	1	2.5	2	0	2	3	2	3	2	1	0	1	0			0	1	2	2	1	1					0.83
1	4272	10.12.2007 9:07 AM	memy	Bulldog	2	1	7	2	0	1	2	2	2	1	3	0	1	0	2	1							2	1.2	1.75	1
1	9337	11.25.2007 6:16 PM	Molly	Bulldog	2	1	0.9	2	0	3	3	2	2	2	2	0	1	2	2	1							0.8	0.6	2	0
1	2029	09.19.2007 9:08 PM	Moppili	Bulldog	2	1	2	1	0	0	3	1	2	3	2	0	2	0	1	2							0	1.6	2	1.67
1	9023	11.22.2007 8:57 PM	Moses	Bulldog	2	1	3	1	0	2	2	2	3	2	1	0	1	1	2	1							1.2	1.2	2	2
2	60340	08.09.2008 9:51 PM	Nelly	Bulldog	2	1	2	2	1	1	3	2	3	2	2	1	2	2			0	1	2	1	1	1					0.67
2	54977	07.15.2008 3:37 PM	Nelly	Bulldog	2	1	3	2	1	0	2	2	3	3	1	0	1	3			0	3	2	1	1	1					0.42
2	89447	12.19.2008 6:52 PM	Nicole	Bulldog	2	1	0.5	2	0	0	2	2	3	3	2	0	2	1			0	1	2	2	1	0					0.92
1	2192	09.20.2007 7:38 PM	Nilsa	Bulldog	2	1	1	1	0	0	2	1	2	1	1	0	2	1	2	2							1.6	1.6	2	2
1	10332	12.02.2007 3:43 PM	Oscar	Bulldog	2	1	0.9	1	0	0	2	1	2	1	2	1	1	0	2	2							2	1.8	2	1.67
2	54974	07.15.2008 3:19 PM	P?bel	Bulldog	2	1	7	1	0	0	3	2	3	4	1	0	1	0			0	1	2	1	0	1					0.67
2	54563	07.13.2008 7:00 AM	Paco	Bulldog	2	1	2	1	1	0	2	1	3	1	2	0	2	2			0	1	2	2	0	1					0.42
1	7052	11.04.2007 11:46 AM	Paul	Bulldog	2	1	10	1	0	3	2	1	3	2	2	0	1	0	2	2							2	1	2	1.33
1	12176	12.17.2007 10:15 PM	rambo	Bulldog	2	1	0.2	1	0	3	2	1	3	1	3	0	2	0	1	1							0.8	0.6	1	2
1	10504	12.03.2007 5:24 PM	Rocky	Bulldog	2	1	0.3	1	0	3	2	1	2	1	3	1	2	0	2	2							2	2	2	2
1	1438	09.15.2007 7:47 PM	rocky	Bulldog	2	1	7	1	1	3	2	1	3	3	2	2	1	0	2	2							2	0.4	1.5	2
1	10906	12.06.2007 2:35 PM	Rothschild	Bulldog	2	1	1	1	0	2	2	2	3	3	2	1	2	0	1	2							0.4	2	1.5	2
1	8142	11.15.2007 10:18 AM	Rudi	Bulldog	2	1	7	1	0	3	2	2	3	3	3	1	1	2	2	2							2	2	1.5	2
1	2263	09.21.2007 1:05 PM	Sally	Bulldog	2	1	1	2	0	0	2	2	2	2	2	0	2	1	2	2							1.4	1.4	2	2
2	67024	09.11.2008 6:21 PM	Sally	Bulldog	2	1	1	2	0	0	2	2	2	3	2	0	1	1			0	2	2	1	1	1					0.58
2	93254	01.10.2009 6:48 PM	Schandl	Bulldog	2	1	2	2	1	1	2	1	3	3	2	1	3	0			0	2	2	2	1	0					1.08
1	7329	11.06.2007 4:59 PM	Scholtysik	Bulldog	2	1	1.2	2	0	3	2	2	2	3	3	1	1	0	2	2							1.2	1	1.75	0.67
1	3520	10.04.2007 6:58 PM	Schrecki	Bulldog	2	1	0.3	1	0	0	2	1	2	2	2	0	2	1	2	2							1.2	0.8	2	2
1	4955	10.18.2007 3:14 PM	shella	Bulldog	2	1	1.4	2	0	0	2	2	2	2	3	0	1	0	1	2							1.2	0.4	1.25	2
1	8939	11.22.2007 9:52 AM	Sissi	Bulldog	2	1	0.3	2	0	1	2	1	4	4	3	0	1	0	1	2							0.8	1.6	1	2
2	60667	08.12.2008 8:04 AM	Sissi	Bulldog	2	1	2.5	2	0	3	2	2	3	2	2	2	1	0			0	1	1	1	1	0					0.75
1	8442	11.17.2007 9:21 PM	speik	Bulldog	2	1	0.2	1	0	2	2	1	3	1	3	1	3	0	2	2							1.4	1.8	2	2
1	7351	11.07.2007 12:09 AM	Spike	Bulldog	2	1	0.5	1	0	1	3	2	2	2	2	0	1	1	2	2							1.2	0.4	2	2
1	2481	09.24.2007 10:37 AM	Spike	Bulldog	2	1	3	1	0	3	2	2	3	2	3	1	2	2	2	2							2	1.8	1.5	2
1	13020	12.29.2007 8:03 PM	Spike	Bulldog	2	1	3.9	1	0	0	2	1	2	2	3	0	2	0	2	2							1	2	1.5	1.33
2	55204	07.16.2008 11:20 AM	Spike	Bulldog	2	1	1.5	1	0	1	2	1	2	2	3	1	2	1			1	1	2	1	1	1					0.75
1	1634	09.17.2007 8:01 PM	Stefanie	Bulldog	2	1	1	1	0	1	2	2	2	3	2	0	2	2	2	2							1.6	1.6	2	1.67
2	57304	07.24.2008 9:04 PM	Sullivan	Bulldog	2	1	3	1	0	2	2	2	2	2	2	1	1	2			0	1	1	1	0	1					0.42
1	39	08.28.2007 10:30 PM	Tyson	Bulldog	2	1	6	1	0	3	2	2	3	3	3	0	1	2	2	2							2	2	1.5	2
2	90523	12.25.2008 8:20 PM	tyson	Bulldog	2	1	0.3	1	0	1	3	1	2	1	2	0	1	0			0	1	2	1	1	0					1.33
1	7536	11.08.2007 6:36 PM	wiggal	Bulldog	2	1	3	1	0	0	2	2	3	2	3	0	1	0	2	2							0.6	1	0.75	2
2	56783	07.23.2008 7:05 AM	Wilma	Bulldog	2	1	1.2	2	0	0	2	2	3	2	2	0	2	2			0	1	2	1	1	1					0.67
2	92444	01.06.2009 7:01 PM	zgzz	Bulldog	2	1	2	2	0	0	4	1	2	2	3	0	2	2			1	1	2	2	1	1					0.5
2	73464	10.12.2008 1:31 PM	Aron	Bullmastiff	2	1	2	1	0	3	2	1	3	3	3	0	1	0			0	2	1	1	1	0					1.17
2	60468	08.10.2008 8:03 PM	Bill	Bullmastiff	2	1	8	1	0	1	4	1	3	1	2	0	1	1			0	1	1	1	1	0					1.17
1	8505	11.18.2007 6:02 PM	Birgit hennig	Bullmastiff	2	1	1	1	0	1	2	1	3	2	2	1	2	2	2	2							2	1.4	1.5	2
2	60314	08.09.2008 4:53 PM	buffy	Bullmastiff	2	1	8.5	2	1	3	3	2	3	1	2	0	1	3			0	1	1	1	0	0					0.5
2	60328	08.09.2008 7:19 PM	Cathy	Bullmastiff	2	1	3	2	0	3	2	2	3	2	2	1	3	3			0	3	2	1	0	0					0.33
1	639	09.06.2007 5:07 PM	Chica	Bullmastiff	2	1	0.4	2	0	3	2	2	3	3	1	0	2	2	2	2							2	1.6	2	1.67
2	67514	09.14.2008 7:24 PM	chico	Bullmastiff	2	1	0.4	1	0	0	2	1	2	2	2	0	1	1			0	1	1	1	1	0					1
2	59423	08.05.2008 3:48 PM	dicker	Bullmastiff	2	1	3	1	0	2	2	1	3	2	2	1	1	0			0	2	2	1	0	1					0.5
2	73123	10.10.2008 5:16 PM	Emma	Bullmastiff	2	1	4	2	0	3	2	2	3	2	3	2	3	3			0	3	2	2	0	0					0.25
2	61484	08.15.2008 12:44 AM	Frido	Bullmastiff	2	1	0.3	1	0	0	2	2	2	2	2	0	1	1			0	1	1	1	1	0					0.83
2	60904	08.13.2008 12:27 PM	Hagen	Bullmastiff	2	1	0.7	1	0	1	2	2	2	4	2	1	2	1			0	2	2	1	0	0					0.67
2	60472	08.10.2008 8:59 PM	Hermann	Bullmastiff	2	1	7	1	1	3	2	2	3	4	2	2	2	2			0	1	2	2	0	0					0.17
2	60346	08.09.2008 10:41 PM	Ike	Bullmastiff	2	1	1.4	1	0	2	3	1	3	1	3	0	2	2			1	2	2	1	1	0					0.75
1	12212	12.18.2007 2:08 PM	J?rg Ulrich	Bullmastiff	2	1	2	1	0	1	2	1	3	4	2	2	2	0	1	1							1.6	1.6	2	2
2	60523	08.11.2008 9:57 AM	Knut	Bullmastiff	2	1	1.7	1	0	3	2	2	3	4	2	1	2	1			0	1	2	1	0	0					0.67
2	62283	08.19.2008 6:34 AM	Kral	Bullmastiff	2	1	0.3	1	0	0	2	2	2	1	2	0	1	0			0	1	1	1	1	1					0.92
2	60406	08.10.2008 8:52 AM	Luna	Bullmastiff	2	1	9	2	1	3	2	2	3	4	3	0	2	3			1	1	1	1	0	0					0.42
2	62051	08.17.2008 7:44 PM	paula	Bullmastiff	2	1	6	2	1	2	2	2	3	1	1	1	2	0			0	1	2	1	1	0					1.17
2	56037	07.20.2008 5:40 PM	Portos	Bullmastiff	2	1	3.5	1	1	2	3	2	3	3	3	0	1	1			0	1	2	1	1	0					0.42
2	60335	08.09.2008 9:31 PM	Rocky	Bullmastiff	2	1	8.5	1	0	3	2	1	3	1	2	0	1	2			0	1	1	2	1	0					0.5
2	60409	08.10.2008 9:25 AM	Ronja	Bullmastiff	2	1	1	2	0	1	2	2	3	1	3	0	1	1			1	1	2	1	1	0					0.58
1	8548	11.18.2007 10:51 PM	Roxy	Bullmastiff	2	1	5	2	1	1	2	2	2	3	3	1	1	2	2	1							1.8	0.8	1.25	1.33
1	9029	11.22.2007 9:33 PM	Spike	Bullmastiff	2	1	0.2	1	0	0	2	2	2	1	3	0	2	0	2	2							1	1	0.5	2
1	7568	11.09.2007 7:53 AM	stubsi	Bullmastiff	2	1	4	1	0	1	3	1	2	2	3	0	2	2	1	2							2	1.6	1.5	0.67
1	2470	09.24.2007 8:29 AM	Suzy	Bullmastiff	2	1	1.5	2	0	3	3	2	3	4	2	0	1	3	2	2							2	1.4	1.5	0.67
1	9430	11.26.2007 11:34 AM	tara	Bullmastiff	2	1	0.4	2	0	0	4	2	2	3	2	0	2	0	2	2							1.8	1.4	1.75	0.67
2	60431	08.10.2008 1:47 PM	Tita	Bullmastiff	2	1	1.25	2	0	1	2	2	3	3	3	0	1	3			1	1	2	1	0	0					0.5
1	9817	11.28.2007 7:09 PM		Cairn Terrier	3	1	8	1	1	3	4	1	3	2	2	0	1	0	2	2							0.8	2	0.25	2
1	6851	11.02.2007 5:24 PM	Baggy	Cairn Terrier	3	1	6	2	1	1	2	2	3	1	2	0	1	3	2	2							1	1.8	0.75	1.33
1	12292	12.19.2007 10:27 AM	Bandit	Cairn Terrier	3	1	2	1	0	0	2	2	3	2	3	0	2	3	1	1							2	0.6	0.75	2
1	5672	10.24.2007 3:32 PM	benny	Cairn Terrier	3	1	0.8	1	1	1	2	2	2	4	3	0	1	0	2	2							0.8	1.6	1	2
2	72145	10.07.2008 6:43 PM	bobby	Cairn Terrier	3	1	10.5	1	1	0	4	1	3	3	2	0	1	0			0	1	2	1	1	0					0.83
2	66691	09.10.2008 10:49 AM	Boomer	Cairn Terrier	3	1	1.1	1	0	0	2	2	3	2	2	0	2	0			0	1	2	1	1	1					1.42
1	6754	11.01.2007 7:34 PM	Buffy	Cairn Terrier	3	1	5	1	0	0	4	2	3	1	3	0	1	0	1	2							1	1.8	0.25	2
1	577	09.05.2007 1:38 PM	Cairnie	Cairn Terrier	3	1	6	2	0	1	2	2	4	2	2	1	1	0	2	2							1.4	1.4	1.5	1.67
2	91563	01.01.2009 6:08 PM	Ccino	Cairn Terrier	3	1	2.7	1	0	1	3	2	2	4	2	1	2	2			0	1	2	1	1	1					0.92
2	78864	11.06.2008 10:14 AM	Daily	Cairn Terrier	3	1	2	1	1	2	2	2	3	4	2	0	2	2			0	1	2	2	1	1					0.58
1	4270	10.12.2007 8:52 AM	Elliot	Cairn Terrier	3	1	2	1	0	0	3	2	4	1	1	0	1	1	2	1							1.2	1.6	1.5	2
1	7799	11.11.2007 4:09 PM	Elsa	Cairn Terrier	3	1	14	2	1	1	4	2	2	2	2	0	1	2	2	2							2	1	1.5	1.67
1	12184	12.18.2007 1:12 AM	EmmaPeel	Cairn Terrier	3	1	2	2	0	3	3	2	3	2	2	0	1	0	2	2							2	1.8	1.75	1.33
2	76547	10.25.2008 12:49 PM	fenja	Cairn Terrier	3	1	12	2	1	1	3	2	1	2	3	0	1	0			0	2	2	1	1	1					0.58
1	9160	11.24.2007 10:34 AM	FIBI	Cairn Terrier	3	1	1.6	2	1	0	2	2	3	1	2	0	1	2	2	2							1	1.2	2	1.67
1	7424	11.07.2007 4:17 PM	Flora	Cairn Terrier	3	1	2	2	1	2	3	2	2	2	3	1	1	0	1	2							0.6	1	1.5	2
3	449	09.02.2007 5:44 PM	Freddy	Cairn Terrier	3	1	5	1	1	0	2	2	3	2	3	0	2	3	2	2	0	1	3	1	1	1	0	1.8	1	1	0.67
2	65063	09.02.2008 5:16 AM	friend	Cairn Terrier	3	1	10.5	1	1	1	2	2	3	4	3	0	1	2			0	1	2	1	0	1					0.58
1	8310	11.16.2007 7:38 PM	gini	Cairn Terrier	3	1	7	2	1	1	2	2	3	2	1	0	1	1	2	2							1.2	2	2	1
1	8617	11.19.2007 3:51 PM	Gipsy	Cairn Terrier	3	1	5	2	1	0	2	2	3	3	3	0	1	2	2	2							1.8	1.6	1.75	2
2	61523	08.15.2008 9:23 AM	Henry Pelle von den Seuten Snuddelbuddel	Cairn Terrier	3	1	1.3	1	0	1	2	1	3	3	2	0	2	0			0	1	2	2	1	0					0.75
1	12148	12.17.2007 4:54 PM	hugo	Cairn Terrier	3	1	5	1	1	2	2	2	1	2	3	1	1	3	2	1							1.4	0.4	1.5	0.67
2	56864	07.23.2008 12:39 PM	Insa	Cairn Terrier	3	1	11	2	0	0	2	2	1	2	3	0	2	0			0	1	2	1	1	0					0.92
2	64982	09.01.2008 1:33 PM	Jack	Cairn Terrier	3	1	8	1	1	3	4	2	4	2	2	0	1	0			0	1	2	1	0	0					0.42
1	10543	12.03.2007 8:32 PM	Jasper	Cairn Terrier	3	1	2	1	0	0	4	2	2	4	2	0	2	0	2	2							1.4	1.6	2	2
1	10356	12.02.2007 6:10 PM	jenny	Cairn Terrier	3	1	15.5	2	1	0	2	2	2	3	3	0	2	0	2	1							1.2	0.8	1.25	1.67
1	3923	10.08.2007 7:38 PM	Jimmy	Cairn Terrier	3	1	0.3	1	0	3	2	1	3	2	3	0	3	0	2	2							1.4	1.4	1.5	2
2	82687	11.21.2008 10:39 AM	Keeny	Cairn Terrier	3	1	6.5	2	1	0	2	2	4	2	1	1	2	3			0	1	2	1	0	0					0.25
2	69533	09.24.2008 6:22 PM	Lea	Cairn Terrier	3	1	2	2	1	0	2	2	3	3	3	0	1	2			1	1	2	1	1	0					0.83
2	94827	01.17.2009 5:36 PM	Liesl	Cairn Terrier	3	1	1	2	0	1	2	2	3	1	2	0	2	1			0	2	2	2	1	0					0.75
2	94828	01.17.2009 5:39 PM	Liesl	Cairn Terrier	3	1	4	2	0	1	2	1	4	3	2	0	1	1			0	1	2	1	1	0					0.583333
2	69250	09.23.2008 11:45 AM	Lilly	Cairn Terrier	3	1	3	2	1	2	3	2	3	3	3	1	1	0			0	2	2	2	1	1					1
2	61948	08.16.2008 6:56 PM	Lola	Cairn Terrier	3	1	1	2	0	3	2	2	2	3	2	0	1	0			0	1	2	2	1	1					0.67
1	6565	10.31.2007 1:04 PM	Lotta	Cairn Terrier	3	1	1.5	2	0	1	2	2	2	2	3	1	2	3	2	2							1	1.4	1.5	0.67
1	4664	10.16.2007 8:07 AM	Macho	Cairn Terrier	3	1	0.7	1	0	0	3	1	4	1	2	0	1	1	1	2							0.8	2	1.75	2
1	7134	11.05.2007 7:43 AM	Max	Cairn Terrier	3	1	0.6	1	0	0	2	1	3	3	3	0	1	0	2	2							1.4	1.8	1.75	1.33
1	1493	09.16.2007 3:43 PM	maxi	Cairn Terrier	3	1	5	2	0	0	2	2	3	2	3	0	1	1	2	2							2	1.6	1.5	2
2	79899	11.11.2008 12:40 PM	nelly	Cairn Terrier	3	1	8	2	0	0	2	2	3	3	3	1	2	2			0	2	2	1	0	0					0.92
2	92705	01.08.2009 10:39 AM	Nemo	Cairn Terrier	3	1	3	1	0	1	3	1	3	3	2	0	2	2			0	1	2	1	1	0					1.33
1	8509	11.18.2007 6:25 PM	Nico	Cairn Terrier	3	1	4	1	1	0	3	1	3	1	3	0	2	0	1	1							1.4	1	2	1.33
3	9264	11.25.2007 9:24 AM	Ole	Cairn Terrier	3	1	4.5	1	0	2	4	2	3	4	1	0	2	0	2	2	0	1	2	1	1	0	0.6	1.6	2	0.33	0.25
2	80503	11.13.2008 3:54 PM	Oskar	Cairn Terrier	3	1	13	1	0	0	2	2	3	3	2	0	2	0			0	2	2	1	0	0					1.42
1	9393	11.25.2007 10:15 PM	pearly	Cairn Terrier	3	1	2.5	2	0	1	3	2	3	3	3	0	1	0	1	1							1.8	1.6	2	0
2	53649	07.08.2008 5:31 PM	Pipilotti	Cairn Terrier	3	1	7.4	2	1	3	3	2	3	2	2	2	1	3			0	1	2	1	1	0					0.42
2	87404	12.12.2008 11:05 AM	Quinni	Cairn Terrier	3	1	7	2	0	0	2	1	3	1	2	0	1	1			0	1	3	1	1	1					1
2	80925	11.14.2008 6:43 PM	Quitte	Cairn Terrier	3	1	1.4	2	1	1	2	2	4	3	2	0	2	3			0	2	2	1	1	1					1.08
1	6295	10.29.2007 1:47 PM	Tana von Egereshausen	Cairn Terrier	3	1	13	2	1	0	4	1	3	3	2	0	1	0	1	1							0.2	0.4	0.25	1.67
3	11966	12.15.2007 11:39 AM	Teddy	Cairn Terrier	3	1	4	1	1	0	3	2	3	4	2	0	1	3	2	1	0	2	2	1	1	0	1.6	2	1.75	2	0.75
2	82964	11.22.2008 9:12 AM	Tequilla	Cairn Terrier	3	1	1.75	1	1	1	2	2	4	1	1	1	2	2			0	1	2	1	0	0					0.92
2	53498	07.08.2008 2:14 PM	thessa	Cairn Terrier	3	1	7	2	0	1	2	2	3	2	3	0	1	2			0	1	2	2	1	0					0.25
2	54880	07.15.2008 9:46 AM	tina	Cairn Terrier	3	1	1	1	0	1	2	1	4	1	2	0	2	0			0	2	2	1	1	0					1.83
1	10816	12.05.2007 8:28 PM	tonia	Cairn Terrier	3	1	5	2	0	3	4	2	3	1	2	0	1	1	2	2							2	0.8	1.5	1.33
1	4757	10.16.2007 6:08 PM	Waldina	Cairn Terrier	3	1	5	2	1	0	3	2	2	4	3	1	2	1	2	2							1	1.4	1.25	2
1	657	09.06.2007 9:01 PM	Whisky	Cairn Terrier	3	1	12	1	0	0	2	2	3	2	2	0	1	0	2	1							0.2	1.4	0.5	1
2	56725	07.22.2008 8:12 PM	Winnetou	Cairn Terrier	3	1	3	1	0	1	2	2	3	2	2	0	1	3			0	1	2	1	1	1					0.5
1	13229	01.01.2008 12:44 AM	Zaira	Cairn Terrier	3	1	14.8	2	0	2	2	2	3	3	2	2	2	3	2	2							1.8	2	2	2
1	11566	12.11.2007 1:01 PM	Caspar	Canaan Dog	5	1	3	1	1	3	4	2	2	2	2	2	2	1	2	2							0.2	1.6	0.75	1.67
2	80523	11.13.2008 5:08 PM	Chios	Canaan Dog	5	1	1	1	0	1	2	1	3	4	3	0	1	0			1	1	2	2	1	0					0.67
1	12106	12.16.2007 10:00 PM	laika	Canaan Dog	5	1	1.5	2	1	3	4	2	3	1	2	0	2	1	2	2							1	1.2	1.75	1.33
2	64256	08.27.2008 9:42 PM	Rico	Canaan Dog	5	1	1.3	1	1	0	2	2	3	1	3	0	2	2			0	2	2	1	1	0					0.83
1	11844	12.13.2007 4:17 PM	Selima	Canaan Dog	5	1	3	2	1	0	4	1	3	4	2	0	2	0	1	2							0.2	0.8	1	0
1	4243	10.11.2007 9:45 PM	Takeru	Canaan Dog	5	1	2	1	1	1	2	2	2	2	3	1	1	2	2	2							1.4	2	2	1
1	2105	09.20.2007 11:08 AM	betty	Canarian Warren Hound	5	1	9	2	1	2	3	2	3	2	1	1	2	2	1	1							0.4	1.6	0.25	0.67
3	50	08.29.2007 8:53 AM	Kepri	Canarian Warren Hound	5	1	4	2	1	3	4	2	3	2	2	0	2	2	2	2	0	1	2	1	0	1	2	1.8	2	2	0.33
1	1911	09.19.2007 3:16 PM	Luna	Canarian Warren Hound	5	1	10	2	0	1	4	2	3	3	2	1	1	0	2	1							2	0	2	2
2	57949	07.28.2008 8:28 PM	Matti	Canarian Warren Hound	5	1	0.75	1	0	1	3	2	3	2	2	0	2	3			0	2	1	2	0	0					1.25
1	10561	12.03.2007 9:27 PM	Ninja	Canarian Warren Hound	5	1	6	2	1	0	4	2	3	2	1	0	2	3	2	2							0.8	0.8	2	0.33
1	6878	11.02.2007 9:39 PM	Octavo	Canarian Warren Hound	5	1	3	1	1	0	4	2	3	2	2	0	2	2	2	2							0.4	1.8	2	0.67
2	59568	08.06.2008 11:39 AM	Tara	Canarian Warren Hound	5	1	3.5	2	1	1	3	2	3	3	3	2	2	1			0	1	2	1	1	0					0.83
2	67374	09.13.2008 12:44 PM	jule	Castro Laboreiro Dog	2	1	1	2	1	3	3	2	3	2	2	0	1	0			0	1	3	2	0	1					0.75
2	53163	07.06.2008 5:00 PM	Preto	Castro Laboreiro Dog	2	1	6	1	1	3	3	2	3	4	3	2	1	3			1	1	2	1	0	0					0.5
2	60869	08.13.2008 8:38 AM	Thyson	Castro Laboreiro Dog	2	1	0.75	1	0	2	3	2	2	2	3	1	1	1			1	1	3	1	1	0					0.25
2	69124	09.22.2008 5:15 PM	Jackie	Catahoula Cur	-	1	0.8	2	0	3	2	2	3	4	1	1	2	2			0	1	2	1	0	1					0.33
1	2896	09.28.2007 2:13 PM	Chayenne	Catalan Sheepdog	1	1	0.5	2	0	1	3	2	2	2	3	0	2	2	2	2							2	1.6	1.75	1.33
1	12073	12.16.2007 6:29 PM	Dona	Catalan Sheepdog	1	1	0.5	2	0	3	2	2	4	2	1	0	2	1	2	2							1	2	2	2
1	157	08.29.2007 8:39 PM	Gino	Catalan Sheepdog	1	1	7	1	1	0	4	2	2	2	2	0	2	0	2	1							1.6	0.8	1.25	1
1	7797	11.11.2007 3:39 PM	hase	Catalan Sheepdog	1	1	2	2	1	1	3	2	3	3	2	0	1	2	2	2							0.2	1.8	2	2
1	9949	11.29.2007 6:12 PM	Lisa	Catalan Sheepdog	1	1	2	2	1	3	4	2	3	4	1	0	1	0	1	2							0.8	1.2	0.5	0.33
1	12423	12.20.2007 7:55 PM	Lucy	Catalan Sheepdog	1	1	2.5	2	1	0	2	2	3	3	3	0	1	3	1	2							0	1.8	0	2
2	80365	11.13.2008 10:48 AM	mio	Catalan Sheepdog	1	1	1.5	1	0	2	2	2	3	3	2	2	2	0			0	2	2	2	0	1					0.58
1	6862	11.02.2007 7:10 PM	Solino	Catalan Sheepdog	1	1	1.5	1	0	0	3	1	2	2	2	0	2	0	2	2							1.8	2	2	2
1	5191	10.20.2007 1:12 PM	Tammy	Catalan Sheepdog	1	1	9	2	0	2	2	2	1	2	3	1	1	0	1	1							1	0.8	2	0.33
1	10980	12.06.2007 10:15 PM	Ben	Caucasian Shepherd Dog	2	1	0.9	1	0	1	2	2	3	1	3	0	1	0	2	2							1.6	1.6	0.5	1.67
2	66452	09.08.2008 7:24 PM	Bruno	Caucasian Shepherd Dog	2	1	2	1	1	3	3	1	3	2	2	2	2	0			0	2	2	1	1	0					0.67
1	10869	12.06.2007 10:08 AM	Buddie	Caucasian Shepherd Dog	2	1	0.9	1	0	0	3	2	1	1	3	0	2	0	2	2							1.6	2	1.5	2
1	5777	10.25.2007 7:48 AM	Buffy	Caucasian Shepherd Dog	2	1	2	2	0	0	3	2	3	1	3	2	2	0	1	1							0.6	0.6	1	0.33
1	5550	10.23.2007 5:05 PM	Ciko	Caucasian Shepherd Dog	2	1	0.3	1	0	3	3	1	3	2	3	0	3	0	1	2							1.6	1.4	0.5	1.67
1	2031	09.19.2007 9:24 PM	Hektor	Caucasian Shepherd Dog	2	1	0.9	1	0	2	3	2	3	2	2	2	2	0	2	2							1.8	2	1	1.67
1	6722	11.01.2007 3:13 PM	Joe	Caucasian Shepherd Dog	2	1	1	1	0	2	4	1	3	2	3	0	1	0	2	2							1.6	0.8	0.5	0.67
1	8126	11.15.2007 12:47 AM	jorik	Caucasian Shepherd Dog	2	1	1	1	0	3	2	1	2	2	2	0	3	0	1	2							1.8	0.6	0.75	1.67
1	6197	10.28.2007 1:05 PM	Medno	Caucasian Shepherd Dog	2	1	3	1	1	3	2	1	3	2	3	0	1	2	2	2							0.4	0.8	1	0
2	71745	10.06.2008 1:14 PM	minow	Caucasian Shepherd Dog	2	1	1	2	0	3	2	2	3	2	2	2	2	0			0	1	3	1	0	0					0.67
2	95473	01.21.2009 3:35 PM	Pasha	Caucasian Shepherd Dog	2	1	10	1	1	1	4	2	3	2	1	2	3	0			0	3	2	1	0	0					1.33
1	11662	12.12.2007 4:05 AM	Rocky	Caucasian Shepherd Dog	2	1	2	1	0	0	3	1	2	3	2	1	2	3	2	2							2	1.6	1.25	2
1	5567	10.23.2007 6:42 PM	alma	Cavalier King Charles Spaniel	9	1	0.5	2	0	2	2	2	4	4	2	0	1	1	2	2							1.6	1.6	2	2
2	62576	08.20.2008 1:47 PM	Ammely	Cavalier King Charles Spaniel	9	1	3	2	0	3	2	2	3	3	3	2	2	0			1	1	1	2	1	0					0.25
2	58747	08.01.2008 1:26 PM	annika	Cavalier King Charles Spaniel	9	1	0.4	2	0	3	3	2	3	3	2	2	2	2			0	2	1	1	1	1					0.5
2	74457	10.16.2008 12:09 PM	Ayla	Cavalier King Charles Spaniel	9	1	1.25	2	0	0	2	2	3	1	3	0	1	2			1	1	2	1	1	0					0.58
2	66957	09.11.2008 12:23 PM	Bailey	Cavalier King Charles Spaniel	9	1	0.3	2	0	1	2	2	2	2	2	0	2	1			0	1	2	2	1	0					0.75
1	549	09.04.2007 8:51 PM	Bärle	Cavalier King Charles Spaniel	9	1	1	1	1	0	2	2	3	3	1	0	3	1	1	2							2	2	2	2
2	62388	08.19.2008 1:26 PM	Basil	Cavalier King Charles Spaniel	9	1	2	1	1	0	2	2	3	2	1	0	2	2			0	1	2	1	1	1					0.33
2	66844	09.10.2008 10:14 PM	Bentley	Cavalier King Charles Spaniel	9	1	2	1	0	1	2	2	2	1	2	0	1	1			0	1	2	2	1	1					0.17
1	11722	12.12.2007 4:21 PM	biene	Cavalier King Charles Spaniel	9	1	3.5	2	0	0	3	2	2	2	3	0	1	2	1	1							1.2	1.6	1.75	1.67
1	6811	11.02.2007 12:37 PM	Blitz	Cavalier King Charles Spaniel	9	1	5.5	1	0	3	3	2	3	2	1	1	2	1	2	1							1.4	1.4	2	1.67
1	5304	10.21.2007 3:50 PM	Bonny	Cavalier King Charles Spaniel	9	1	7	2	1	0	2	2	3	3	3	0	2	3	1	1							1.8	0.6	1.5	0.33
1	3190	10.01.2007 7:25 PM	Börger	Cavalier King Charles Spaniel	9	1	1	1	0	0	3	2	2	2	1	0	1	1	2	2							1.8	1.8	2	1.67
2	59266	08.04.2008 6:03 PM	carlos	Cavalier King Charles Spaniel	9	1	1.7	1	1	0	3	2	2	1	3	0	1	2			1	1	1	2	1	0					0.83
1	9954	11.29.2007 6:46 PM	Dandy	Cavalier King Charles Spaniel	9	1	5	1	0	3	2	2	4	4	1	2	2	0	2	2							1.2	1.8	1.5	2
2	90324	12.24.2008 8:44 AM	Diego	Cavalier King Charles Spaniel	9	1	0.9	1	0	0	2	1	3	3	2	0	2	2			0	1	3	1	1	1					1
2	59567	08.06.2008 11:37 AM	Diego	Cavalier King Charles Spaniel	9	1	1	1	0	1	3	1	3	2	2	0	2	2			0	1	2	1	0	1					0.75
1	4785	10.16.2007 9:41 PM	Dusty	Cavalier King Charles Spaniel	9	1	3	1	0	0	2	2	3	2	3	1	2	0	1	1							1.6	1.4	1.75	1
1	10987	12.06.2007 11:18 PM	Emily	Cavalier King Charles Spaniel	9	1	6	2	1	0	3	2	3	3	3	0	2	1	1	1							1	0.4	1.25	0
2	91805	01.02.2009 3:48 PM	emma	Cavalier King Charles Spaniel	9	1	1.2	2	0	2	2	2	4	2	2	0	2	1			0	1	1	1	1	1					0.75
2	64882	08.31.2008 9:27 PM	Fedli	Cavalier King Charles Spaniel	9	1	10	1	1	0	4	1	3	4	2	0	1	0			0	1	1	1	0	0					0.42
2	71672	10.05.2008 9:57 PM	Fleur	Cavalier King Charles Spaniel	9	1	4	2	0	3	1	2	3	2	3	1	1	1			0	1	2	1	0	1					0.42
3	11319	12.09.2007 3:05 PM	Flocke	Cavalier King Charles Spaniel	9	1	1.4	2	0	0	3	2	3	3	1	0	2	2	2	2	0	2	2	1	0	0	0.2	2	2	0	0.17
1	1689	09.18.2007 10:36 AM	Flora	Cavalier King Charles Spaniel	9	1	2	2	1	0	2	2	3	2	3	0	2	3	2	2							1	1.6	1.5	1.33
2	59683	08.06.2008 4:56 PM	frido	Cavalier King Charles Spaniel	9	1	1	1	0	0	2	2	4	3	2	0	1	2			0	1	3	1	0	0					0.75
2	64944	09.01.2008 8:36 AM	Gerg	Cavalier King Charles Spaniel	9	1	10	1	1	0	4	2	3	2	2	0	1	0			0	1	1	2	0	0					0.5
2	63378	08.23.2008 5:23 PM	godi	Cavalier King Charles Spaniel	9	1	0.4	1	0	1	3	2	3	3	3	0	2	1			1	1	2	2	1	0					0.83
2	73383	10.12.2008 1:11 AM	Good Boy	Cavalier King Charles Spaniel	9	1	4	1	0	1	2	2	3	2	2	2	1	0			0	1	1	2	1	1					0.92
1	4206	10.11.2007 4:49 PM	Harvey	Cavalier King Charles Spaniel	9	1	2.5	1	0	0	2	2	3	3	3	0	2	0	2	2							1	1.6	1.75	2
2	70596	09.30.2008 12:20 PM	Henry	Cavalier King Charles Spaniel	9	1	1.5	1	0	0	2	2	2	2	2	0	1	1			0	1	2	1	1	1					0.83
1	5310	10.21.2007 5:20 PM	Honeymoon in Hollywood	Cavalier King Charles Spaniel	9	1	5.5	2	1	1	2	2	4	2	1	0	2	2	2	2							1.8	1	2	1.33
1	12228	12.18.2007 3:46 PM	inki	Cavalier King Charles Spaniel	9	1	2	2	1	0	2	2	3	3	1	0	1	0	2	2							1.8	2	2	1.67
2	64823	08.31.2008 2:57 PM	Josy	Cavalier King Charles Spaniel	9	1	5	2	1	3	4	2	4	4	1	0	2	0			0	1	2	1	1	1					0.33
2	93026	01.09.2009 9:49 AM	Justus	Cavalier King Charles Spaniel	9	1	1.6	1	0	0	2	2	4	3	2	0	1	2			0	1	2	1	0	0					1.17
1	6082	10.27.2007 12:48 PM	Kassim vom Welfenhof	Cavalier King Charles Spaniel	9	1	2	1	1	0	3	2	2	2	3	0	1	0	2	2							1.4	1.8	1.25	1.67
2	65318	09.03.2008 11:48 AM	Kimani	Cavalier King Charles Spaniel	9	1	0.4	2	0	1	2	2	1	1	3	1	1	2			0	2	2	1	1	0					0.5
2	75168	10.18.2008 4:55 PM	Kyo	Cavalier King Charles Spaniel	9	1	0.6	1	0	0	3	2	2	3	2	0	2	0			0	1	2	1	1	0					0.92
1	5245	10.20.2007 10:53 PM	Lenni	Cavalier King Charles Spaniel	9	1	3.5	1	0	0	3	2	3	2	2	0	1	1	2	2							0.8	2	2	1.33
1	13908	01.07.2008 6:59 PM	lucky	Cavalier King Charles Spaniel	9	1	0.6	1	0	1	3	1	3	3	3	0	1	2	2	2							1.2	1.8	1.75	1
1	9990	11.29.2007 9:51 PM	Madita	Cavalier King Charles Spaniel	9	1	0.3	2	0	3	2	2	1	2	2	1	2	2	2	2							1.2	2	2	1
2	69596	09.25.2008 10:55 AM	Meeko	Cavalier King Charles Spaniel	9	1	9	1	1	3	2	2	3	4	3	1	2	3			0	1	2	1	1	0					0.33
2	53147	07.06.2008 2:42 PM	Merlin	Cavalier King Charles Spaniel	9	1	5	1	1	0	2	2	3	1	2	0	2	3			0	1	2	2	1	1					0.58
2	90765	12.27.2008 9:18 AM	monika Elsensohn	Cavalier King Charles Spaniel	9	1	2	2	0	1	2	2	3	3	3	1	2	2			0	1	1	1	0	1					1.25
2	73518	10.12.2008 8:42 PM	Ordry	Cavalier King Charles Spaniel	9	1	6	1	0	1	2	2	2	2	2	0	1	3			0	1	1	1	1	1					0.58
2	53945	07.09.2008 8:45 PM	Paul	Cavalier King Charles Spaniel	9	1	2	1	1	0	2	2	2	2	2	0	2	3			0	1	2	1	1	1					0.25
2	59030	08.02.2008 10:54 PM	Paul	Cavalier King Charles Spaniel	9	1	3	1	0	1	2	2	3	2	2	0	1	2			0	1	2	1	1	1					0.67
2	61131	08.14.2008 9:36 AM	paula	Cavalier King Charles Spaniel	9	1	1	2	0	2	2	2	3	3	2	0	1	2			0	2	1	2	1	1					1.08
1	6079	10.27.2007 12:15 PM	Pinocchi	Cavalier King Charles Spaniel	9	1	0.5	1	0	1	3	2	1	2	3	1	2	0	2	2							2	1.4	1.75	2
2	87807	12.14.2008 3:37 PM	Rejck	Cavalier King Charles Spaniel	9	1	0.8	1	0	1	2	2	3	4	3	0	1	1			0	1	2	1	1	0					1
2	61452	08.14.2008 9:32 PM	Robby	Cavalier King Charles Spaniel	9	1	2	1	0	2	3	2	3	4	3	0	2	3			0	2	2	1	0	1					0.92
2	54994	07.15.2008 5:31 PM	Sabine	Cavalier King Charles Spaniel	9	1	1.25	1	0	0	3	1	3	3	1	0	3	3			0	1	2	1	0	1					0.92
1	420	09.01.2007 11:55 PM	scooby	Cavalier King Charles Spaniel	9	1	1.5	1	1	1	3	2	3	2	3	0	1	1	2	2							0.8	2	1.75	1.67
1	765	09.08.2007 8:47 PM	Shary	Cavalier King Charles Spaniel	9	1	1	2	0	1	2	2	3	3	3	0	2	1	2	2							1.6	2	2	2
2	88308	12.16.2008 10:07 AM	shiva	Cavalier King Charles Spaniel	9	1	2	2	0	2	3	2	3	4	2	1	1	1			0	1	2	2	1	1					0.17
1	10406	12.02.2007 10:43 PM	Sina	Cavalier King Charles Spaniel	9	1	1	2	0	3	2	1	1	1	3	2	2	0	2	2							1.8	2	1.5	0.33
2	59849	08.07.2008 1:19 PM	Snoopy	Cavalier King Charles Spaniel	9	1	2	1	0	0	2	2	3	2	2	0	2	2			0	1	2	2	1	1					0.75
1	4852	10.17.2007 4:03 PM	tiffany	Cavalier King Charles Spaniel	9	1	1	2	0	0	3	2	1	1	3	0	2	1	2	2							1	1.2	1.5	1
1	3675	10.05.2007 10:12 PM	Timmy	Cavalier King Charles Spaniel	9	1	0.3	1	0	1	2	2	3	3	3	0	2	1	2	2							1.6	1	2	1.33
2	84144	11.27.2008 6:48 PM	tofie	Cavalier King Charles Spaniel	9	1	2.5	1	0	1	3	2	3	3	3	0	1	1			1	1	1	1	1	0					0.83
1	2324	09.22.2007 9:13 AM	tyson	Cavalier King Charles Spaniel	9	1	3	1	0	1	2	2	3	1	3	1	2	0	2	1							1.2	1.8	1.25	1.67
2	90803	12.27.2008 8:25 PM	Zidane	Cavalier King Charles Spaniel	9	1	1.25	1	0	0	2	2	3	2	1	0	3	1			0	1	2	1	1	1					0.83
1	2571	09.25.2007 9:53 AM	andra	Central Asian Shepherd Dog	2	1	2	2	0	2	2	1	2	1	3	0	1	0	2	2							1.2	1.2	2	1.33
1	13807	01.06.2008 6:25 PM	m?cke	Central Asian Shepherd Dog	2	1	3	1	0	1	4	2	3	2	2	1	2	1	2	2							1.6	1.2	1.25	2
2	83126	11.23.2008 10:32 AM	Pamuck	Central Asian Shepherd Dog	2	1	4	2	1	2	4	2	3	2	2	1	2	1			0	1	1	1	1	0					1.17
2	54997	07.15.2008 6:01 PM	Anouk	Cesky Terrier	3	1	2	1	0	1	3	2	2	3	2	1	2	1			0	2	1	1	1	0					0.17
2	67229	09.12.2008 2:02 PM	Vanille	Cesky Terrier	3	1	4	2	0	1	2	2	3	2	3	0	1	2			1	1	1	1	1	1					0.67
1	28	08.28.2007 8:04 PM	Angus	Chesapeake Bay Retriever	8	1	10	1	1	1	2	2	3	1	3	2	2	3	2	2							2	1.8	1.5	0.67
1	29	08.28.2007 8:08 PM	Garmon	Chesapeake Bay Retriever	8	1	7	1	1	2	2	2	3	1	3	2	2	3	2	2							1	2	1.75	2
1	31	08.28.2007 8:11 PM	Janosch	Chesapeake Bay Retriever	8	1	1.3	1	1	3	2	2	3	1	3	2	2	3	2	2							0.8	2	1.25	2
2	70993	10.01.2008 9:53 PM	Madoxx	Chesapeake Bay Retriever	8	1	0.4	1	0	1	2	1	2	2	3	0	1	1			1	1	2	2	1	0					0.58
1	2258	09.21.2007 12:04 PM	pippa	Chesapeake Bay Retriever	8	1	3.5	2	1	0	3	2	2	3	1	0	1	0	2	1							1.2	2	2	2
1	12251	12.18.2007 7:10 PM	aaron	Chihuahua	9	1	3	1	0	0	2	2	1	2	2	0	2	0	2	2							1.4	1.8	1	2
1	10410	12.03.2007 12:24 AM	Alana	Chihuahua	9	1	0.5	2	0	0	2	2	2	2	2	1	2	2	2	2							1.4	1.8	2	1.33
1	13159	12.30.2007 11:54 PM	Amigo	Chihuahua	9	1	1	1	0	1	2	2	3	2	2	1	1	0	2	2							0.2	1.2	0.25	1.33
2	78217	11.02.2008 9:46 PM	Anita Gütschhofer	Chihuahua	9	1	0.25	2	0	1	2	2	3	1	3	0	1	1			1	1	2	2	1	1					0.42
2	57033	07.23.2008 8:42 PM	anton	Chihuahua	9	1	0.6	1	0	1	3	2	2	1	1	0	2	0			0	1	1	1	0	1					1
1	5456	10.22.2007 8:13 PM	Armani	Chihuahua	9	1	0.5	1	0	0	2	2	2	2	2	0	1	0	2	2							1	1.8	1	1.33
2	55523	07.17.2008 1:04 PM	Balou	Chihuahua	9	1	5	1	1	3	1	2	3	3	2	2	2	1			0	2	1	1	1	1					0.75
1	9918	11.29.2007 2:32 PM	Balu	Chihuahua	9	1	0.6	1	0	0	2	2	2	2	2	0	2	3	2	2							1.2	2	1.5	1
1	11359	12.09.2007 8:14 PM	benny	Chihuahua	9	1	1.5	1	1	1	3	2	3	1	2	2	1	0	2	1							1	1.8	0.25	2
1	477	09.03.2007 2:50 PM	Bibi	Chihuahua	9	1	0.8	2	0	3	3	2	3	1	3	1	1	0	2	1							0.6	1.8	1	1.67
2	91937	01.03.2009 9:27 PM	Billy	Chihuahua	9	1	10	1	1	2	2	2	3	3	2	2	2	2			0	2	1	1	0	0					0.83
1	5070	10.19.2007 11:57 AM	busco	Chihuahua	9	1	2	1	0	0	2	2	2	2	3	0	1	1	2	1							0.4	1	1	1.67
1	9693	11.27.2007 11:49 PM	Capo	Chihuahua	9	1	1	1	0	0	3	2	2	3	3	0	3	0	2	2							0	1.8	1.75	2
2	75273	10.19.2008 1:34 PM	Caramba	Chihuahua	9	1	5	2	0	3	3	2	3	1	2	2	2	0			0	1	2	1	0	1					0.5
2	69687	09.25.2008 4:01 PM	Casy	Chihuahua	9	1	0.4	2	0	1	2	2	2	3	2	0	1	0			0	1	1	1	1	1					1.08
1	9146	11.23.2007 11:34 PM	chanel	Chihuahua	9	1	0.5	2	0	2	2	2	2	2	3	0	2	0	2	2							0.8	1.2	0.5	0.33
1	3423	10.03.2007 7:57 PM	charlie	Chihuahua	9	1	3	1	0	0	2	1	3	2	2	0	1	1	2	2							0	1.6	1	0.67
1	4113	10.10.2007 3:37 PM	chico	Chihuahua	9	1	0.7	1	0	0	3	2	1	2	3	0	1	0	2	2							1.4	1.8	1.5	1.67
2	71435	10.03.2008 4:22 PM	Chico	Chihuahua	9	1	3	1	0	0	2	2	2	1	3	2	3	0			1	1	1	1	0	1					1.17
1	4209	10.11.2007 5:22 PM	Chipsy	Chihuahua	9	1	2.5	1	0	1	3	1	3	4	2	1	1	0	2	2							1.4	1.2	0.75	2
2	53693	07.08.2008 8:11 PM	Cookie	Chihuahua	9	1	3	1	1	0	2	2	2	2	2	1	1	1			0	1	1	2	1	1					1
1	6916	11.03.2007 1:43 PM	Daisy	Chihuahua	9	1	6	2	0	0	2	2	1	3	2	2	2	3	2	1							1.4	1.8	1	1
1	4578	10.15.2007 1:13 PM	danny	Chihuahua	9	1	7	1	1	1	2	2	1	3	3	0	1	0	1	2							1.2	0.6	1.25	1.67
1	4061	10.09.2007 11:56 PM	dj	Chihuahua	9	1	2.5	1	0	1	2	2	2	3	2	1	1	0	2	2							1.2	1	1.5	2
2	75274	10.19.2008 1:44 PM	Dolores	Chihuahua	9	1	3	2	0	3	3	2	3	1	2	2	2	0			0	1	2	1	0	1					0.42
1	7843	11.12.2007 12:46 AM	eddi	Chihuahua	9	1	0.9	1	0	1	3	1	2	2	3	1	1	0	1	1							0	1	1	0.33
2	66863	09.11.2008 12:15 AM	Eevee	Chihuahua	9	1	8	2	1	2	3	2	3	1	1	1	1	0			0	1	1	1	0	1					0.75
2	56868	07.23.2008 12:53 PM	elvis	Chihuahua	9	1	2	1	0	0	2	2	2	3	3	0	1	0			0	1	1	1	1	1					1.17
1	11784	12.12.2007 10:41 PM	emilio	Chihuahua	9	1	4	1	1	2	4	2	2	2	3	2	2	3	2	2							0.4	1.8	0.5	1.33
2	78784	11.05.2008 9:31 PM	Fussel	Chihuahua	9	1	1	1	1	1	3	2	3	3	2	0	2	1			0	1	2	2	1	1					1
1	3193	10.01.2007 7:33 PM	Gerry	Chihuahua	9	1	0.9	1	0	0	2	2	2	2	2	0	1	1	2	2							0.8	1.6	1.5	2
1	6686	11.01.2007 11:44 AM	Gina	Chihuahua	9	1	13	2	0	0	3	2	3	2	2	2	1	0	2	2							1.8	1	1.25	0.33
1	1760	09.18.2007 6:39 PM	Gucci	Chihuahua	9	1	0.4	1	0	0	2	2	2	1	2	1	1	0	2	2							0.8	1.6	0	2
2	91554	01.01.2009 4:53 PM	Hannes	Chihuahua	9	1	4	1	0	2	2	2	3	1	2	2	2	1			0	1	2	1	1	1					1
2	66983	09.11.2008 2:23 PM	Henriette	Chihuahua	9	1	1	2	0	3	2	2	3	1	2	2	1	1			0	1	2	1	1	1					1.08
2	71904	10.06.2008 9:50 PM	Indi	Chihuahua	9	1	0.4	1	0	0	3	2	3	3	3	0	1	0			0	1	1	2	1	1					0.75
1	1585	09.17.2007 1:11 PM	Ivy	Chihuahua	9	1	1	2	0	0	2	2	2	4	2	1	1	0	2	2							2	2	1.75	2
1	2721	09.26.2007 3:51 PM	Jita	Chihuahua	9	1	2	2	0	0	2	2	1	1	3	2	1	3	2	2							1.6	1.8	1.5	1.33
2	69444	09.24.2008 11:50 AM	Joschi	Chihuahua	9	1	4	1	0	1	2	1	2	2	2	1	1	0			0	1	3	2	0	1					0.58
2	75383	10.20.2008 4:05 AM	Joschi	Chihuahua	9	1	4	1	1	0	3	1	2	2	2	2	1	0			0	2	1	1	1	1					1.58
1	2510	09.24.2007 3:20 PM	joyce	Chihuahua	9	1	0.9	2	0	0	2	2	3	3	3	2	1	2	2	2							1.6	1.4	1.75	1.67
1	12551	12.23.2007 1:42 AM	Kimberly	Chihuahua	9	1	0.9	2	0	0	3	2	2	1	2	1	1	0	2	2							0.2	1	0.75	0.67
2	83948	11.26.2008 9:40 PM	KIRA	Chihuahua	9	1	4	2	1	0	4	2	3	3	3	0	1	0			1	1	2	2	1	1					0.58
1	4542	10.14.2007 10:54 PM	kitty	Chihuahua	9	1	7	2	0	1	1	2	2	1	2	1	2	0	2	2							0.4	0.8	0.75	0.67
1	10721	12.04.2007 9:34 PM	Ladera	Chihuahua	9	1	7	2	0	0	2	2	3	1	1	0	1	0	2	2							1.2	1.8	1	2
1	4310	10.12.2007 6:50 PM	lampert	Chihuahua	9	1	4	2	0	3	4	2	3	1	2	0	1	0	2	2							0.8	1	0.5	0.33
2	91547	01.01.2009 2:52 PM	Lila	Chihuahua	9	1	0.5	2	0	0	2	2	1	1	3	0	1	0			0	2	1	2	1	1					0.92
1	5458	10.22.2007 8:28 PM	lilly	Chihuahua	9	1	0.3	2	0	0	2	2	2	2	3	1	1	1	2	2							1.8	1.6	1.5	2
2	60304	08.09.2008 1:34 PM	Lilly	Chihuahua	9	1	4	2	0	1	3	2	2	3	2	0	1	1			0	1	2	1	1	1					1.25
1	5417	10.22.2007 3:13 PM	Linus	Chihuahua	9	1	0.5	1	0	0	2	2	2	2	2	0	1	2	2	2							1.8	1.8	1.5	1.67
2	75424	10.20.2008 8:53 AM	Linus	Chihuahua	9	1	4	1	0	0	2	2	3	2	1	1	1	0			0	1	2	1	1	1					1
2	92905	01.08.2009 9:06 PM	lola	Chihuahua	9	1	0.5	2	0	0	3	2	2	2	1	0	1	0			0	1	1	1	1	1					1.08
1	6084	10.27.2007 1:27 PM	Loui	Chihuahua	9	1	0.8	1	0	0	2	2	2	4	2	0	1	0	2	2							0.6	2	1.5	0.67
1	7740	11.11.2007 3:23 AM	Lucky	Chihuahua	9	1	0.5	1	0	0	3	2	2	2	2	0	2	0	2	2							0	0.4	1.5	0
1	7008	11.03.2007 9:39 PM	Maja	Chihuahua	9	1	0.9	2	0	1	3	2	2	1	3	1	2	0	2	2							0.4	1	0.75	0
1	10138	12.01.2007 10:42 AM	maja	Chihuahua	9	1	1.5	2	0	1	3	2	1	1	3	2	2	0	2	2							0	1	0.5	1.67
2	75319	10.19.2008 7:04 PM	Marlon	Chihuahua	9	1	2	1	1	1	2	2	2	3	2	0	2	3			0	1	2	1	1	1					0.5
1	10327	12.02.2007 2:48 PM	Massimo	Chihuahua	9	1	0.7	1	0	0	3	2	3	4	1	0	1	1	2	2							1.2	1.8	1.75	2
1	12544	12.22.2007 8:42 PM	melinda	Chihuahua	9	1	2	2	1	0	2	2	1	1	3	0	1	0	2	2							2	1.6	1.5	1.67
1	11452	12.10.2007 2:11 PM	Merlin	Chihuahua	9	1	2.5	1	1	0	2	2	2	3	1	0	1	2	1	2							0	2	1.25	1.67
2	72332	10.08.2008 11:19 AM	merlin	Chihuahua	9	1	0.5	1	0	2	2	2	3	2	2	1	1	0			0	1	1	2	1	1					1.17
2	63783	08.26.2008 12:59 PM	Merlin	Chihuahua	9	1	5	1	0	0	4	1	2	4	2	0	2	0			0	1	2	1	0	0					1.5
2	58075	07.29.2008 10:15 PM	Miriam Potthoff	Chihuahua	9	1	5	1	1	0	3	2	2	3	2	2	1	0			0	2	2	1	1	1					0.83
1	7506	11.08.2007 3:03 PM	missi	Chihuahua	9	1	4	2	0		2	2	1	2	3	0	2	2	2	2							1	2	1.5	1.67
2	57584	07.26.2008 12:00 PM	Mogli	Chihuahua	9	1	1	1	0	3	2	2	1	2	3	2	3	0			0	1	3	2	1	1					1
1	4287	10.12.2007 2:20 PM	Nellie	Chihuahua	9	1	14	2	1	3	3	2	4	3	1	1	1	0	2	2							2	1.4	1.75	1.67
1	11819	12.13.2007 12:41 PM	panji	Chihuahua	9	1	0.3	2	0	0	2	2	2	3	2	0	1	0	2	2							1.2	1.6	1.5	2
1	1511	09.16.2007 6:06 PM	Pauline	Chihuahua	9	1	7	2	0	1	3	2	3	3	2	1	1	0	2	2							0.6	0.8	0	0.67
1	1292	09.14.2007 3:11 PM	peanut	Chihuahua	9	1	2	1	0	0	2	2	3	1	3	0	2	0	2	2							1.2	2	1	1.33
2	52985	07.05.2008 12:18 PM	Peanut	Chihuahua	9	1	0.5	2	0	1	2	2	2	2	3	0	1	0			0	2	3	1	1	0					0.75
2	74263	10.15.2008 4:46 PM	pia	Chihuahua	9	1	7	2	0	1	1	2	3	1	3	2	3	0			0	1	3	2	1	1					1.08
2	79684	11.10.2008 5:20 PM	Rasputin	Chihuahua	9	1	2	1	0	2	2	2	3	2	1	0	1	1			0	2	2	1	1	1					0.58
1	979	09.11.2007 7:08 PM	Rhani	Chihuahua	9	1	1	1	0	1	3	2	1	4	3	0	2	0	2	1							0.4	1.4	1	2
1	1703	09.18.2007 11:55 AM	riehl	Chihuahua	9	1	2	1	0	0	2	2	3	2	3	0	1	0	1	1							1.6	1.6	1.75	2
2	75277	10.19.2008 2:53 PM	Rio	Chihuahua	9	1	2.5	1	1	3	2	2	2	2	3	2	2	0			1	1	2	1	1	1					0.75
1	10052	11.30.2007 2:48 PM	Sammy	Chihuahua	9	1	2	1	0	0	2	2	3	2	3	0	1	0	1	2							0	1.8	0.5	2
1	3087	09.30.2007 6:03 PM	Sammy	Chihuahua	9	1	3	1	1	0	2	2	3	2	3	0	1	2	1	2							0.8	1.6	1	1.33
2	54996	07.15.2008 5:56 PM	Sammy	Chihuahua	9	1	2	1	1	0	2	2	1	2	3	0	2	0			0	1	1	1	1	1					0.92
1	4600	10.15.2007 3:26 PM	santana	Chihuahua	9	1	2	2	0	1	4	2	2	2	3	1	2	0	2	2							0	0.6	0.5	0.67
1	7905	11.12.2007 4:13 PM	Shila	Chihuahua	9	1	0.3	2	0	1	2	2	2	3	2	0	1	0	2	2							0.6	1.4	0.75	1
2	65011	09.01.2008 5:02 PM	Shiva	Chihuahua	9	1	1	2	0	0	2	2	2	1	2	0	2	0			0	1	1	1	1	1					0.42
1	11768	12.12.2007 9:06 PM	snoopy	Chihuahua	9	1	0.3	1	0	1	2	2	3	1	3	0	1	0	2	2							1	2	1.75	2
1	4141	10.10.2007 7:56 PM	Snoopy	Chihuahua	9	1	0.4	1	0	1	2	2	2	3	3	0	3	0	2	2							1	1.4	1.75	1
1	8938	11.22.2007 9:47 AM	Spikey	Chihuahua	9	1	0.8	1	0	1	2	2	3	1	3	1	1	0	2	1							1.2	0.8	1.25	1
2	74306	10.15.2008 9:27 PM	Stella	Chihuahua	9	1	1	2	0	0	3	2	3	4	3	0	1	0			1	1	2	2	0	1					0.42
2	68691	09.19.2008 11:41 PM	Stitch	Chihuahua	9	1	1.7	1	0	1	2	2	2	1	2	0	1	0			0	1	2	2	1	1					0.75
1	1643	09.17.2007 8:39 PM	sunka	Chihuahua	9	1	1	1	0	2	2	1	3	1	2	1	1	0	1	2							1.2	2	1.25	1.33
2	67626	09.15.2008 12:49 PM	Sunny	Chihuahua	9	1	4	2	0	2	4	2	1	3	3	1	1	2			1	1	2	1	1	1					0.42
1	7425	11.07.2007 4:17 PM	taxi	Chihuahua	9	1	0.6	2	0	1	2	2	3	2	2	1	1	0	2	2							1.4	1.8	1.5	2
1	5953	10.26.2007 11:55 AM	Taylor	Chihuahua	9	1	0.3	1	0	0	3	1	1	3	2	0	2	0	2	2							1.8	1	1.75	2
1	10408	12.02.2007 11:27 PM	tess	Chihuahua	9	1	0.4	2	0	0	3	2	3	1	3	0	1	0	2	2							1.2	1.8	0	2
1	8722	11.20.2007 1:59 PM	thommy	Chihuahua	9	1	6	1	0	2	3	2	3	3	2	0	1	0	2	2							1.2	1.6	1.75	1
2	78398	11.04.2008 12:39 PM	Timmy	Chihuahua	9	1	1	1	0	0	2	2	2	1	2	0	2	0			0	1	2	2	1	0					1.25
1	11756	12.12.2007 8:12 PM	Tinkabell	Chihuahua	9	1	2	2	0	0	2	2	1	1	3	0	1	1	2	2							1.2	2	0.75	1
1	6942	11.03.2007 3:37 PM	Tysen	Chihuahua	9	1	2	1	0	1	2	1	2	2	1	0	2	0	2	2							1.6	1	1.5	2
1	2491	09.24.2007 11:46 AM	Winslow	Chihuahua	9	1	1.3	1	0	0	2	2	2	2	2	0	1	0	2	2							0.4	1.8	1.75	1
1	12987	12.29.2007 4:29 PM	Zoe	Chihuahua	9	1	0.7	2	0	1	3	2	3	2	2	0	1	0	2	2							0.4	1.4	1.25	1.33
2	54486	07.12.2008 9:58 AM	Asher	Chinese Crested Dog	9	1	2	1	0	1	2	2	3	2	2	1	2	1			0	1	2	1	0	1					0.92
1	5581	10.23.2007 8:02 PM	Chico	Chinese Crested Dog	9	1	9	1	0	0	4	2	2	2	3	0	2	0	1	2							0.4	1.2	1.75	1
1	1109	09.12.2007 5:26 PM	Emmy	Chinese Crested Dog	9	1	0.4	2	0	0	2	2	3	2	3	0	1	1	2	2							0.6	1.6	1.5	1.67
2	67665	09.15.2008 3:16 PM	Kafka	Chinese Crested Dog	9	1	2.5	1	0	1	2	2	3	2	2	1	2	2			0	1	2	1	0	1					0.75
1	7335	11.06.2007 7:00 PM	Monty	Chinese Crested Dog	9	1	1.4	1	0	0	2	2	3	1	2	0	1	2	1	2							0.8	1.2	1.75	2
1	3856	10.08.2007 10:13 AM	Pixel	Chinese Crested Dog	9	1	1.5	1	0	1	3	2	3	1	2	1	1	0	1	1							1.4	1	1.75	1
[truncated: 13,392 more rows]

## Sheet: labels
Survey		1: S1; 2: S2; 3: both
ID		ID of the dog
Date		date of the completition
Dog name		dog name
Breed		breed
FCI group		1: Sheepdogs and Cattledogs (except Swiss Cattledogs); 2: Pinscher and Schnauzer - Molossoid and Swiss Mountain and Cattledogs; 3: Terriers; 4: Dachshunds; 5: Spitz and primitive types; 6: Scent hounds and related breeds; 7: Pointing Dogs; 8: Retrievers - Flushing Dogs - Water Dogs; 9: Companion and Toy Dogs; 10: Sighthounds; - : not recognised
Mix_purebred		0: mixed-breed; 1: purebred
Age		in years
Sex		1: male; 2: female
Neutering		0: not; 1: neutered
Nprevious_dogs4gr		0: no previous dog; 1: 1; 2: 2; 3: 3 or more previous dogs
Age_acquisition		1: bred by owner; 2: 2-12 weeks; 3: 3-12 months; 4: > 1 year
Owner_gender		1: man; 2: woman
Owner_age		1: ≤ 18 years; 2: 19-30 years; 3: 31-60 years; 4: > 60 years
Education		1: primary school; 2: secondary school; 3: college; 4: university
Npeople3gr		1: only 1 person; 2: 2 people; 3: 3 or more people
Nother_dogs3gr		0: no other dog; 1: 1; 2: 2 or more other dogs
Purpose_keeping3gr		1: family member only; 2: family member + other; 3: not family member
Training4gr		0: no training; 1: 1 type; 2: 2 types; 3: 3 or more types
Time_together2gr_S1		1: ≤ 3 hours; 2: > 3 hours
Play_week2gr_S1		1: 1-5 days; 2: 6-7 days
Child2gr_S2		0: no child; 1: 1 or more
Where_keep3gr_S2		1: only indoors; 2: in- and outdoors; 3: only outdoors
Walk3gr_S2		1: < 1 hour; 2: 1-3 hours; 3: > 3 hours
Play_day2gr_S2		1: ≤ 1 hour; 2: > 1 hour
Gift_S2		0: no; 1: yes
Allow_bed_S2		0: no; 1: yes
S1_Calmness		trait score of Calmness
S1_Trainability		trait score of Trainability
S1_DogSociability		trait score of Dog Sociability
S1_Boldness		trait score of Boldness
S2_ProblematicBehaviour		trait score of Problematic behaviour
